# Supplementary material
Source: publisher figshare collection journal article supplement (https://gsapubs.figshare.com/ndownloader/files/30871570)
Supplement: Supplementary file 1 [file 30871570]

## Sheet: 1A Nanling Sn-W region
Table S1A Geochemical data of the Late Jurassic Sn(-W)- and Late Triassic W-related granite in the Nanling region, South China
Deposit	Sample Number	Rock type	SiO2	TiO2	Al2O3	Fe2O3T	FeO	Fe2O3	MnO	MgO	CaO	Na2O	K2O	P2O5	Rb	Sr	Zr	Nb	Hf	Ta	W	Sn	K/Rb	Rb/Sr	Nb/Ta	Zr/Hf	Fe2O3/FeO	TZr(°C)	References
Jurassic Sn(-W) deposit
Hehuaping Sn deposit	ZK16003-03	Biotite granite	75.94	0.12	12.35	1.59	0.99	0.5	0.02	0.1	0.83	2.57	4.73	0.03	323	49.6	127	22.3	5.31	3.21	3.9	5.8	121.514	6.5121	6.94704	23.9171	0.505051	780	Zhang et al., 2016
	ZK16003-04		74.91	0.12	13.11	1.54	1	0.44	0.02	0.1	0.91	2.7	5.01	0.03	346	42.4	141	22	5.47	3.16	1.7	3.4	120.151	8.16038	6.96203	25.777	0.44	788
	ZK12802-04		73.19	0.1	14.3	1.2	0.77	0.35	0.02	0.15	0.99	2.95	5.28	0.02	342	69.3	130	15.4	5.01	2.42	2.2	18	128.108	4.93506	6.36364	25.9481	0.454545	780
	ZK12802-08		73.28	0.28	12.94	2.49	1.68	0.62	0.03	0.24	1.69	2.78	4.22	0.09	272	83.4	211	28.3	7.47	3.69	1.7	13.4	128.739	3.26139	7.66938	28.2463	0.369048	816
	ZK14401-04		73	0.18	13.65	2.02	1.04	0.86	0.03	0.21	1.07	2.44	5.37	0.01	275	88.6	199	18.1	6.99	2.41	1.2	6.3	162.035	3.10384	7.51037	28.4692	0.826923	819
	ZK11202-27		73.57	0.22	13.31	2.04	1.43	0.46	0.03	0.16	1.47	3	4.63	0.06	293	66.7	184	24	6.5	3.25	4.6	9.4	131.123	4.3928	7.38462	28.3077	0.321678	802
	ZK11202-28		74.41	0.21	13.03	1.95	1.39	0.4	0.03	0.16	1.22	2.79	5.09	0.06	317	68.2	176	23.2	6.15	3.18	4.1	9.9	133.237	4.64809	7.2956	28.6179	0.28777	800
	ZK0004-6		76.34	0.06	12.39	1.17	0.65	0.45	0.03	0.05	0.78	3.18	4.57	0.04	412	16.6	102	32	5.29	5.59	7.8	13.9	92.0419	24.8193	5.72451	19.2817	0.692308	756
	HHPD-42		75.87	0.09	12.66	1.52	1.03	0.38	0.04	0.08	0.83	3.2	4.86	0.05	684.3	31.6	157.2	35.8	9.59	6.52	12.8	25.3	58.9327	21.6551	5.4908	16.3921	0.368932	790
	HHPD-45		74.81	0.09	13.23	1.5	1.17	0.2	0.05	0.08	1.49	3.67	3.59	0.05	586.4	35.3	198.5	34.6	10.7	10.68	14.8	32.1	50.8004	16.6119	3.2397	18.5514	0.17094	810
	47P-19	Granite porphyry	77.19	0.09	11.77	1.38	0.65	0.66	0.04	0.28	0.67	1.54	5.07	0.05	556.4	10	154	27.4	7.62	4.97	11.4	18.4	75.6115	55.64	5.51308	20.21	1.01538	809
	HHPP-45		75.2	0.24	11.98	2.18	1.43	0.59	0.05	0.34	1.17	2.25	4.74	0.09	400.5	47.6	202.3	19.3	7.51	3.09	3.9	13	98.207	8.41387	6.24595	26.9374	0.412587	818
	09HHP03		75.86	0.09	12.5	1.37	1.23	0	0.03	0.13	0.63	3.29	5.15	0.03	565.3	16.6	148.1	36.2	6.67	6.41	20.6	13.7	75.5953	34.0542	5.64743	22.2039	0	783
	6503-4		75.62	0.12	12.03	1.45	1.24	0.07	0.04	0.23	1	2.19	5.75	0.04	629.7	20.5	161.3	30.1	6.22	4.94	8.1	18.8	75.7706	30.7171	6.09312	25.9325	0.0564516	792
	ZK11202-1		69.69	0.31	12.86	2.38	1.67	0.53	0.05	1.18	3.01	0	5.66	0.09	470.5	30.1	190.4	23.9	6.02	3.19	8.1	9.8	99.8214	15.6312	7.49216	31.6279	0.317365	810
	DGL-10-6		75.21	0.12	12.28	1.62	1.07	0.43	0.03	0.39	0.87	1.02	6.83	0.04	676.8	53.8	185.6	46.9	7.31	7.44	7.4	44.9	83.7389	12.5799	6.30376	25.3899	0.401869	815
	HH12-8	Granite porphyry	75	0.14	11.43	2.59333	2.28	0.06	0.04	0.33	0.92	2.73	5.45	0.06	320	17.4	173	31.5	7.5	4.36	21.5	22.9	141.323	18.3908	7.22477	23.0667	0.0263158	787.826	Wang et al., 2013
	HH13-3		76.36	0.08	11.07	2.14778	1.78	0.17	0.04	0.16	0.79	3.28	4.68	0.02	349	10.3	123	32.1	6.96	5.79	6.54	20.8	111.272	33.8835	5.54404	17.6724	0.0955056	758.636
	HH14-4		76.28	0.2	11.06	2.71333	2.19	0.28	0.26	1.02	0.11	0.07	5.34	0.04	274	10.8	147	19.8	6.29	3.04	9.37	12.8	161.718	25.3704	6.51316	23.3704	0.127854	830.47
	HH18-9		80.78	0.11	11.44	2.44	1.53	0.74	0.02	0.16	0.09	0.05	3.48	0.03	313	4.73	144	31.6	7.05	4.92	13.4	22.1	92.2575	66.1734	6.42276	20.4255	0.48366	851.759
	Hh0404		75.05	0.22	12.44	4.01889	1.43	2.43	0.05	0.37	0.79	2.54	5.12	0.03	364.5	42.42	190.4	22.96	7.46	4.14			116.557	8.59264	5.54589	25.5228		811.823
	WXL-15	Biotite monzogranite	75.95	0.04	12.73	1.46	1.07	0.271111	0.06	0.05	0.63	3.29	4.75	0.01	995	4.34	97.2	36.4	5.97	10.8			39.613	229.263	3.37037	16.2814	0.253375	753.241	Zheng and Guo, 2012
	WXL-16		77.24	0.04	12.26	1.03	7.18		0.02	0.11	0.72	3.24	4.5	0.01	675	10.6	85	34.5	5.98	8.79			55.3191	63.6792	3.92491	14.214	0	737.402
	WXL-17		76.09	0.03	12.82	1.16	0.81	0.26	0.04	0.04	0.61	3.57	4.6	0.02	916	5.99	98.2	43.9	6.84	12.5			41.6705	152.922	3.512	14.3567	0.320988	752.606
	WXL-18		77.98	0.03	11.76	0.97	0.49	0.425556	0.04	0.08	0.47	3.07	4.64	0.01	632	7.25	86.4	33.6	5.7	8.93			60.9211	87.1724	3.7626	15.1579	0.868481	745.279
Xitian Sn deposit	HGY-4	Phophyritic biotite monzonite	70.7	0.34	14.5	2.45	1.43	1.13	0.09	0.61	1.57	3.02	5.16	0.15	656	175	227	18.8	7.55	2.64			65.2698	3.74857	7.12121	30.0662	0.79021	819.195	Chen D et al., 2013, 2014
	HGY-7		72.7	0.32	13.4	2.88	2.12	0.84	0.06	0.4	1.13	3.08	4.86	0.15	400	71	160	24.6	5.35	4.82			100.819	5.6338	5.10373	29.9065	0.396226	790.663
	HGY-9		75.3	0.03	13.2	1.28	0.92	0.4	0.04	0.01	0.46	4.5	4.28	0.01	770	8	75.6	26.2	2.52	12.1			46.1232	96.25	2.16529	30	0.434783	725.853
	D0017		71.7	0.3	15.2	2.23	1.18	1.17	0.09	0.54	0.54	3.79	4.03	0.12	470	129	127	19.2	4.23	4.28			71.1498	3.64341	4.48598	30.0236	0.991525	786.439
	D0094		76.1	0.1	12.6	1.86	1.83	0.03	0.05	0.17	0.37	3.25	4.55	0.04	471	35.8	71.8	17.2	2.39	3.39			80.1599	13.1564	5.07375	30.0418	0.0163934	733.663
	D5136		76.2	0.07	12.9	1.11	0.7	0.46	0.03	0.08	0.33	3.71	4.61	0.02	359	36.4	60.1	11.8	2	2.08			106.555	9.86264	5.67308	30.05	0.657143	716.14
	D0041		75.5	0.04	13.2	1.38	1	0.42	0.09	0.04	0.35	4.33	4.37	0.02	918	7.21	64.9	25.6	2.16	15.9			39.5008	127.323	1.61006	30.0463	0.42	717.047
	H13		73.58	0.2	13.36		1.75	0.78	0.04	0.16	0.95	2.87	5.63	0.05	444	48.6	173	15.5	5.77	2.02			105.219	9.1358	7.67327	29.9827	0.445714	796.855
	H4		70.67	0.34	14.46		1.43	1.13	0.09	0.61	1.57	3.02	5.16	0.15	656	175	226	18.8	7.55	2.64			65.2698	3.74857	7.12121	29.9338	0.79021	818.521
	H7		72.67	0.32	13.43		2.12	0.84	0.06	0.4	1.13	3.08	4.86	0.15	400	71	160	24.6	5.35	4.82			100.819	5.6338	5.10373	29.9065	0.396226	790.839
	XT-60	Medium- to fine-grained two-mica monzonite	74.64	0.12	12.72	1.41	1.17	0.11	0.05	0.34	1.33	1.92	4.28	0.03	664.19	32.34	132.21	28.16	5.1	6.2	23.87	45.03	53.471	20.5377	4.54194	25.9235	0.0940171	791.947	Yao et al., 2013
	Xt0416		73.07	0.26	13.44	2.5			0.08	0.31	0.87	3.29	4.79	0.13	518.9	43.51	141.1	26.15	4.64	6.82			76.5982	11.926	3.83431	30.4095		784.082
	Dahu		75.82	0.05	12.03	2.92	2.45	0.2	0.06	0.12	0.7	3.18	4.7	0.02	819.2	10	96	33.1	3.3	9.6	7.78	33.6	47.6074	81.92	3.44792	29.0909	0.0816327	747.588
	Shanyangkeng		75.52	0.07	12.06	3.07	2.28	0.54	0.08	0.2	0.62	3.23	4.45	0.01	803.7	10	96	38.9	3.7	14.3	43.21	49.7	45.9444	80.37	2.72028	25.9459	0.236842	750.393
	Bamuzhai		75.51	0.11	12.68	2.19	1.52	0.5	0.05	0.22	0.46	3.1	5.12	0.03	381.5	40	7	19.3	3.6	2.7	2.32	26	111.363	9.5375	7.14815	1.94444	0.328947	575.858
	Xt0413	Granite	73.92	0.03	15.28	1.19			0.04	0	0.4	3.97	4.67	0.01	76.3	1.95	88.77	27.58	1.12	17.69			507.878	39.1282	1.55907	79.2589		753.845
	X0406	Medium- to fine-grained porphyritic biotite monzonite	69.36	0.39	13.4			3.01	0.07	0.93	1.71	3.32	4.39	0.13	283.7	182.8	150.9	15.76	4.56	2.308			128.402	1.55197	6.82842	33.0921		775.32	Liu et al., 2008
	X0417		73.07	0.26	13.44			2.5	0.08	0.31	0.87	3.29	4.79	0.13	518.9	43.51	141.1	26.15	4.64	6.82			76.5982	11.926	3.83431	30.4095		782.367
	X01		71.9	0.325	13.7		2.23	0.62	0.071	0.635	1.82	3.08	5	0.134	375	49	127	20.8	5.1	1.9			110.638	7.65306	10.9474	24.902	0.278027	760.409
	X02		73.43	0.222	13.05		2.01	0.34	0.068	0.56	1.23	2.98	4.6	0.138	384.5	40	76	19.3	3.6	2.7			99.2723	9.6125	7.14815	21.1111	0.169154	729.928
	X03	Medium-grained biotite monzonite	74.8	0.12	12.97		1.12	0.2	0.047	0.235	0.68	3.21	5	0.049	803.7	10	96	38.9	3.7	14.3			51.6229	80.37	2.72028	25.9459	0.178571	750.88
	ZK10C02-01	Fine-grained granite	74.39	0.03	13.72			0.69	0.04	0.42	1.93	0.27	3.54	0.01	572	26.9	88.7	24.4	8.31	16.61			51.354	21.2639	1.46899	10.6739		782.502	Zhou et al., 2013
	ZK10C02-17		74.64	0.12	13.08			1.63	0.05	0.07	0.75	2.93	5.25	0.02	852	11.2	132	29.5	6.03	7.84			51.1313	76.0714	3.76276	21.8905		778.795
	ZK10C02-19	Porphyritic quartz granite	75.31	0.12	12.78			1.58	0.05	0.09	0.8	2.85	4.84	0.02	814	11.2	159	34.7	6.99	9.23			49.3387	72.6786	3.75948	22.7468		797.881
	ZK10C02-20		75.22	0.13	12.52			1.81	0.06	0.14	0.86	2.42	4.92	0.02	801	15.1	158	28.5	6.84	7.58			50.9682	53.0464	3.75989	23.0994		800.266
	ZK10C02-36	Medium- to fine-grained porphyritic granite	76.68	0.09	12.35			1.44	0.04	0.06	0.82	2.04	4.95	0.02	825	7	116	45.8	7.78	16.36			49.7872	117.857	2.79951	14.91		779.046
	ZK10C02-30		73.54	0.06	12.84			1.39	0.08	0.2	2.22	0.1	5.85	0.01	1119	20.7	132	38	7.93	12.64			43.3803	54.058	3.00633	16.6456		790.266
	ZK10C02-22		75.76	0.15	13.09			1.48	0.05	0.28	0.86	0.16	5.04	0.02	833	12	211	28.5	7.46	6.71			50.2056	69.4167	4.24739	28.2842		864.432
	ZK10C02-25		76.95	0.19	13.57			1.23	0.03	0.14	0.25	0.07	3.88	0.02	662	14.7	219	30.1	7.68	7.13			48.6341	45.034	4.2216	28.5156		893.013
	ZK10C02-12		74.9	0.13	12.7			1.87	0.08	0.13	0.81	2.34	5.12	0.02	904	14.6	136	28.4	5.98	8.12			46.9968	61.9178	3.49754	22.7425		787.996
	ZK10C02-03		74.27	0.1	12.81			2.07	0.1	0.11	1.45	0.14	5.87	0.02	1083	23.5	145	26.5	6.88	9.29			44.9755	46.0851	2.85253	21.0756		809.476
	ZK10C02-15		74.29	0.12	12.49			1.66	0.05	0.09	0.81	3.93	4.91	0.02	793	13	176	29	7.31	8.44			51.3777	61	3.43602	24.0766		786.69
	ZK10C02-27		74.54	0.06	13.48			1.57	0.05	0.18	0.91	0.15	5.07	0.02	1070	10.9	86.2	46.2	6.03	11.58			39.318	98.1651	3.98964	14.2952		781.572
	ZK10C02-07	Fine-grained porphyritic biotite granite	75.84	0.1	12.88			1.52	0.07	0.17	0.94	0.1	5.55	0.02	940	10.8	120	29.43	5.52	12.2			48.9928	87.037	2.4123	21.7391		804.719
	ZK10C02-33	Fine-grained porphyritic biotite monzonite	76.12	0.05	12.56			1.35	0.05	0.38	0.7	2.97	4.71	0.02	946	6.7	105	30.3	6.77	13.12			41.3139	141.194	2.30945	15.5096		761.997
Furong Sn deposit	FR-63	Granite (Furong phase)	67.36	0.74	14.34		3.23	1.49	0.08	0.78	2.68	3.39	5.07	0.23	264.08	204.207	298.744	31.5352	7.44823	2.99228	8.53916	10.1911	159.308	1.2932	10.5388	40.1094	0.4613	815.449	Zhao, et al., 2012
	FR-33		67.05	0.7	14.36		3.03	1.28	0.08	0.84	2.64	3.37	5.39	0.21	330.694	209.918	254.138	27.8306	5.94893	2.99638	5.97752	18.1231	135.248	1.57535	9.28808	42.7199	0.422442	798.667
	FR-12		67.32	0.74	14.41		2.87	1.29	0.06	1	2.43	3.12	5.44	0.21	366.26	236.756	269.702	26.9189	6.12419	3.16559	3.9907	60.7643	123.247	1.547	8.5036	44.0388	0.449477	811.417
	FR-19		70.28	0.28	13.77		2.04	0.88	0.09	0.46	1.8	3.36	6.21	0.09	517.14	117.863	85.9896	35.3027	3.18986	3.90035	6.98899	76.2441	99.6437	4.38765	9.05115	26.9572	0.431373	714.735
	GT-2-1		70.14	0.49	14.1		1.13	3.35	0.06	0.57	1.99	3.22	4.99	0.14	367.718	161.684	273.078	27.2778	6.30853	2.77183	13.0675	9.04464	112.604	2.27431	9.84109	43.2872		823.545
	FR-43		68.9	0.53	14.29		2.36	0.88	0.06	0.65	2.15	3.21	5.42	0.16	325.334	199.557	230.185	23.452	5.59591	3.00863	6.85393	12.8812	138.241	1.63028	7.79493	41.1345	0.372881	802.343
	GT-4-4		67.14	0.56	15.12		2.29	0.92	0.06	0.98	1.44	3.09	5.78	0.18	367.067	204.164	237.202	24.0455	5.40922	2.77016	11.4323	28.1327	130.662	1.79791	8.68017	43.8515	0.401747	818.512
	QTL-6	Granite (Cailing phase)	67.28	0.92	13.93		3.29	2.17	0.1	1.01	3.11	3.31	4.11	0.25	220.891	194.756	275.087	29.0383	9.02579	2.65116	3.0689	6.80027	154.394	1.13419	10.9531	30.4779	0.659574	807.725
	QTL-14		67.26	0.71	14.03		2.88	1.71	0.09	0.91	3.26	3.8	4.97	0.23	230.617	177.211	224.658	24.3962	7.64672	2.45083	3.47086	7.14804	178.826	1.30137	9.95423	29.3796	0.59375	772.356
	QT-27		67.64	0.86	12.6		4.32	1.8	0.15	1.1	2.5	2.92	4.46	0.3	427.2	91.76	462.7	50.85	9.561	6.699		15.64	86.6304	4.65562	7.59069	48.3945	0.416667	858.614
	QT-29		67.01	0.88	13.06		4.17	1.69	0.16	1.22	2.58	3.22	4.37	0.33	421	152.7	372.2	47.65	8.001	5.186		14.77	86.1323	2.75704	9.1882	46.5192	0.405276	835.208
	QT-30		66.5	0.72	14.01		3.41	1.45	0.11	1.1	2.2	3.07	4.94	0.3													0.42522
	QT-38		66.67	0.89	13.7		3.83	1.55	0.13	1.15	3.07	2.99	4.42	0.25	250.7	223.3	316.3	33	6.862	3.195		8.58	146.297	1.1227	10.3286	46.0944	0.4047	820.608
	2ksc-10a	Granite	67.03	0.58	14.27	4.73		0.06	0.72	1.85	3.14	5.35	0.19		422.22	223.28	233.49	22.95	7.59	2.64			3.73406	1.89099	8.69318	30.7628		807.896	Deng et al., 2005
	2ksc-10b		67.67	0.6	14.51	3.43		0.07	0.76	1.88	3	6.18	0.23		387.2	230.33	289.21	23.43	8.88	2.49			4.929	1.68107	9.40964	32.5687		818.216
	2ksc-10d		69.59	0.48	12.96	3.54		0.06	0.58	1.6	2.77	5.63	0.16		420.64	176.97	208.26	19.31	6.93	2.27			3.15628	2.3769	8.50661	30.0519		791.802
	2ksc-10e		67.97	0.78	14.19	5.12		0.08	0.9	2.84	3.3	4.28	0.26		293.34	176.4	307.07	30.56	10.03	3.42			7.35477	1.66293	8.93567	30.6152		845.496
	2ksc-12		66.48	0.72	14.33	4.95		0.07	0.85	2.5	3.42	4.77	0.24		433.42	183.29	237.69	26.94	7.7	3.3			4.59483	2.36467	8.16364	30.8688		812.422
	2ksc-13		64.84	1.12	13.36	7.08		0.11	1.34	3.15	3	4.48	0.36		328.54	168.84	311.32	45.22	10.06	4.55			9.09245	1.94587	9.93846	30.9463		838.77
	2ksc-14		74.57	0.24	12	2.06		0.03	0.25	1.31	2.84	5.37	0.09		322.82	111.83	85.17	12.13	2.91	2.13			2.31339	2.8867	5.69484	29.268		717.785
	2ksc-15		69.08	0.58	13.57	4.23		0.05	0.72	2.46	3.31	4.98	0.21		468.29	159.16	227.94	21.05	7.38	2.25			3.7211	2.94226	9.35556	30.8862		803.683
	2ksc-16		69.19	0.64	13.85	4.32		0.07	0.75	2.35	3.12	5.52	0.21		312.54	176.32	181.82	22.9	5.72	2.3			5.57546	1.77257	9.95652	31.7867		780.643
	2ksc-17		69.59	0.66	13.15	4.56		0.08	0.79	2.75	3.21	4.43	0.22		260.33	162.35	203.93	23.89	6.68	2.65			7.01238	1.60351	9.01509	30.5284		800.667
	2ksc-18		67.63	0.58	13.47	4.41		0.07	0.56	2.26	2.99	5.56	0.21		262.3	220.84	266.07	15.66	8.28	1.68			6.64336	1.18774	9.32143	32.1341		812.269
	2ksc-22a		70.55	0.45	13.88	3.39		0.05	0.52	2.02	3.15	5.08	0.12		383.87	144.6	173.15	21.01	5.78	2.7			2.59396	2.6547	7.78148	29.9567		785.151
	2ksc-23		75.32	0.1	12.5	1.55		0.02	0.05	0.67	3.17	5.74	0		654.46	21.96	166.76	27.71	7.79	5.25			0	29.8024	5.2781	21.4069		767.303
	2ksc-24		76.59	0.13	11.78	1.4		0.02	0.09	0.66	2.82	5.7	0.01		493.07	58.73	126.05	12.08	4.26	1.42			0.16829	8.39554	8.50704	29.5892		744.802
	2ksc-25		75.44	0.21	12.33	1.92		0.02	0.18	1.33	3.06	4.64	0.04		400.71	85.03	150.15	17.95	5.46	3.02			0.828317	4.71257	5.94371	27.5		774.226
	2ksc-26		72.41	0.15	13.36	3.39		0.05	0.43	1.83	3.22	4.99	0.11		399.96	11.46	164.43	25.34	5.48	2.8			2.28214	34.9005	9.05	30.0055		778.916
	2ksc-27a		66.14	0.29	14.81	4.39		0.07	0.86	2.34	3.21	5.83	0.21		274.77	227.55	215.48	23.13	6.57	2.34			6.34186	1.20751	9.88462	32.7976		794.55
	2ksc-27b		65.95	0.94	13.77	6.03		0.09	1.21	2.81	3.07	4.84	0.28		260.25	213.96	316.36	30.32	9.48	2.81			8.92759	1.21635	10.79	33.3713		838.364
	2ksc-27c		67.25	0.81	14.03	5.06		0.08	0.95	2.81	2.99	4.17	0.26		238.53	222.58	299.13	29.36	8.76	2.79			9.04476	1.07166	10.5233	34.1473		848.63
	D202_1	Granite	68.42	0.68	13.43	0.27	4.82	0	0.8	2	2.98	5.12	0.21		364.78	160.17	230.38	27.46	7.1	2.59			4.777	2.27746	10.6023	32.4479	0.0560166	802.464	Fu et al., 2006
	D202_2		65.84	0.88	14.36	0.32	5.14	0	1.29	2.57	3.46	4.22	0.25		354.19	151	242.63	25.01	6.99	2.84			5.85694	2.34563	8.80634	34.711	0.0622568	817.064
	D203_1		71.28	0.37	13.59	0.06	2.98	0	0.4	1.53	3.5	5	0.1		411.28	116.97	187.25	26.23	6.43	3.57			2.01757	3.51612	7.34734	29.1213	0.0201342	784.409
	D208_1		68.88	0.56	13.88	0.16	4.02	0	0.68	2.02	3.31	5.24	0.17		313.45	169.28	222.78	28.89	7.09	2.92			4.50036	1.85167	9.89384	31.4217	0.039801	796.992
	D208_2		73.84	0.19	12.54	0.05	2.41	0	0.19	1.01	3.12	5.46	0.05		408.08	111.2	159.47	15.84	6	2.03			1.0167	3.66978	7.80296	26.5783	0.0207469	764.872
	XN09-1		70.14	0.49	13.41	0.26	4.35	0	0.57	2	3.37	4.59	0.16		290.17	148.76	249.39	23.65	8.19	2.26			4.57545	1.95059	10.4646	30.4505	0.0597701	813.828
	D210-1		70.94	0.42	13.19	0.14	3.86	0	0.45	1.67	3.09	4.9	0.13		212.86	122.23	197.72	21.15	6.34	2.13			5.06776	1.74147	9.92958	31.1861	0.0362694	792.798
	D213-1		72.08	0.27	13.77	0.19	2.75	0	0.3	1.4	3.28	5.62	0.07		371.73	120.29	138.13	19.53	4.84	2.34			1.56256	3.09028	8.34615	28.5393	0.0690909	755.396
	D219-1		67.28	0.72	14.17	0.6	4.36	0	1.02	2.55	3.09	4.95	0.23		245.8	201.98	204.04	21.53	5.98	1.75			7.76449	1.21695	12.3029	34.1204	0.137615	796.522
	D220-1		67.64	0.86	12.6	1.8	4.32	0.15	1.1	2.5	2.92	4.46	0.3		427.2	91.76	462.7	50.85	9.56	6.7			5.82716	4.65562	7.58955	48.3996	0.416667	872.858
	QT-27		66.67	0.89	13.7	1.55	3.83	0.13	1.15	3.07	2.99	4.42	0.25		250.7	223.3	316.3	33	6.86	3.2			8.2747	1.1227	10.3125	46.1079	0.4047	843.041
	QT-38		68.56	0.51	14.23	0.51	3.94	0	0.62	1.83	3.34	5.13	0.22		278.7	112.89	148.55	22.49	4.65	3.2			6.55017	2.46877	7.02812	31.9462	0.129442	765.516
	D215-1		75.72	0.1	12.27	0.11	2.17	0	0.08	0.55	3.4	5.09	0.02		549.01	19.18	147.54	27.88	6.12	3.39			0.302285	28.6241	8.22419	24.1078	0.0506912	759.71
	D218-1		75.22	0.12	12.25	0	2.69	0	0.13	0.5	3.04	5.21	0.02		551.84	21.48	153.02	30.06	6.52	4.09			0.300735	25.6909	7.34963	23.4693	0	765.825
	D218-2		72.37	0.24	13.11	0.21	2.9	0.05	0.35	1.46	3.25	4.8	0.15		493.96	72.85	168.8	20.6	5.92	2.4			2.5198	6.78051	8.58333	28.5135	0.0724138	779.28
	XN04-1		72.71	0.19	13.14	0.35	2.61	0.05	0.29	1.51	2.55	5.18	0.17		427.49	57.79	179.81	23.28	7.68	3.44			3.29982	7.3973	6.76744	23.4128	0.1341	790.476
	C22	Granite (Furong phase)	75.63	0.24	11.78	0.46	2.1	0.04	0.34	0.89	2.72	4.98	0.06		416	61	151	23.7	6.6	2.7			1.19681	6.81967	8.77778	22.8788	0.219048	769.239	Bai et al., 2005
	C41		75.38	0.15	11.8	0.55	2.6	0.04	0.15	0.61	3.07	4.99	0.02		506.6	19	221	30.2	8.8	0.9			0.327591	26.6632	33.5556	25.1136	0.211538	796.611
	C40		75.68	0.16	11.99	0.32	2.47	0.05	0.18	0.76	3.06	4.59	0.03		504.8	33	155	30.2	5.7	6			0.493138	15.297	5.03333	27.193	0.129555	774.033
	C43		73.75	0.21	12.36	0.32	2.97	0.05	0.24	1.13	2.97	5.27	0.04		515.3	54	150	28.1	6.9	5.2			0.64412	9.54259	5.40385	21.7391	0.107744	762.96
	C55		71.13	0.41	13.26	0.73	3.27	0.06	0.49	2.21	3.34	4.1	0.11		383.1	113	194	28.4	7.8	4.6			2.38258	3.39027	6.17391	24.8718	0.223242	800.203
	C24		71.57	0.48	12.9	0.58	3.02	0.06	0.6	1.77	2.82	2.29	0.13		359.6	124	187	22.2	6.3	2.5			2.99979	2.9	8.88	29.6825	0.192053	832.738
	C42		72.17	0.3	13.21	0.88	2.75	0.05	0.36	1.3	3.12	5.11	0.07		424.4	96	172	24.7	6.5	3.2			1.36864	4.42083	7.71875	26.4615	0.32	779.972
	C21		67.89	0.61	13.74	1.49	3.65	0.08	0.66	2.45	3.14	5.09	0.21		273.9	200	262	28.7	9.8	3.5			6.36201	1.3695	8.2	26.7347	0.408219	814.296
	C23		69.49	0.59	13.03	0.82	4.08	0.07	0.86	2.31	2.93	4.8	0.18		307.6	161	216	24.9	7.1	2.3			4.85571	1.91056	10.8261	30.4225	0.20098	800.942
	C48-1		67.96	0.75	13.47	1.24	3.9	0.08	0.95	2.52	2.87	4.84	0.24		278.7	168	237	24.9	8.1	2.1			7.14564	1.65893	11.8571	29.2593	0.317949	811.138
	C60		70.49	0.47	13.61	0.59	2.97	0.05	0.59	2.19	3	4.68	0.14		317.1	145	180	23	7.1	2.8			3.66352	2.1869	8.21429	25.3521	0.198653	792.017
	C47		68.38	0.73	13.17	0.78	4.5	0.09	1.07	2.81	2.86	4.26	0.23		255.5	146	243	27.7	8.6	2.9			7.46971	1.75	9.55172	28.2558	0.173333	820.523
	C48-2		66.1	0.86	14.07	1.06	4.5	0.09	1.1	2.84	2.98	5.06	0.27		252	211	288	29.9	9.4	2.7			8.89058	1.19431	11.0741	30.6383	0.235556	825.198
	C54		65.92	0.82	14.32	1.23	3.98	0.09	1.08	3.01	3.02	4.97	0.25		239.6	232	228	24.1	8.3	1.7			8.65805	1.03276	14.1765	27.4699	0.309045	806.679
	FR-1	Granite	67.68	0.47	14.94			4.09	0.09	0.64	2.23	3.58	4.87	0.18	319.33	196.91	240.9	26.51	7.29	2.75	10.9	23.21	126.548	1.62171	9.64	33.0453		808.366	Li et al., 2010
	FR-10-1		57.35	0.61	18.25			4.698	0.15	0.71	2.77	7.5	0.99	0.28	130.1	273.46	265.03	24.49	7.73	2.37	5.18	283.21	63.1429	0.475755	10.3333	34.2859		799.497
	FR-10-4		65.2	0.6	13.63			4.68	0.12	0.86	2.88	3.15	4.36	0.21	283.99	225.82	269.52	25.93	7.95	2.58	5.4	28.32	127.394	1.25759	10.0504	33.9019		807.557
	FR-19-12		71.62	0.41	12.83			3.47	0.11	0.57	1.78	2.86	4.99	0.13	317.04	146.88	256.99	18.55	7.86	2.02	9.01	10.32	130.603	2.1585	9.18317	32.6959		819.669
	FR-19-13		68.62	0.44	13.35			3.71	0.1	0.73	1.73	2.77	5.37	0.15	372.26	159.59	294.11	21.19	8.25	2.29	21.75	11	119.7	2.3326	9.25328	35.6497		832.333
	FR-19-31		66.48	0.64	14.07			4.7	0.11	0.787	2.61	3.52	4.81	0.22	341.5	230.7	279.75	28.85	8.03	2.84	7.56	43.63	116.875	1.48028	10.1585	34.8381		808.966
	FR-19-34		71.16	0.45	13.04			3.77	0.08	0.72	1.76	3.27	4.54	0.15	405.64	144.45	199.53	23.96	6.95	3.32	4.22	185.49	92.8714	2.80817	7.21687	28.7094		796.035
	FR-19-41		65.17	0.83	14.47			5.33	0.13	1.12	3.05	3.26	4.85	0.3	318.73	271.01	265.41	34.85	7.21	3.02	7.91	60.24	126.266	1.17608	11.5397	36.8114		801.32
	FR-3		69.03	0.49	14.08			3.93	0.1	0.65	2.24	3.37	4.87	0.18	301.01	157.89	328.3	26.22	9.42	2.49	5.3	7.97	134.25	1.90645	10.5301	34.8514		835.061
	FR-32-1		68.5	0.52	13.76			4.32	0.12	0.7	2.3	3.26	4.91	0.19	279.41	181.2	284.61	24.03	8.09	2.34	6.62	37.84	145.816	1.542	10.2692	35.1805		818.676
	FR-43-4		70.23	0.52	13.5			4.16	0.1	0.72	2.14	3.17	4.83	0.18	340.63	165.81	216.41	22.79	6.29	2.49	9.14	20	117.661	2.05434	9.15261	34.4054		798.031
	GTL-55-1		75.1	0.13	12.53			2.12	0.11	0.23	0.93	3.5	4.62	0.03	461.12	42.35	126.6	24.91	5.69	4.24	21.03	14.31	83.1371	10.8883	5.875	22.2496		766.259
	GTL-3-2		71.04	0.13	11.45			3.49	0.13	0.72	1.09	1.45	4.58	0.03	478.19	51.79	117.52	23.8	5.42	4.22	19.04	20.1	79.4752	9.23325	5.63981	21.6827		779.532
	GTL-55-7		75.15	0.1	12.21			2.27	0.11	0.24	0.79	3.29	4.86	0.02	474.96	49.87	95.06	18.01	4.32	2.41	10.07	12.35	84.9075	9.52396	7.47303	22.0046		743.474
	SMK-54-1		72.13	0.26	13.19			2.82	0.1	0.46	1.25	2.92	5.41	0.08	470.01	103.44	125.21	27.94	4.4	3.46	17.58	15.62	95.5118	4.54379	8.07514	28.4568		763.538
	TXW-3-3		70.69	0.33	13.67			3.08	0.09	0.6	1.43	3.09	5.32	0.1	372.19	117.56	160.83	24.95	5.68	3.35	4.08	10.69	118.608	3.16596	7.44776	28.3151		782.374
	TXW-3-4		71.84	0.24	13.12			2.29	0.07	0.67	0.99	2.65	5.78	0.08	446.58	78.1	203.8	21.64	8.23	2.77	14.33	10.41	107.398	5.71805	7.81227	24.7631		809.978
	FR-32-3														1078.07	38.79	92.27	34.11	7.08	14.03	14.05	180.23	0	27.7925	2.43122	13.0325
Xianghualing Sn deposit	X-03-1	Biotite granite	73.83	0.01	14.52		0.27	0.02	0.04	0.06	0.76	3.99	5.44	0.01	1030	58	25.4	57.6	3.47	35.9			43.8257	17.7586	1.60446	7.31988	0.0740741	648.221	Lai, 2014
	X-03-2		71.57	0.01	15.01		0.27	0.03	0.04	0.06	1.44	3.72	6.71	0.01	1340	66.1	33.9	77.4	7.22	72.4			41.5513	20.2723	1.06906	4.69529	0.111111	655.26
	X-20-2		78.42	0.02	11.65		0.35	0.39	0.04	0.06	1.11	4.03	3.21	0.02	594	14.2	87.3	114	6.53	42.3			44.842	41.831	2.69504	13.3691	1.11429	735.448
	X-23-1		73.49	0.14	14.18		0.76	0.86	0.22	0.59	1.12	0.65	5.75	0.02	2530	14.6	48.8	74	6.02	29.3			18.8588	173.288	2.5256	8.10631	1.13158	722.607
	X-23-3		75.19	0.01	14.46		0.3	0.79	0.23	0.28	0.36	0.11	6.33	0.02	2285	8.13	87.1	84.8	9.32	42.9			22.9871	281.058	1.97669	9.34549		783.236
	X-23-7	Albite granite	75.21	0.01	14.41		0.79	0.28	0.3	0.18	0.2	0.17	6.19	0.01	2470	12.5	51.3	76.3	6.57	32.2			20.7951	197.6	2.36957	7.80822	0.35443	741.567
	X-23-8		74.54	0.01	14.66		0.6	0.28	0.26	0.32	0.22	0.19	6.46	0.01	2260	11.6	50.3	74.1	6.2	29.9			23.7187	194.828	2.47826	8.1129	0.466667	738.07
	X-26-1		76.19	0.05	12.82		0.56	0.75	0.05	0.08	0.65	3.22	5.42	0.02	1288	40.1	249	58.7	21.9	27.5			34.9181	32.1197	2.13455	11.3699	1.33929	830.397
	X-26-10		72.34	0.02	14.6		0.17	0.01	0.03	0.09	3.08	3.51	3.78	0.01	764	148	94.8	61.3	8.38	25.4			41.0549	5.16216	2.41339	11.3126	0.0588235	733.342
	X-26-2		69.13	0.02	14.62		0.1	0.04	0.01	0.08	4.34	3.4	5.84	0.02	1078	135	127	63.6	10	38.2			44.9532	7.98519	1.66492	12.7	0.4	721.113
	X-26-5	Granite porphyry	67.72	0.01	16.2		0.2	0.02	0.03	0.05	2.78	3.16	7.95	0.01	1590	133	95.4	38.2	8.27	18.7			41.4894	11.9549	2.04278	11.5357	0.1	714.603
	X-32		75.36	0.02	13.57		1.27	0.1	0.12	0.08	0.59	3.34	4.36	0.01	1190	15.6	57.6	56.4	5.28	21.8			30.4023	76.2821	2.58716	10.9091	0.0787402	719.256
	X-32-1		75.3	0.03	13.38		1.11	0.03	0.09	0.05	0.54	3.75	4.91	0.01	1190	13.9	68.7	57.3	5.21	17.3			34.2374	85.6115	3.31214	13.1862	0.027027	722.844
	X-33		75.34	0.03	13.48		0.94	1.12	0.08	0.12	0.6	3.67	4.2	0.01	1303	8.05	104	73.5	9	37.9			26.7468	161.863	1.93931	11.5556	1.19149	762.373
			74.18	0.07	13.53	0.3			0.02	0.01	1.48	3.63	4.82	0.02	973	61.6	118.7	54	8.2	28.2	5.1	5	41.1056	15.7955	0.522222	14.4756		757.052
			75.31	0.02	13.7	0.8			0.09	0.14	0.57	4.16	3.44	0.01	1166	10.7	73.6	74.6	7	28.9	105.3	16.7	24.4809	108.972	0.387399	10.5143		737.261
			74.46	0.01	14.14	1.38			0.02	0.06	0.5	5.71	3.68	0.01	1069	25.1	52.5	59.1	8.6	43.8	15.3	2.4	28.5652	42.5896	0.741117	6.10465		693.597
			70.36	0.03	15.66	1.41			0.1	0.06	0.5	5.83	4.86	0.04	1616	9.4	71.4	83.8	6.7	26.4	115.5	9.4	24.9552	171.915	0.315036	10.6567		711.808
			73.31	0.02	14.33	1.99			0.11	0.08	0.56	3.32	3.3	0	1924	7.4	68.5	67.4	5.4	30.3	166.8	24.3	14.2323	260	0.449555	12.6852		745.512
			74.57	0.01	13.97	0.83			0.08	0.14	0.2	3.69	5.68	0.04	1979	12.4	70.4	70.6	8.5	39	294.7	25.6	23.816	159.597	0.552408	8.28235		727.056
			73.66	0.04	13.39	1.98			0.09	0.15	1.2	2.97	4.3	0.02	1620	10.5	84.7	82	6.8	28	74.2	19.9	22.0252	154.286	0.341463	12.4559		745.961
			75.52	0.02	13.09	1.81			0.06	0.06	0.49	4.12	4.14	n.d.	1239	13.5	62.8	61.8	4.4	21.5	66.4	17.8	27.7265	91.7778	0.347896	14.2727
			73.32	0.04	13.81	1.35			0.11	0.08	0.56	4.78	4.78	0	1865	5.8	89.8	79.7	5.1	20.6	97.9	47.2	21.2675	321.552	0.258469	17.6078		733.556
			71.44	0.08	16.81	4.09			0.18	0.02	0.57	3.04	2.21	0.02	1902	4.3	99.9	59.1	6.4	7.7	171	39.5	9.64159	442.326	0.130288	15.6094		796.423
			73.42	0.09	13.65	1.5			0.09	0.09	1.34	3.05	4.49	0.02	1267	19	101.5	56.2	5.7	19.7	55.9	55.2	29.406	66.6842	0.350534	17.807		757.368
			74.93	0.08	13.34	1.41			0.1	0.02	0.61	3.49	4.31	0.02	1269	4.6	93	56.1	7.4	21.7	35.1	62.2	28.1827	275.87	0.386809	12.5676		754.983
	LZL-1	Biotite granite	73.84	0.017	14.09	1.4			0.13	0.19	0.89	3.93	3.25	0.01	1397	10.91	40.7	65.47	5.45	29.71		20.54	19.3043	128.048	2.20364	7.46789		693.953	Yuan, 2007
	LZL-3		74.27	0.022	13.19	1.34			0.1	0.1	0.64	3.71	4.43	0.013	1785	9.86	79.69	70.53	7.5	30.19		13.86	20.5936	181.034	2.3362	10.6253		737.057
	LZL-4		75.1	0.037	12.7	1.4			0.08	0.23	0.62	3.55	4.02	0.011	1447	8.32	162.6	64.89	12.64	19.3		28.75	23.0528	173.918	3.36218	12.8639		800.662
	LZL-5		74.37	0.022	13.52	1.37			0.08	0.15	0.59	3.79	3.91	0.011	1368	6.66	118.5	62.84	8.97	16.37		22.07	23.7169	205.405	3.83873	13.2107		775.687
	LZL-7		74.73	0.014	13.19	0.93			0.08	0.13	0.52	4.3	3.88	0.013	1425	6.56	168.6	44.68	12.45	15.46		29.09	22.5935	217.226	2.89004	13.5422		798.617
	LZL-8		75.22	0.029	12.69	1.41			0.09	0.11	0.63	3.38	4.57	0.013	1433	11.14	62.22	64.44	8.16	36.77		11.8	26.4629	128.636	1.75252	7.625		718.631
	LZL-16		75.04	0.03	12.57	1.43			0.09	0.25	0.63	3.65	4.08	0.013	1676	10.22	78.48	65.52	6.67	21.14		19.79	20.2001	163.992	3.09934	11.7661		736.451
	JFL-13	Biotite granite	73.82	0.02	13.64	1.78			0.12	0.19	0.93	3.2	3.97	0.01	1998	10.84	76.35	60.94	8.67	31.29	232.9	19.4	16.4878	184.317	1.94759	8.80623		742.41	Xuan et al., 2014
	JFL-14		75.2	0.03	12.6	1.31			0.08	0.17	0.63	3.3	4.26	0.01	1625	18.19	100.1	3.89	8.66	19.81	60.1	20.9	21.7532	89.3348	0.196365	11.5589		759.667
	JFL-15		73.6	0.02	13.6	1.67			0.11	0.19	0.85	3.2	4.12	0.02	2059	10.93	65.84	58.87	8.11	29.98	226.7	31.1	16.6038	188.381	1.96364	8.11837		730.254
	JFL-16		74.2	0.03	13.2	1.41			0.09	0.17	0.75	3.47	4.33	0.01	1745	14.72	87.3	59.7	7.04	21.57	88.5	20	20.5901	118.546	2.76773	12.4006		746.847
	JFL-1-2	Biotite granite	74.33	0.03	13.54		1.06	0.54	0.09	0.06	0.88	2.87	5.01	0.01	1687	7.7	93.9	69.5	6.73	22.2			24.6428	219.091	3.13063	13.9525	0.509434	753.95	Wen et al., 2017
	JFL-1-8		74.54	0.04	13.6		0.95	0.51	0.09	0.14	0.91	1.54	5.77	0.01	1760	14.7	91.7	69.8	6.47	21.5			27.2038	119.728	3.24651	14.1731	0.536842	763.023
	JFL-2-6	Albite granite	70.6	0.01	16.3		0.22	0.03	0.01	0.03	3.44	3.45	3.56	0.01	1492	8.52	34.2	79.8	4.76	50.4			19.7992	175.117	1.58333	7.18487	0.136364	664.611
	JFL-2-11		72.52	0.02	15.63		0.16	0.05	0.01	0.04	2.23	3.7	3.82	0.01	1541	5.85	57.7	92.8	6.62	61.4			20.5697	263.419	1.5114	8.71601	0.3125	708.589
Shizhuyuan Sn-W deposit	SZY-23	The first-phase microfine-grained porphyritic biotite granite	74.28	0.2	12.85	0.51	0.4	0.07	0.02	0.27	2.43	2.66	4.98	0.06	664	108	150	63.4	5.77	6.78			62.234	6.14815	9.35103	25.9965	0.175	769.35	Guo et al., 2015
	SZY-24		73.65	0.22	13.09	1.29	0.76	0.45	0.03	0.35	1.77	2.59	5.5	0.07	763	76.4	157	55.3	6.56	7.2			59.8143	9.98691	7.68056	23.9329	0.592105	780.045
	SZY-25		73.98	0.2	12.99	0.93	0.65	0.21	0.02	0.31	1.76	2.85	5.38	0.06	682	85.9	146	56.1	5.9	6.74			65.4583	7.93946	8.32344	24.7458	0.323077	771.102
	SZY-26		73.7	0.23	13.17	1.33	0.87	0.36	0.02	0.36	1.6	2.81	5.5	0.07	661	86.9	153	55.7	6.2	6.95			69.0443	7.60644	8.01439	24.6774	0.413793	777.693
	SZY-27		74.44	0.21	12.91	1.21	0.73	0.4	0.02	0.31	1.56	2.84	5.41	0.06	659	81	155	58.9	6.81	7.66			68.1206	8.1358	7.6893	22.7606	0.547945	778.553
	SZY-28		74.24	0.24	12.99	1.33	0.91	0.32	0.02	0.33	1.5	2.87	5.29	0.07	623	97.1	164	46.2	6.41	6.32			70.4587	6.41607	7.31013	25.585	0.351648	785.431
	SZY-13	The second-phase fine-grained porphyritic biotite granite	73.31	0.27	13.47	0.39	0.34	0.01	0.03	0.39	1.74	2.54	6.79	0.11	734	87.6	165	40.6	6.16	6.16			76.761	8.379	6.59091	26.7857	0.0294118	775.932
	SZY-14		73.21	0.28	13.5	0.41	0.32	0.05	0.04	0.41	1.77	2.45	6.91	0.12	821	108	172	42.2	6.17	6.08			69.8396	7.60185	6.94079	27.8768	0.15625	779.298
	SZY-29		74.07	0.22	12.88	1.91	1.29	0.48	0.07	0.29	1.16	3.45	4.58	0.06	738	55.8	179	74.4	7.9	10.6			51.4963	13.2258	7.01887	22.6582	0.372093	795.59
	SZY-30		74.73	0.19	12.74	1.57	1.24	0.19	0.05	0.24	1.11	3.5	4.53	0.05	680	50.5	148	66.4	6.59	14.2			55.2785	13.4653	4.67606	22.4583	0.153226	779.201
	SZY-31		74.67	0.22	12.71	1.84	1.21	0.5	0.06	0.27	1.13	3.45	4.52	0.06	743	48.7	163	76.6	6.93	11			50.4797	15.2567	6.96364	23.5209	0.413223	787.593
	SZY-1	The third-phase medium-grained equigranular zinnwaldite granite	75.19	0.01	13.55	1.22	0.94	0.18	0.06	0.06	0.54	4.19	4.03	0.01	1293	6.79	33.8	38.5	3.7	24.8			25.8627	190.427	1.55242	9.13514	0.191489	673.544
	SZY-2		75.31	0.01	13.63	0.17	0.18	0	0.01	0.03	0.45	4.73	4.55	0.01	1106	6.16	42.2	27.9	5.13	20.7			34.1368	179.545	1.34783	8.22612		680.941
	SZY-3		76	0.01	13.33	0.61	0.54	0.01	0.03	0.03	0.5	3.91	4.53	0.01	1143	8.92	37	24.9	4.42	10.4			32.8866	128.139	2.39423	8.37104	0.0185185	679.32
	SZY-4		75.65	0.01	13.22	0.88	0.58	0.24	0.02	0.02	0.64	3.66	4.58	0.01	1361	8.82	47.2	28.5	4.65	16.6			27.9238	154.308	1.71687	10.1505	0.413793	696.82
	SZY-5		73.85	0.01	14.65	1.33	0.99	0.23	0.04	0.02	0.73	3.35	4.36	0.01	1502	13.6	37.2	27.3	5.06	25.3			24.087	110.441	1.07905	7.35178	0.232323	689.43
	SZY-6		75.55	0.01	13.51	0.76	0.61	0.08	0.02	0.03	0.6	4.42	3.8	0.01	1155	8.13	66.1	30.7	7.04	12.6			27.3004	142.066	2.43651	9.3892	0.131148	720.983
	SZY-7		74.25	0.01	14.15	1.58	1.08	0.38	0.05	0.03	0.78	3.29	4.2	0.01	1511	11.7	34.4	24	4.28	13.9			23.0649	129.145	1.72662	8.03738	0.351852	683.085
	SZY-12		77.38	0.03	11.77	1.27	0.8	0.38	0.03	0.15	0.65	3.23	4.04	0.01	792	20.9	76.9	43.1	6.22	15.3			42.3275	37.8947	2.81699	12.3633	0.475	736.037
	SZY-19		76.63	0.01	12.72	0.79	0.52	0.21	0.02	0.04	0.47	4.08	4.27	0.01	781	9.42	72.4	31.4	7.04	10.5			45.3674	82.9087	2.99048	10.2841	0.403846	726.045
	SZY-20		75.87	0.04	12.73	1.08	0.76	0.24	0.03	0.06	0.6	3.55	4.82	0.02	806	7.51	79.2	43.2	5.44	14.8			49.6225	107.324	2.91892	14.5588	0.315789	733.065
	SZY-21		77.74	0.04	11.44	1.12	0.66	0.39	0.04	0.06	0.6	3.21	4.34	0.01	717	8	85.3	37.3	5.12	7.58			50.227	89.625	4.92084	16.6602	0.590909	740.619
	SZY-22		76.34	0.01	12.91	0.27	0.23	0.01	0.01	0.06	0.46	3.89	5.04	0.01	1059	5.48	49.1	26.6	5.53	18.8			39.4913	193.248	1.41489	8.87884	0.0434783	694.281
	JCT-29	Porphyritic biotite granite	74.49	0.12	12.81		1.02	0.45	0.04	0.14	1.11	2.65	5.39	0.03	458	25	134	23	4.8	3.9			97.654	18.32	5.89744	27.9167	0.441176	775.53	Jiang et al., 2006
	SZY-19		74.87	0.11	12.6		1.03	0.5	0.04	0.17	1.16	2.82	5.23	0.03	687	25	153	41	6.7	4.7			63.1701	27.48	8.7234	22.8358	0.485437	783.829
	SZY-1	Equigranular biotite granite	75.86	0.05	12.67		0.5	0.52	0.03	0.12	0.9	3.49	4.8	0.01	695	10	77	36	4.7	8.9			57.309	69.5	4.04494	16.383		727.187
	SZY-20		75.92	0.05	12.41		0.44	0.84	0.03	0.15	0.85	3.24	4.57	0.01	697	14	72	43	4.7	7.9			54.4064	49.7857	5.44304	15.3191		726.396
	SZY-9		74.62	0.01	13.55		0.09	0.15	0.01	0.09	0.88	4.02	5.12	0.01	962	11	121	82	11.7	9.2			44.1633	87.4545	8.91304	10.3419		759.133
	QLS-1	Porphyritic biotite granite	72.4	0.34	12.98	2.45			0.03	0.52	1.45	3.18	5.23	0.09	383	98.9	228	21.2	7.38	2.15	3.49	4.09	113.31	3.8726	9.86047	30.8943		811.085	Chen B et al., 2014
	QLS-2		71.66	0.3	13.26	2.21			0.03	0.46	1.47	3.04	5.92	0.08	387	92.4	182	19.4	6.02	2.02	3.67	6.63	126.934	4.18831	9.60396	30.2326		787.581
	QLS-73		72.34	0.34	13.13	2.42			0.04	0.52	1.46	3.26	5.32	0.09	364	102	213	21.2	7.2	2.19	3.43	5.33	121.277	3.56863	9.68037	29.5833		803.629
	QLS-74		71.87	0.32	13.42	2.25			0.03	0.48	1.46	3.24	5.67	0.09	403	99.5	214	20.3	7.32	2.11	3.79	7.5	116.747	4.05025	9.62085	29.235		802.729
	QLS-76		72.48	0.32	13.12	2.31			0.03	0.51	1.44	3.25	5.26	0.09	329	88	167	19.6	5.53	2	2.98	6.13	132.665	3.73864	9.8	30.1989		783.288
	QLS-156		72.53	0.33	12.81	2.33			0.03	0.51	1.4	3.13	5.24	0.09	354	111	220	21.4	7.1	2.24	3.41	5.78	122.827	3.18919	9.55357	30.9859		808.174
	QLS-157		71.71	0.33	13.34	2.34			0.04	0.51	1.41	3.25	5.4	0.09	348	111	192	19.6	6.43	2.05	3.15	5.69	128.76	3.13514	9.56098	29.86		795.756
	QLS-158		72.59	0.32	12.96	2.43			0.03	0.51	1.46	3.27	5.18	0.09	359	87.5	202	19	6.76	2.01	3.36	6.46	119.73	4.10286	9.45274	29.8817		799.068
	QLS-115	Equigranular granite	74.43	0.02	14.01	0.62			0.03	0.42	0.62	5.24	4.37	0	789	8.03	30.8	20.9	4.62	19.7	10.5	10.2	45.9591	98.2565	1.06091	6.66667		654.163
	QLS-116		76.04	0.01	13.34	0.68			0.03	0.14	0.5	4.4	4.32	0	922	7.25	43.8	24.5	4.91	11.9	23.9	13.6	38.8794	127.172	2.05882	8.92057		687.406
	QLS-117		74.78	0.02	13.52	0.72			0.03	0.17	0.61	3.53	5.19	0	1036	9.69	31.3	26.7	3.41	14.1	18.2	13.7	41.5695	106.914	1.89362	9.17889		666.518
	QLS-119		75.07	0.02	13.46	0.69			0.03	0.16	1.07	3.72	4.58	0.01	742	11.1	30.7	24.1	3.92	17.4	46.4	20.4	51.2187	66.8468	1.38506	7.83163		661.992
	QLS-152		76.35	0.02	12.75	0.52			0.03	0.13	0.46	4.68	3.89	0	830	5.33	40.9	23.5	4.68	12.8	36.1	8.12	38.89	155.722	1.83594	8.73932		679.99
	QLS-154		75.11	0.02	13.53	0.81			0.05	0.15	0.45	4.21	4.53	0.01	935	6.28	27.5	25.1	3.12	14.2	38.3	22.3	40.2025	148.885	1.76761	8.8141		657.01
	QLS-155		75.82	0.02	13.06	0.78			0.04	0.19	0.54	3.99	4.43	0.02	963	8.56	45.5	27.8	4.97	16	24.8	16	38.1719	112.5	1.7375	9.15493		692.118
	QLS-46		75.47	0.04	12.59	0.72			0.03	0.18	0.66	3.98	4.76	0.03	623	9.71	61.2	33.1	4.01	6.77	11.1	10.4	63.3995	64.1607	4.88922	15.2618		706.843
	QLS-48		76.33	0.05	12.26	1.13			0.04	0.18	0.73	3.47	4.82	0.01	648	10.8	85.9	33.8	5.55	8.27	7.5	17.2	61.7218	60	4.08706	15.4775		736.476
	QLS-81		74.62	0.02	14.06	1.22			0.08	0.17	0.4	4.73	3.53	0.04	1002	4.71	28.7	23	4.17	8.23	63.7	27.6	29.233	212.739	2.79465	6.88249		664.197
	QLS-83		74.53	0.02	14.06	0.81			0.04	0.45	0.57	5	3.83	0	815	6.5	32.8	23.1	4.12	10.1	63.7	16	38.9949	125.385	2.28713	7.96117		665.896
	QLS-147		74.22	0.02	14.01	0.78			0.05	0.14	0.46	4.74	4.04	0.01	974	6.47	37.8	22.7	4.76	9.94	49.3	15.6	34.4183	150.541	2.2837	7.94118		678.39
	QLS-150		74.61	0.02	13.93	0.81			0.05	0.15	0.56	4.61	3.88	0.01	952	7.26	29.3	23.9	3.72	13.7	72.4	19.5	33.8191	131.129	1.74453	7.87634		662.034
	QLS-151		74.95	0.02	13.79	0.54			0.04	0.13	0.5	5.05	3.57	0.01	772	7.4	34.4	27	4.24	8.8	43.9	10.7	38.3723	104.324	3.06818	8.11321		670.532
	QLS-29		75.05	0.03	13.36	0.79			0.03	0.14	1.02	3.88	4.74	0	753	13.2	54.7	35.2	4.44	10.9	22.2	21.2	52.2336	57.0455	3.22936	12.3198		699.684
	Q1	Porphyritic biotite granite	75.2	0.14	12.61			1.5	0.05	0.14	0.08	2.29	4.87	0.03	774.3	37.5	110.4	66.6	9.6		53		52.1899	20.648		11.5		784.042	Mao et al., 1995
	Q2		76.01	0.15	13.5			1.37	0.06	0.17	0.74	2.62	5.03	0.03	696.5	52.4	127.1	59.6	11.7		22.9		59.9258	13.292		10.8632		785.038
	Q3		74.2	0.15	13			1.83	0.08	0.19	0.94	1.99	5.29	0.03	717.5	39.9	120.2	60.6	10.1		54		61.1787	17.9825		11.901		780.21
	Q4		77.2	0.14	12.4			1.09	0.05	0.12	0.73	2.81	4.97	0.03	625.1	57.3	123.6	65.2	11.5		9.4		65.9741	10.9092		10.7478		774.884
	Q5		76.95	0.14	11.88			1.49	0.06	0.12	0.64	2.64	4.35	0.03	571.4	40.2	113.5	66.3	9.9		15.3		63.1707	14.2139		11.4646		774.111
	490-46		75.12	0.16	13.03			1.72	0.09	0.18	1.03	2.89	4.95	0.04	723.1	50.5	177.9	60.3	9.8		20.1		56.8033	14.3188		18.1531		803.808
	490-18	Equigranular granite	74.81	0.01	13.96			0.18	0.06	0.03	0.72	2.85	4.12	0.02	1149.8	13.4	32.7	19.4	6.1		48.2		29.7332	85.806		5.36066		685.688
	490-19		75.03	0.02	13.64			0.89	0.06	0.02	0.75	3.59	4.14	0.01	1028.7	7.4	30.4	20.2	9.1		57.3		33.3948	139.014		3.34066		670.285
	490-20		77.95	0.02	12.13			0.57	0.05	0.02	0.49	3.34	4.02	0	779.2	13.3	31.7	24.2	8.3		24.1		42.8099	58.5865		3.81928		673.984
	490-21		75.79	0.02	13.84			0.96	0.06	0.03	0.65	3.62	4.89	0	1086.3	8	25.7	21.3	4.5		31.7		37.353	135.787		5.71111		655.309
	490-22		74.82	0.02	13.4			2.26	0.11	0.03	0.63	2.81	3.89	0.01	1007.4	8.1	39.9	24.9	7.3		44.6		32.0416	124.37		5.46575		700.192
	490-28		75.71	0.04	13.44			0.73	0.05	0.02	0.79	3.15	4.94	0.02	904.9	17.3	58.1	37.3	8.9		13.3		45.2995	52.3064		6.52809		714.901
	490-29		74.84	0.02	13.84			0.86	0.05	0.02	0.72	3.54	4.09	0	1105.2	20.3	24.6	13.5	6.5		92.8		30.7078	54.4433		3.78462		657.936
	490-31		77.84	0.04	11.95			0.48	0.05	0.05	1.67	2.13	5.07	0.02	685	46.1	36.9	＜1.5	5.7		1916.8		61.4164	14.859		6.47368		674.824
	490-32		78.68	0.03	10.92			0.49	0.05	0.02	1.79	2.11	4.43	0.01	682.3	59.7	35.4	＜1.5	6.6		2038.8		53.876	11.4288		5.36364		669.909
	490-33		77.85	0.04	11.62			0.64	0.06	0.05	1.36	2.29	4.75	0.01	600.9	39.8	42.9	＜1.5	7		1370.8		65.5931	15.098		6.12857		688.194
	SZY-21-02	P-1 porphyritic biotite granite	71.9	0.31	13.6	2.31			0.04	0.38	1.5	2.93	5.76	0.1	375	108	190	17.5	6.5	2.4	4	5	127.455	3.47222	7.29167	29.2308		796.797	Chen et al., 2016
	SZY-22		73.4	0.32	12.8	2.37			0.04	0.38	1.55	2.95	5.16	0.09	378	98	209	19.9	6.4	2.4	6	6	113.273	3.85714	8.29167	32.6562		805.327
	SZY-23-01		72.9	0.27	13	2.1			0.03	0.35	1.27	2.83	5.57	0.08	390	109	180	17.7	6	2.3	5	7	118.511	3.57798	7.69565	30		795.492
	SZY-34-01		73	0.32	12.5	2.43			0.04	0.38	1.39	3.03	4.74	0.09	383	88	218	20.8	6.5	2.7	5	6	102.694	4.35227	7.7037	33.5385		812.582
	SZY-38		71.8	0.29	13.4	2.21			0.04	0.35	1.35	2.86	5.98	0.08	421	90.5	196	19.2	6.9	2.5	4	7	117.865	4.65193	7.68	28.4058		799.438
	SZY-39		73.7	0.32	12.3	2.43			0.04	0.39	1.27	2.92	4.98	0.09	370	75.3	207	19.9	6.9	2.7	4	6	111.685	4.91368	7.37037	30		807.889
	SZY-05	P-2 equigranular biotite granite	73.9	0.01	14.1	0.9			0.03	0.02	1.01	3.66	4.39	0.01	1175	25.4	40	27.4	4.8	28.4	82	32	31.0023	46.2598	0.964789	8.33333		686.049
	SZY-06		75.3	0.01	13.8	0.16			<0.01	0.14	0.66	3.94	4.59	0	857	17.2	35	22.8	4.1	18.7	22	8	44.4425	49.8256	1.21925	8.53659		674.986
	SZY-07		73.8	0.01	14.9	0.84			0.05	0.01	0.39	4.62	4.14	0	1100	4.7	20	15.5	2.4	14.2	56	40	31.2302	234.043	1.09155	8.33333		640.64
	SZY-11-01		75.8	0.01	13.3	0.32			0.02	0.03	0.52	4.41	4.63	0.01	773	13.3	54	26.7	4.9	15.9	7	8	49.7014	58.1203	1.67925	11.0204		699.534
	SZY-11-02		75.3	0.01	13.4	0.39			0.02	0.02	0.52	4.11	4.83	0.01	995	7.9	56	28.8	5.2	15.2	30	8	40.2801	125.949	1.89474	10.7692		704.707
	SZY-12		75.6	0.01	13.5	0.26			0.01	0.03	0.33	3.62	5.14	0.01	945	15.5	44	29.8	4.5	20.5	13	9	45.1334	60.9677	1.45366	9.77778		693.505
	SZY-13		75.7	0.01	13.6	0.22			0.01	0.02	0.47	4.59	4.56	0.01	848	10.3	40	26	3.9	15.7	37	6	44.6206	82.3301	1.65605	10.2564		678.598
	SZY-15		76.5	0.01	12.9	0.73			0.03	0.09	0.57	3.71	4.42	0.01	914	13.5	57	29.9	5.8	19.2	15	13	40.1276	67.7037	1.55729	9.82759		711.378
	SZY-16		73.5	0.01	14.4	1.27			0.08	0.12	0.88	3.71	3.79	0.01	1190	11	39	25.2	5.8	25.5	158	27	26.4277	108.182	0.988235	6.72414		690.732
	SZY-26-03		75.3	0.01	13.1	1.4			0.06	0.06	0.95	2.87	4.63	0.01	886	25.6	64	41.6	5.3	18.6	131	51	43.3625	34.6094	2.23656	12.0755		724.846
	SZY-36		75.1	0.01	13.2	0.9			0.04	0.02	0.59	3.46	4.96	0.01	947	6	77	40.7	6	18.4	32	23	43.4609	157.833	2.21196	12.8333		734.159
	SZY-37		76.3	0.01	13	1.25			0.05	0.02	0.53	3.73	4.54	0.01	940	6.6	61	38.3	4.8	14.55	29	21	40.077	142.424	2.6323	12.7083		716.331
Xiangyuan Sn-W deposit	JJL-01	Biotite granite	76.18	0.11	12.68		1.02	0.21	0.03	0.09	0.69	3.55	4.92	0.03	653.64	9.26	133.11	37.68	6.94	9.03	23	12.33	62.4587	70.5875	4.17276	19.1801	0.205882	772.682	Su, 2017
	JJL-04		75.49	0.11	12.5		1.02	0.29	0.02	0.09	0.79	3.55	4.44	0.02	520.36	13.21	106.74	32.32	5.27	5.8	16.67	11.37	70.802	39.3914	5.57241	20.2543	0.284314	755.898
	JJL-10		76.51	0.1	12.63		1.26	0.19	0.03	0.08	0.7	3.29	4.98	0.03	631.02	23.06	135.92	32.99	6.54	5.34	9.98	26.56	65.4867	27.3643	6.1779	20.7829	0.150794	777.225
	JJL-18		75.88	0.1	12.12		1.19	0.32	0.03	0.08	0.65	3.03	5.1	0.02	475.51	10.7	106.38	29.8	5.06	3.54	3.99	14.38	88.9974	44.4402	8.41808	21.0237	0.268908	756.533
	JJL-11	Two-mica granite	74.62	0.11	13.16		1.17	0.23	0.03	0.07	0.68	3.43	5.51	0.02	581.82	11.04	155.88	31.86	7.16	5.27	8.62	23.06	78.5832	52.7011	6.04554	21.7709	0.196581	784.881
	JJL-12		74.73	0.13	13.33		1.13	0.36	0.03	0.07	0.77	3.49	5.15	0.03	601.02	18.11	152.25	33.89	6.99	5.3	7.2	30.3	71.1025	33.1872	6.39434	21.7811	0.318584	785.143
	JJL-17		76.27	0.14	11.85		1.51	0.32	0.04	0.08	0.59	2.97	4.94	0.03	525.06	20.14	145.81	39.79	6.62	5.38	10.79	17.6	78.0701	26.0705	7.39591	22.0257	0.211921	784.651
	JJL-09		75.28	0.1	12.68		1.38	0.08	0.03	0.08	0.75	3.42	4.48	0.03	628.3	14.57	133.98	30.11	6.45	5.72	25.11	34.75	59.1667	43.1229	5.26399	20.7721	0.057971	778.059
	PXM-01	Two-mica granite	76.94	0.05	12.5		0.81	0.25	0.03	0.02	0.21	3.41	4.86	0.01	897.14	3.23	124.27	47.22	7.04	8.62	16.34	29.31	44.9514	277.752	5.47796	17.652	0.308642	776.267
	PXM-02		76.23	0.05	12.67		0.88	0.19	0.03	0.02	0.63	3.85	4.65	0.01	797.98	2.79	141.75	53.53	8.04	6.61	5.57	27.7	48.3535	286.014	8.09834	17.6306	0.215909	777.373
	PXM-03		76.1	0.05	12.68		0.95	0.12	0.03	0.06	0.7	3.41	4.7	0.01	891.67	6.28	119.15	50.99	6.98	8.91	14.28	28.38	43.7382	141.986	5.72278	17.0702	0.126316	767.548
	PXM-04		75.23	0.05	12.91		1.06	0.03	0.03	0.01	0.64	3.9	4.64	0.01	805.56	3.37	128.92	48.32	7.52	8.08	6.83	32.16	47.7955	239.039	5.9802	17.1436	0.0283019	769.727
	PXM-05		76.88	0.03	12.2		0.84	0.11	0.06	0.22	0.67	2.53	4.57	0.01	1181.23	4.81	120.63	62.37	8.54	19.17	9.07	36.57	32.1032	245.578	3.25352	14.1253	0.130952	780.464
	PXM-06		76.97	0.01	12.42		0.61	0.16	0.05	0	0.38	4.51	3.57	0.01	916.77	1.18	78.72	19.26	7.36	9.82	22.39	19.06	32.3128	776.924	1.9613	10.6957	0.262295	732.571
	PXM-07		76.33	0.01	12.93		0.88	0.05	0.06	0	0.49	3.92	3.9	0.01	1105.82	1.91	69.07	27.01	5.96	12.43	49.6	26.17	29.2649	578.963	2.17297	11.5889	0.0568182	728.46
	PXM-08		76.62	0.02	12.44		0.75	0.12	0.06	0	0.44	3.48	4.86	0.01	1370.46	2.25	73.48	32.79	6.2	14.45	110.24	27.94	29.4264	609.093	2.2692	11.8516	0.16	728.751
Jurassic W deposits
Xihuashan W deposit	XHS-3	The first medium-grained porphyritic biotite granite	75.95	0.13	12.82	1.4	0.8	0.51	0.07	0.22	0.64	3.03	4.95	0.05	484	47.3	96.9	29.1	4.08	7.5				10.2326	3.88	23.75	0.6375	754.744	Guo et al., 2012
	XHS-4		75.39	0.12	12.95	1.57	0.94	0.52	0.07	0.2	0.47	2.85	5.27	0.04	475	36.5	152	29.6	6.95	9.64				13.0137	3.07054	21.8705	0.553191	795.73
	XHS-7		75.84	0.08	12.83	1.23	0.87	0.26	0.07	0.16	1	3.39	4.56	0.02	487	47.2	99.8	23.5	4.8	7.99				10.3178	2.94118	20.7917	0.298851	750.713
	XHS-8		76.47	0.07	12.73	1.17	0.78	0.3	0.07	0.16	0.9	3.35	4.66	0.03	515	37.4	86.8	22.5	4.54	7.91				13.7701	2.8445	19.1189	0.384615	740.212
	XHS-9		74.53	0.09	13.25	1.28	0.88	0.31	0.07	0.17	0.96	3.42	4.86	0.04	588	55.6	85.3	21	4.13	8.8				10.5755	2.38636	20.6538	0.352273	737.55
	XHS-10		74.71	0.1	13.31	1.24	0.94	0.2	0.07	0.19	1.09	3.36	4.95	0.03	461	66.6	84.6	17.1	4.19	7.23				6.92192	2.36515	20.1909	0.212766	735.517
	XHS-11		77.01	0.1	12.1	1.45	1.02	0.32	0.08	0.2	0.98	3.18	4.5	0.03	480	42	109	22.9	5.15	8.55				11.4286	2.67836	21.165	0.313725	757.279
	XHS-25		74.61	0.14	13.42	1.59	1.13	0.33	0.06	0.29	1.35	2.86	5.15	0.04	461	81.8	118	22.7	5.46	6.6				5.6357	3.43939	21.6117	0.292035	764.088
	XHS-30		75.51	0.09	12.69	1.35	0.88	0.37	0.07	0.15	1.03	3.23	4.81	0.03	467	41.3	91.7	28.8	4.11	7.08				11.3075	4.0678	22.3114	0.420455	742.326
	XHS-31		76.05	0.08	12.62	1.18	0.77	0.33	0.07	0.13	0.92	3.22	4.88	0.02	470	35.8	96.5	28.1	4.29	6.9				13.1285	4.07246	22.4942	0.428571	747.417
	XHS-32		76.45	0.09	12.41	1.38	0.91	0.36	0.08	0.16	0.95	3.12	4.84	0.03	475	37.9	128	33.1	5.69	7.74				12.533	4.27649	22.4956	0.395604	770.72
	XHS-33		75.15	0.09	13.06	1.31	0.89	0.32	0.07	0.15	1.01	3.19	5.19	0.03	511	45.2	89.1	23.5	3.84	5.62				11.3053	4.18149	23.2031	0.359551	739.591
	XHS-34		76.78	0.09	11.99	1.38	0.94	0.34	0.08	0.15	0.88	3.09	4.69	0.03	463	34.2	95.3	23.2	4.36	7.02				13.538	3.30484	21.8578	0.361702	746.657
	XHS-35		74.77	0.09	13.26	1.17	0.78	0.3	0.07	0.14	1.04	3.43	5.07	0.03	492	54.8	98.5	23.5	4.69	6.43				8.9781	3.65474	21.0021	0.384615	746.168
	X09-3	The second garnet-bearing fine-grained biotite granite	75.79	0.02	13.07	0.86	0.54	0.26	0.12	0.05	0.46	3.99	4.4	0.01	725	7.85	68.5	28.6	5.23	12.4				92.3567	2.30645	13.0975	0.481481	723.641
	X09-4		76.31	0.01	13.02	0.75	0.56	0.13	0.12	0.06	0.51	4.14	4.48	0.01	717	7.58	104	33.2	9.54	14.3				94.591	2.32168	10.9015	0.232143	753.263
	X09-5		76.01	0.02	12.94	0.78	0.56	0.15	0.11	0.07	0.54	3.92	4.63	0.01	707	10	73.5	31.1	5.47	14				70.7	2.22143	13.4369	0.267857	726.275
	XHS-1		76.8	0.01	12.66	0.79	0.62	0.1	0.11	0.04	0.6	3.8	4.69	0.01	770	7.19	70.7	35.4	5.52	13.1				107.093	2.70229	12.808	0.16129	722.152
	XHS-2		76.03	0.01	13.06	0.86	0.61	0.18	0.11	0.04	0.55	4.02	4.66	0.01	772	6.69	68.7	39	5.49	14.6				115.396	2.67123	12.5137	0.295082	720.057
	XHS-12		75.67	0.01	13.26	0.65	0.42	0.19	0.06	0.04	0.54	3.99	4.71	0.01	826	7.3	59.6	29.3	4.9	15				113.151	1.95333	12.1633	0.452381	710.523
	XHS-13		75.52	0.02	13.01	0.77	0.51	0.21	0.08	0.05	0.6	4.11	4.58	0.01	764	8.85	67.5	29.4	5.24	16.9				86.3277	1.73964	12.8817	0.411765	717.116
	XHS-14		75.69	0.02	12.93	0.75	0.55	0.14	0.1	0.05	0.64	4.13	4.36	0.01	742	7.62	62.2	29.6	4.96	13.7				97.3753	2.16058	12.5403	0.254545	711.626
	XHS-21		76.09	0.02	12.95	0.85	0.56	0.23	0.09	0.06	0.65	4.14	4.35	0.01	783	6.71	84.3	33.4	6.86	17				116.692	1.96471	12.2886	0.410714	735.019
	XHS-22		76.2	0.02	12.91	0.82	0.54	0.22	0.08	0.06	0.71	4.04	4.35	0.01	748	13.2	76.2	28.7	5.3	12.5				56.6667	2.296	14.3774	0.407407	727.445
	XHS-23		75.81	0.01	13.02	0.83	0.56	0.21	0.08	0.04	0.59	4.02	4.66	0.01	803	7.67	70.4	25.5	5.46	12.5				104.694	2.04	12.8938	0.375	721.094
	XHS-24		76.19	0.02	13.11	0.82	0.49	0.28	0.07	0.04	0.58	4.13	4.41	0.01	778	6.29	71.8	28.6	5.72	13.6				123.688	2.10294	12.5524	0.571429	724.108
	XHS-15	The third garnet-bearing fine-grained porphyritic biotite granite	75.33	0.08	12.96	1.61	1.09	0.4	0.1	0.12	0.7	3.49	4.51	0.03	888	25.4	109	36.5	5.78	14.1				34.9606	2.58865	18.8581	0.366972	761.819
	XHS-16		75.59	0.07	12.74	1.34	0.5	0.78	0.1	0.13	0.59	3.45	4.52	0.03	781	21.4	105	30.9	5.46	14.7				36.4953	2.10204	19.2308	1.56	759.766
	XHS-17		74.97	0.09	13.43	1.58	1.5		0.1	0.13	0.75	3.58	4.64	0.03	929	29.4	109	25.5	5.73	11.7				31.5986	2.17949	19.0227		761
	XHS-18		75.82	0.08	13.06	1.2	0.81	0.3	0.1	0.13	0.57	3.51	4.78	0.03	818	22.3	92.5	36.5	5.07	17.5				36.6816	2.08571	18.2446	0.37037	748.496
	XHS-19		75.88	0.06	13.09	1	0.65	0.28	0.1	0.11	0.7	3.73	4.54	0.02	814	21.2	82.4	33.3	5.14	17.6				38.3962	1.89205	16.0311	0.430769	736.932
	XHS-20		75.1	0.08	12.94	1.34	0.93	0.3	0.09	0.15	0.69	3.6	4.55	0.03	792	23.6	92.1	33.5	4.82	14.1				33.5593	2.37589	19.1079	0.322581	746.219
	XHS-26		78.07	0.04	12.08	0.78	0.48	0.25	0.09	0.08	0.44	3.71	4.23	0.02	703	9.96	76.7	46	5.4	15				70.5823	3.06667	14.2037	0.520833	732.88
	XHS-27		76.03	0.07	13	1.09	0.71	0.3	0.07	0.13	0.6	3.54	4.87	0.03	814	22.1	94.4	36.2	5.17	13.7				36.8326	2.64234	18.2592	0.422535	748.28
	XHS-28		76.26	0.03	12.66	0.79	0.54	0.19	0.09	0.06	0.52	3.88	4.7	0.01	727	9.11	87.7	39.3	5.82	18.1				79.8024	2.17127	15.0687	0.351852	738.71
	XHS-29		76.29	0.03	12.84	0.82	0.6	0.15	0.09	0.05	0.55	4.03	4.48	0.01	791	7.71	67.6	43.1	4.93	26.2				102.594	1.64504	13.712	0.25	719.053
	X-1	Medium-grained porphyritic biotite granite	73.85	0.06	12.66		0.84	0.15	0.06	0.46	1.29	3.63	4.46	0.02	625	35.5	87.8	22.6	5.04	10.8	1460	9.35		17.6056	2.09259	17.4206	0.178571	731.723	Yang et al., 2012
	X-2		74.51	0.09	13.73		1.04	0.3	0.07	0.15	0.96	3.68	4.76	0.03	666	48.8	74	18.9	3.99	7.98	679	12.7		13.6475	2.36842	18.5464	0.288462	726.491
	X-4		75.6	0.08	13.33		1.1	0.25	0.07	0.14	0.93	4.55	4.27	0.03	662	37.8	79	13.5	4.34	5.46	6.78	12.6		17.5132	2.47253	18.2028	0.227273	722.869
	X-5		75.55	0.09	13.45		1.15	0.31	0.07	0.16	0.98	4.07	4.43	0.03	628	41	102	20.2	5.35	7.57	4.2	11.9		15.3171	2.66843	19.0654	0.269565	747.977
	X-6		75.1	0.1	12.82		1.19	0.32	0.08	0.18	0.89	5.23	4.21	0.03	623	39.4	104	23.1	4.84	9.48	4.25	10.5		15.8122	2.43671	21.4876	0.268908	732.09
	X-18		74.38	0.09	13.09		0.88	0.37	0.07	0.13	0.99	3.8	4.74	0.02	561	48.1	87.3	16.6	4.27	5.65	1260	9.41		11.6632	2.93805	20.445	0.420455	733.878
	X-19		74.77	0.09	12.67		0.85	0.34	0.07	0.12	1.03	4.11	4.33	0.02	610	46.6	103	20.4	5.01	6.8	1430	12		13.0901	3	20.5589	0.4	743.324
	X-21		75.39	0.07	13.01		0.75	0.24	0.06	0.08	0.89	3.79	4.65	0.01	655	34.6	78.1	23.9	4.48	8.73	1400	11.4		18.9306	2.73769	17.433	0.32	727.664
	X-8	Medium-grained biotite granite	76.26	0.02	13.05		0.45	0.16	0.11	0.03	0.49	4.69	4.41	0.003	948	10.4	63.2	25.7	5.65	13.8	1320	9.71		91.1538	1.86232	11.1858	0.355556	708.146
	X-9		75.58	0.02	12.99		0.62	0.23	0.09	0.03	0.59	4.24	4.24	0.003	943	7.94	59.4	40.8	5.36	30.3	17	21.4		118.766	1.34653	11.0821	0.370968	708.677
	X-11		75.7	0.02	12.93		0.71	0.25	0.1	0.02	0.61	4.26	4.42	0.002	1001	7.44	58.7	36.6	5.06	29.1	8.72	15.4		134.543	1.25773	11.6008	0.352113	705.377
	X-12		76.1	0.02	13.49		0.48	0.22	0.1	0.04	0.57	4.93	4.23	0.003	994	7.01	74.7	30.5	6.03	14.1	1190	17.4		141.797	2.16312	12.3881	0.458333	720.642
	X-13		75.7	0.03	12.96		0.52	0.23	0.09	0.03	0.64	4.61	4.23	0.005	949	12.7	75.2	30.1	5.52	13.9	1480	21.9		74.7244	2.16547	13.6232	0.442308	721.007
	X-14		75.85	0.02	12.87		0.5	0.19	0.08	0	0.55	4	4.64	0.002	1091	7.54	66.3	27	5.85	12.4	1460	9.71		144.695	2.17742	11.3333	0.38	716.734
	X-16		75.4	0.02	12.96		0.59	0.24	0.07	0.01	0.57	4.19	4.47	0.001	1031	8.2	75.9	27.6	6.48	16.8	1500	7.71		125.732	1.64286	11.713	0.40678	726.066
	X-17		75.71	0.02	12.95		0.56	0.17	0.1	0	0.56	4.18	4.36	0.001	1011	7.08	72.2	28.5	6.39	14.1	1380	13.6		142.797	2.02128	11.2989	0.303571	723.569
	X-20		76.1	0.02	12.87		0.44	0.28	0.08	0.03	0.62	4.65	4.16	0.003	991	8	63	28.4	5.39	14.5	1410	22		123.875	1.95862	11.6883	0.636364	707.599
	X-22		76.49	0.02	12.51		0.53	0.29	0.09	0.06	0.66	4.18	4.36	0.003	949	8.11	71.6	28.3	6.22	13.6	1500	6.56		117.016	2.08088	11.5113	0.54717	718.977
	X-23		75.43	0.02	12.93		0.48	0.27	0.11	0.01	0.59	4.28	4.14	0.001	951	6.91	59.6	29.1	5.41	12.3	1610	13.5		137.627	2.36585	11.0166	0.5625	708.966
	X-10	Fine-grained two-mica granite	76.42	0.02	13.08		0.6	0.27	0.15	0.03	0.51	4.6	4.23	0.001	983	5.1	55.9	26.2	5.07	11.4	5.64	17.4		192.745	2.29825	11.0256	0.45	701.505
	X-7		75.7	0.02	13.06		0.75	0.24	0.07	0.02	0.6	4.59	4.25	0.004	971	8.41	65.9	34.6	5.72	17.4	9.45	15.3		115.458	1.98851	11.521	0.32	712.078
Piaotang W deposit	PT03	K-feldspar granite	73.97	0.08	13.87			1.09	0.14	0.01	0.72	4.19	4.9	0.02	602	14.2	64.4	36.5	4.68	9.77	29.6	4.84		42.3944	3.73593	13.7607		712.372	He et al., 2010
	PT06		72.78	0.09	14.49			2.67	0.56	0.04	1.13	2.05	4.1	0.03	1010	7.46	82.7	18.8	4.99	4.01	187	9.22		135.389	4.68828	16.5731		761.864
	PT11		74.57	0.08	13.4			1.24	0.16	0.06	0.87	3.29	4.9	0.03	522	23	83	38.7	5.65	9.32	20.2	4.51		22.6957	4.15236	14.6903		739.068
	PT-01	Biotite monzogranite	76.61	0.11	12.36		0.8	1.05	0.17	0	0.65	3.15	4.88	0.02	691	11.2	89	31.6	6.27	11.5	26.5	211		61.6964	2.74783	14.1946	1.3125	744.087	Hua et al., 2003
	PT-03		76.63	0.12	12.38		0.93	1.28	0.08	0.07	0.72	3.43	4.26	0.02	676	20.3	78.2	27.1	4.96	11.5	18.9	161		33.3005	2.35652	15.7661	1.37634	734.383
	PT-04		76.96	0.12	12.37		0.77	1.09	0.07	0.05	0.75	3.33	4.64	0.02	559	23.2	85.8	33.3	4.57	8.58	13.7	3.82		24.0948	3.88112	18.7746	1.41558	739.484
	PT-06		76.55	0.1	12.6		0.79	0.93	0.1	0.02	0.63	3.57	4.59	0.02	595	12.9	69.8	36.4	4.73	12.6	15.1	17.9		46.124	2.88889	14.7569	1.17722	723.607
	PT-07		75.38	0.09	12.87		0.44	0.74	0.1	0.07	0.61	3.81	4.46	0.02	589	10	64	30	5.04	11.7	13.3	3.3		58.9	2.5641	12.6984	1.68182	716.688
Tieshanlong W deposit	TS-5	The main-phase coarse-medium grained porphyritic biotite granite	75.3	0.03	13.7		0.47	0.09	0.12	0.47	1.42	0.13	5.17	0.04	908	17.3	56.6	62.5	4.16	20.5	17.3	41.3		52.4855	3.04878	13.6058	0.191489	740.449	Li, 2011
	TS9-1		76	0.04	13.3		0.88	0.02	0.11	0.07	0.55	3.32	4.86	0.05	916	9.5	62.8	66.1	3.86	26.7	22	60.7		96.4211	2.47566	16.2694	0.0227273	721.637
	TS9-3		75.9	0.04	13.5		0.75	0.15	0.09	0.07	0.61	3.69	4.43	0.05	813	6.2	64.4	58.8	4.44	17.5	17.6	53.7		131.129	3.36	14.5045	0.2	722.678
	TS9-4		76	0.04	13.5		0.75	0.27	0.12	0.12	0.5	3.14	4.48	0.08	985	11.1	47.3	63.2	3.02	25.6	27.2	76.4		88.7387	2.46875	15.6623	0.36	706.995
	TS9-24		73.4	0.13	14.4		1.03	0.39	0.11	0.22	0.88	3.16	5.16	0.19	643	44.1	100	41.4	3.49	14.1	14.3	39.2		14.5805	2.93617	28.6533	0.378641	757.82
	TS9-5		76.1	0.06	13.8		1.23	0.16	0.17	0.17	0.43	0.13	5.82	0.05	1190	7.8	64.8	61.2	3.56	20.2	18.4	90.3		152.564	3.0297	18.2022	0.130081	759.24
	TS-7	Two-mica granite and muscovite granite	75.5	0.04	13.7		0.61	0.06	0.09	0.33	0.6	3.08	4.6	0.05	940	11.5	49.1	63.7	3.71	23.6	13.3	48.8		81.7391	2.69915	13.2345	0.0983607	709.054
	TS-26		77.1	0.03	13.7		1.21	0.15	0.18	0.09	0.29	3.11	3.73	0.07	909	4.4	24.1	103.6	1.82	19.3	75.4	130.6		206.591	5.36788	13.2418	0.123967	668.08
	TSY-1		76.7	0.02	13.4		0.69	0.12	0.16	0.17	0.48	3.57	3.75	0.06	943	7.9	37.1	85.6	3.97	42.2	18.9	72.6		119.367	2.02844	9.34509	0.173913	689.879
	TSY-7		76.5	0.01	13.5		0.63	0.14	0.17	0.16	0.57	2.81	3.99	0.06	899	12.5	43.7	61.4	4.87	30.6	114	62.3		71.92	2.00654	8.97331	0.222222	708.205
Yaogangxian W deposit	YGX-21-7	Coarse-grained two-mica granite	75.62	0.03	12.75			0.86	0.14	0.01	0.56	3.62	4.57	0.01	624	6.55	50.5	36.2	4.48	16.4	290	45.1		95.2672	2.20732	11.2723		700.908	Dong et al., 2014
	YGX-23-8		75	0.04	12.85			1.13	0.11	0.02	0.63	3.39	4.76	0.02	646	12.1	97.2	35.9	5.61	9.64	13.6	52.9		53.3884	3.72407	17.3262		752.216
	YGX-23-12		74.68	0.05	12.98			1.08	0.1	0.04	0.77	3.58	4.64	0.01	606	37.6	63.4	30.3	3.72	8.96	9	51		16.117	3.3817	17.043		715.815
	YGX-23-14		74.34	0.07	13.15			1.23	0.07	0.1	0.9	3.56	4.57	0.02	458	31.6	75.8	25.7	3.79	7.07	4.5	20		14.4937	3.63508	20		729.3
	YGX-23-15		74.4	0.05	12.94			1.11	0.1	0.03	0.73	3.57	4.61	0.02	626	16.6	82.1	34.5	5.1	10.5	8.3	38.3		37.7108	3.28571	16.098		736.432
	YGX-23-17		74.99	0.04	12.88			1.06	0.09	0.04	0.66	3.76	4.53	0.02	617	7.19	68	32.9	4.97	12.4	37.7	49.5		85.8136	2.65323	13.6821		720.782
	YGX-23-24		75.31	0.04	12.83			0.87	0.11	0.01	0.6	3.85	4.42	0.01
	YGX-19-2	Coarse- to medium-grained two-mica granite	75.66	0.03	12.53			1.09	0.14	0	0.52	3.6	4.39	0.01	639	3.78	48	33.9	3.99	12.6	232	160.3		169.048	2.69048	12.0301		698.164
	YGX-19-3		74.49	0.02	12.92			0.88	0.13	0.03	0.52	3.67	4.88	0.01	648	3.69	70.3	33.2	5.56	14.4	6.9	40.7		175.61	2.30556	12.6439		723.612
	YGX-19-12		75.77	0.03	12.92			0.86	0.14	0.02	0.61	4.09	4.36	0.01	539	4.43	70.1	37.8	4.85	11.2	7.7	27.8		121.67	3.375	14.4536		721.568
	YGX-19-18		75.69	0.03	12.92			0.98	0.11	0.01	0.58	3.97	4.41	0.01	516	5.92	57.1	37.2	4.17	10.7	9.3	48.9		87.1622	3.47664	13.693		707.509
	YGX-21-10		75.57	0.02	12.79			0.95	0.16	0.02	0.6	3.33	4.68	0.01
	YGX-21-12		75.86	0.03	12.58			1	0.15	0.01	0.53	3.72	4.34	0.01	576	4.3	53.5	34.1	3.97	13	7.4	40.1		133.953	2.62308	13.4761		705.281
	YGX-23-13		74.75	0.03	13.24			0.89	0.11	0.04	0.63	3.93	4.55	0.01	596	8.72	70	33.3	4.84	10	10.8	40.8		68.3486	3.33	14.4628		723.095
	YGX-23-21		74.74	0.03	13.01			0.98	0.13	0.04	0.53	4.13	4.43	0.01	597	6.25	61.6	34.1	5.15	11.6	13	39.3		95.52	2.93966	11.9612		711.787
	YGX-23-29		76.65	0.03	12.65			0.91	0.13	0.03	0.6	3.93	4.39	0.01	443	7.7	69.2	30.9	4.82	8.6	4.5	17		57.5325	3.59302	14.3568		721.223
	YGX-16-7	Fine-grained muscovite granite	76.67	0.03	13.09			0.96	0.16	0.01	0.53	3.38	5.07	0.01	679	4.73	58.8	34.7	4.46	12.1	8.7	57		143.552	2.86777	13.1839		713.601
	YGX-16-13		75.11	0.03	13.05			0.87	0.08	0.02	0.51	4.35	4.73	0.01	600	6.04	62.3	32.5	4.95	9.46	6.5	26.3		99.3377	3.43552	12.5859		707.945
	YGX-23-4		75.72	0.03	12.62			0.96	0.1	0	0.55	4.03	4.28	0.01	548	4.98	59.8	33.4	4.57	10.2	7.1	34.7		110.04	3.27451	13.0853		710.013
	YGX-23-25		75.32	0.03	12.72			0.92	0.12	0	0.56	4.1	4.3	0.01	575	4.26	69.9	36.1	5.23	11.3	5.6	30.6		134.977	3.19469	13.3652		721.084
	YGX-1-1		76.55	0.02	12.99			0.82	0.12	0.08	0.51	4.21	4.18	0.01	652	1.96	71.9	35.3	5.92	12.9	6	33.9		332.653	2.73643	12.1453		725.489
	YGX-1-2		77.04	0.02	12.91			0.83	0.11	0	0.49	4.16	4.03	0.01	626	1.34	66.9	34.1	5.34	11.4	4.4	33.6		467.164	2.99123	12.5281		721.948
	YGX-1-3		75.89	0.02	12.9			0.68	0.14	0	0.48	4	4.22	0.01	649	2.1	64.1	28.8	5.36	10	5.7	36.7		309.048	2.88	11.959		718.948
	YGX-1-7		76.8	0.02	12.71			0.82	0.14	0	0.45	3.72	4.27	0.01	707	3	56	21.4	5.07	13.5	4.7	54.1		235.667	1.58519	11.0454		711.463
Pangushan W deposit	NLSD2-1348	K-feldspar granite	76.57	0.11	12.31		1.06	0.25	0.08	0.1	0.83	3.21	5.04	0.02	351	62.3	110	18.1	5.17	1.92	1.84	4.64		5.63403	9.42708	21.2766	0.235849	756.07	Fang et al., 2016
	NLSD2-1522		73.72	0.16	12.85		1.35	0.67	0.09	0.22	1.14	3.31	4.77	0.03	328	38.9	91.4	34.7	4.48	4.16	632	8.53		8.43188	8.34135	20.4018	0.496296	739.378
	NLSD2-1880		76.14	0.09	12.8		0.95	0.34	0.12	0.17	1.03	3.49	4.54	0.03	247	33.5	63.4	36.1	3.46	8.4	82	12.5		7.37313	4.29762	18.3237	0.357895	713.374
	NLSD2-1882		75.56	0.1	12.95		0.92	0.27	0.1	0.2	1.17	3.45	4.53	0.03	407	41.7	55.4	29.1	2.96	7.37	8.67	10.9		9.76019	3.94844	18.7162	0.293478	702.732
Dajishan W deposit	DJS-01	Muscovite albite-rich garnite	73.67	0.08	14.77		0.24	0.52	0.07	0.13	0.44	4.59	4.09	0.03	927.769	24.047	27.321	48.558	11.778	142.471	581.615	35.714		38.5815	0.340827	2.31966	2.16667	660.271	Hua et al., 2003
	DJS-05		69.88	0.08	16.66		0.25	0.56	0.17	0.04	0.53	4.28	6.28	0.03	1487.55	29.907	32.683	80.615	9.116	137.005	22.749	45.213		49.7392	0.588409	3.58523	2.24	666.009
	DJS-07		75.34	0.07	14.3		0.15	0.38	0.03	0	0.24	5.06	3.72	0.03	808.23	17.065	28.226	54.555	8.113	150.809	48.131	24.557		47.3619	0.361749	3.47911	2.53333	661.051
	DJS-10		74.35	0.09	14.63		0.5	0.38	0.17	0.15	0.42	4.67	3.22	0.03	801.82	36.58	31.111	69.54	9.912	139.415	183.427	53.065		21.9196	0.498799	3.13872	0.76	674.181
	DJS-2	Muscovite albite-rich garnite	75.6	0.01	13.62		0.13	0.29	0.06	0.16	0.74	4.27	4.17	0.02	510.8	49.7	18.2	22.5	4.38	6.84	13.9	14.6		10.2777	3.28947	4.15525	2.23077	629.135	Wu, 2017
	DJS-20		78.09	0.01	12.49		0.17	0.12	0.07	0.06	0.44	4.4	3.5	0.02	1003	23.6	30.7	56.8	5.72	103.5	9.97	22.1		42.5	0.548792	5.36713	0.705882	665.779
	DJS-7		73.62	0.02	14.8		0.17	0.15	0.05	0.09	0.59	4.42	5.2	0.02	992.6	26	17.5	41.8	3.01	46.5	313.7	17.1		38.1769	0.898925	5.81395	0.882353	624.431
	DJS-14	Muscovite K-feldspar granite	75.83	0.01	14.58		0.08	0.2	0.13	0.13	0.33	5.05	3.64	0.02	734	17.6	27.3	30.4	7.42	29.7	13.4	20.2		41.7045	1.02357	3.67925	2.5	659.836	Zuo, 2016
	DJS-13		77.21	0.01	14.09		0.11	0.44	0.03	0.15	0.42	4.22	3.25	0.01	647	12.7	21.7	19.8	6.93	17.1	672	26.5		50.9449	1.15789	3.13131		653.067
	DJS-12		76.87	0.01	13.83		0.18	0.24	0.11	0.14	0.66	4.11	3.8	0.02	705	32.8	25.5	15.2	7.41	7.36	729	15.8		21.4939	2.06522	3.4413	1.33333	657.51
	DJS-11		77.45	0.01	14.02		0.21	0.26	0.16	0.06	0.71	3.56	3.95	0.01	745	24.5	27.1	56.5	6.27	42	9.46	14.5		30.4082	1.34524	4.32217	1.2381	666.881
	DJS-8		76.38	0	13.76		0.13	0.29	0.06	0.13	0.75	4.25	4.21	0.02	510.81	39.54	18.2	22.46	5.48	6.84	45.2	17		12.9188	3.28363	3.32117	2.23077	629.829
	DJS-6		76.34	0.01	13.91		0.17	0.12	0.07	0.06	0.45	4.17	4.58	0.02	902.3	27.67	30.69	56.79	6.72	53.48	18.3	27.2		32.6093	1.06189	4.56696	0.705882	666.563
	DJS-5		75.31	0.01	13.99		0.42	0.59	0.24	0.08	0.32	4.66	4.43	0.02	735.57	25.12	24.89	2.38	7.67	8.55	12.3	18.6		29.2822	0.278363	3.24511	1.40476	649.341
	DJS-4		73.9	0.02	13.55		0.68	0.97	0.35	0.15	0.23	3.99	4.69	0.02	992.62	22.57	17.49	21.79	3.01	46.46	112	8.72		43.9796	0.469006	5.81063	1.42647	630.117
	DJS-3		74.42	0.01	14.18		0.78	0.96	0.55	0.18	0.32	4.47	4.29	0.02	831.79	25.29	26.86	41.9	4.36	31.53	34.2	30.3		32.8901	1.32889	6.16055	1.23077	657.539
	DJS-1		75.08	0.01	13.32		0.57	0.83	0.58	0.12	0.28	4.51	4.19	0.02	962.37	32.14	66.09	39.59	7.64	28.75	23.2	17.8		29.9431	1.37704	8.65052	1.45614	719.063
Triassic W deposit
Shuiyuanshan W deposit	WXL-10-5	Tourmaline-bearing two-mica granite	74.77	0.12	14.04	1.03	0.87	0.06	0.05	0.25	0.29	3.35	4.66	0.21	460.8	35.2	75	25.2	2.38	7.37	57.1	23	83.9151	13.0909	3.41927	31.5126	0.0689655	743	Zhang et al., 2016
	WXL-1		72.7	0.15	14.55	1.39	0.97	0.31	0.07	0.45	0.98	3.24	5.12	0.22	433.5	60.1	96.4	28.7	3.85	10.79	17	17.9	98.0049	7.21298	2.65987	25.039	0.319588	753
	WXL-24		73.58	0.09	14.33	0.99	0.4	0.55	0.07	0.34	1.08	2.81	4.95	0.26	543.1	27	47.4	17.5	2.01	5.96	62.9	23.3	75.6297	20.1148	2.93624	23.5821	1.375	703
	ZK12801-1		73.06	0.21	14.18	1.52	1.37	0	0.03	0.5	1.85	3.19	4.16	0.15	379.2	182.1	118.3	24.3	3.59	4.9	13.7	26.9	91.0315	2.08237	4.95918	32.9526	0	765
	11WXL-15		73.49	0.12	14.99	0.87	0.27	0.57	0.03	0.24	0.45	3.06	4.91	0.21	417	57.8	65.4	21	2.2	7.88	6.2	9.9	97.704	7.21453	2.66497	29.7273	2.11111	735
	11WXL-17		74.52	0.18	13.81	1.37	0.7	0.59	0.07	0.4	1.03	3.26	4.29	0.12	407	64.7	86.1	24	2.95	5.96	10.7	14.6	87.4641	6.29057	4.02685	29.1864	0.842857	747
	11WXL-19		72.12	0.18	14.44	1.51	0.79	0.64	0.06	0.43	0.99	3.52	4.3	0.16	351	68.3	82.6	22.2	2.74	6.52	4.9	14	101.655	5.13909	3.40491	30.146	0.810127	743
	11WXL-20		72.41	0.15	14.45	1.18	0.55	0.57	0.06	0.34	0.96	3.53	4.47	0.17	387	47.5	75.1	24	2.82	6.91	5.7	15.9	95.8436	8.14737	3.47323	26.6312	1.03636	735
	11WXL-25		72.7	0.18	15.3	1.59	0.54	0.99	0.05	0.51	0.45	2.51	4.47	0.16	394	65.2	84.3	22.7	2.9	6.03	43	19.7	94.1408	6.04294	3.76451	29.069	1.83333	766
	11MJL-19		72.87	0.1	14.35	0.97	0.47	0.45	0.08	0.28	0.92	3.21	4.04	0.28	450	43.1	42	26.7	1.65	7.77	26.7	36.3	74.4965	10.4408	3.43629	25.4545	0.957447	698
	07WXL36		73.26	0.07	15.41	0.76		0.76	0.1	0.14	0.52	4.5	3.38	0.16	595.1	24	26.3	58.9	2.69	54.66	4045	59.2	47.1296	24.7958	1.07757	9.77695		665
	07WXL41		73.15	0.08	15.19	0.82		0.82	0.12	0.05	0.41	4.42	3.77	0.16	672.9	19.1	33.5	40.8	3.07	28.16	3709	58	46.4898	35.2304	1.44886	10.9121		680
	WXL-41		74.12	0.02	14.84	0.79	0.71	0.00111111	0.13	0.16	0.37	5.01	3.45	0.16	557.4	18.8	19.1	79.4	2.85	89.48	4856	51.2	51.3593	29.6489	0.887349	6.70175	0.00156495	638
	WXL-1	Tourmaline-bearing biotite granite	71.51	0.17	14.62	1.43	0.84	0.496667	0.07	0.67	1.16	2.84	5.08	0.18	609	50.9	85.4	21.6	3.1	6.19			69.2171	11.9646	3.4895	27.5484	0.59127	746.223	Zheng and Guo, 2012
	WXL-2		74.2	0.11	14.31	1.05	0.56	0.427778	0.07	0.47	0.7	3.03	4.2	0.25	729	20.7	41.5	37.2	1.75	11.7			47.8067	35.2174	3.17949	23.7143	0.763889	700.985
	WXL-3		73.78	0.11	14.39	1.08	0.51	0.513333	0.08	0.43	0.72	2.93	4.5	0.24	803	14.3	46.3	41.4	1.93	14			46.5012	56.1538	2.95714	23.9896	1.00654	708.016
	WXL-4		73.8	0.11	14.57	0.98	0.51	0.413333	0.08	0.41	0.73	3.05	4.42	0.25	748	14.3	44.4	40.5	2.07	13			49.0329	52.3077	3.11538	21.4493	0.810458	704.74
	WXL-5		71.8	0.16	14.71	1.48	0.93	0.446667	0.07	0.84	0.96	2.56	5.5	0.2	656	41.8	83.5	25.2	3.07	6.44			69.5706	15.6938	3.91304	27.1987	0.480287	747.354
	WXL-6		78.14	0.08	12.37	0.92	0.33	0.553333	0.06	0.36	0.66	1.75	3.1	0.27	633	7.91	31.8	26.5	1.41	10.7			40.6373	80.0253	2.47664	22.5532	1.67677	698.902
	WXL-8		72.57	0.1	15.18	0.97	0.54	0.37	0.06	0.3	0.87	3.71	4.5	0.26	592	33.1	46.5	29	2	8.01			63.075	17.8852	3.62047	23.25	0.685185	700.641
	WXL-9		73.37	0.1	15.21	0.93	0.53	0.341111	0.06	0.26	0.86	3.64	4.38	0.24	650	24.9	40.9	39	1.76	10.4			55.9149	26.1044	3.75	23.2386	0.643606	693.472
	WXL-10		73.78	0.12	14.77	1.14	0.74	0.317778	0.06	0.38	0.76	3.44	4.13	0.18	628	31.9	53.3	40.5	2.3	8.68			54.5704	19.6865	4.6659	23.1739	0.429429	716.531
	W1	Tourmaline-bearing two-mica monzogranite	73.05	0.09	14.8	2.15222	1.28	0.73	0.13	0.46	1.1	2.34	3.82	0.43	569	16.9	60.4	27.5	2.1	12.6			55.708	33.6686	2.18254	28.7619	0.570312	736.373	Bai et al., 2006
	W2		70.99	0.09	15.06	2.69778	1.78	0.72	0.13	0.61	1.17	2.5	4.37	0.38	642	21.8	66.2	29.7	2.2	13.7			56.4824	29.4495	2.16788	30.0909	0.404494	736.516
	W3		72.18	0.13	14.7	2.35778	1.15	1.08	0.34	0.55	1	2.53	4.16	0.36	567	28.1	71.1	26.9	2.2	13.1			60.8803	20.1779	2.05344	32.3182	0.93913	744.855
	W4		72.76	0.12	14.18	2.64667	1.68	0.78	0.14	0.52	1.23	2.71	3.82	0.33	554	25.2	65.9	30.2	2.2	12.9			57.2164	21.9841	2.34109	29.9545	0.464286	734.303
	C14	Tourmaline-bearing biotite monzogranite	72.16	0.21	13.57	2.98556	2.57	0.13	0.07	0.58	1.12	3.08	4.44	0.18	339.4	97	92	22.4	2.9	4.1			108.552	3.49897	5.46341	31.7241	0.0505837	748.881
	C15		73.17	0.12	16.01	2.02889	1.52	0.34	0.11	0.35	0.37	0.6	4.5	0.32	848.6	13	45	45	2.1	14.7			44.0024	65.2769	3.06122	21.4286	0.223684	739.422
	HH21-4	Tourmaline-bearing two-mica monzogranite	70.88	0.1	18.26		0.42	1.14	0.12	0.22	0.41	0.19	5.56	0.06	731	4.87	59.7	23.1	2.66	12.8			63.1138	150.103	1.80469	22.4436	2.71429	763.066	Wang et al., 2012
	HH22-4		77.3	0.13	13.25		1.3	0.65	0.05	0.23	0.25	0.15	3.9	0.21	307	10.8	52.3	20	2.22	6.17			105.413	28.4259	3.24149	23.5586	0.5	757.342
	Hh0405	Biotite granite	72.43	0.21	14.38		2.23		0.09	0.54	1.01	3.32	4.61	0.18	330.2	64.16	92.36	22.67	3.17	6.24			115.849	5.14651	3.63301	29.1356		750.875
	HH6-2		72.22	0.22	13.6		2.45	0.18	0.09	0.62	1.06	4.03	3.96	0.17	292	23.4	65.2	28.7	2.73	4.26			112.533	12.4786	6.73709	23.8828	0.0734694	714.656
	HH24-3		72.33	0.14	14.86		2.15	0.19	0.07	0.44	0.88	3.46	4.01	0.19	293	24.4	48.4	24.7	2.34	6.8			113.565	12.0082	3.63235	20.6838	0.0883721	707.569
Tashan W deposit	D0231-1	Tourmaline-bearing biotite monzogranite	74.62	0.07	13.6	1.83	1.28	0.41	0.05	0.16	0.45	3.44	4.02	0.22	249.9	10	14	12.76	0.7	5.65	12.6	34.8	133.483	24.99	2.25841	20	0.320312	624.2	Du et al., 2015
	D0231-2		74.86	0.18	13.62	2.04	1.02	0.91	0.05	0.45	0.44	1.93	4.59	0.17	311.2	26	63	10.54	2	3.06	11.6	20.2	122.388	11.9692	3.44444	31.5	0.892157	743.186
	D0233		72.94	0.35	14.03	3.48	2.79	0.38	0.07	0.68	1.18	2.86	3.38	0.16	221.4	38	56	19.1	1.7	3.47	8.8	25.5	126.679	5.82632	5.50432	32.9412	0.136201	722.814
	D0241		72.71	0.18	14.31	2.26	1.99	0.05	0.05	0.35	0.61	2.65	5.84	0.2	309.1	40	64	10.71	2.1	3	18.5	20.3	156.776	7.7275	3.57	30.4762	0.0251256	725.294
	D0245		73.8	0.3	13.54	2.71	2.08	0.4	0.05	0.52	1.19	3.04	4.17	0.23	255.3	45	102	14.6	3.2	3.22	10.5	16.8	135.535	5.67333	4.53416	31.875	0.192308	759.904
	D0247		75.33	0.21	13.48	2.05	1.52	0.37	0.03	0.5	0.49	1.31	4.82	0.23	309.8	26	76	12.14	2.4	2.74	4.5	18.3	129.102	11.9154	4.43066	31.6667	0.243421	763.278
	D0251		72	0.26	14.4	3.11	2.44	0.41	0.05	0.53	0.75	3.07	4.96	0.18	258.3	57	92	13.27	2.7	2.38	6	13.3	159.34	4.53158	5.57563	34.0741	0.168033	753.749
	D0253		75.44	0.09	13.68	1.63	0.87	0.67	0.05	0.23	0.44	3	4.47	0.3	439.7	11	32	17.17	1.5	7.65	9.3	17.8	84.3564	39.9727	2.24444	21.3333	0.770115	681.208
	12D49	monzogranite	71.84	0.328	14		2.97	0.206	0.063	0.59	1.2	3.24	4.38	0.19	281	49.1	76.6	12.1	2.4	2.98			129.341	5.72301	4.0604	31.9167	0.0693603	733.293	Ma et al., 2016
	12D53		73.35	0.293	13.43		2.83	0.134	0.057	0.55	1.02	3.07	4.23	0.21	307	41.7	95.3	14.1	3.41	3.57			114.332	7.36211	3.94958	27.9472	0.0473498	754.676
	12D76		72.93	0.23	13.84		2.46	0.289	0.049	0.47	1.04	3.22	4.52	0.23	316	40.7	80.9	12	2.98	4.11			118.691	7.76413	2.91971	27.1477	0.11748	738.889
	12D77		72.07	0.316	13.94		2.98	0.26	0.063	0.55	1.14	3.28	4.43	0.21	271	45.8	89.4	12	2.34	3.44			135.644	5.91703	3.48837	38.2051	0.0872483	745.205
Yuntoujie W deposit	Y05-2	muscovite monzogranite porphyry	74.86	0.01	14.8			0.86	0.08	0.06	0.22	4.44	3.24	0.21	704	5.69	10.1	44.1	1.38	40.5			38.1891	124	1.09	7.29		606.479	Huang et al., 2016
	Y06-1		73.85	0.02	15.5			0.81	0.04	0.06	0.25	5.71	2.36	0.24	532	7.5	19.7	51.3	3.2	52.2			36.8101	71	0.98	6.16		643.518
	Y11	tourmaline muscovite monzogranite porphyry	74.59	0.16	13.47			1.56	0.05	0.26	0.77	3.2	4.6	0.12	403	19.2	73.5	13.2	3	3.81			94.7152	21	3.47	24.5		734.443
	Y20		72.49	0.14	14.83			1.68	0.04	0.31	0.76	3.31	4.68	0.18	496	17.9	69.3	19.4	2.29	4.34			78.2944	27.7	4.46	30.2		733.506
Liguifu W deposit	05DW2-1	biotite monzogranite	76.03	0.11	12.06		1.87	0.2	0.06	0.13	0.43	3.05	4.96	0.04	584	18.3	90.7	22.2	4.22	4.7	12.8	26.4	70.4751	31.9126	4.7234	21.4929	0.106952	747.133	Xu et al., 2017
	05DW2-2		76.32	0.0001	12.94		1.4	0.002	0.14	0.04	0.1	3.42	4.58	0.01	1203	8.2	21.9	12.4	2.69	32.5	25.8	21.6	31.5912	146.707	0.381538	8.14126	0.00142857	651.29
	05DW3-1		75.09	0.14	12.45		2.13	0.001	0.005	0.16	0.84	3.06	4.91	0.04	508	29.7	118	17.4	5.13	3.7	10.5	17.6	80.2019	17.1044	4.7027	23.0019	0.000469484	764.859
	05DW4-1		75.21	0.16	12.6		1.85	0.23	0.05	0.18	0.96	3	4.94	0.04	501	34	125	14.5	5.01	3	8.1	17.9	81.8193	14.7353	4.83333	24.9501	0.124324	769.476
	05DW5-1		75.25	0.11	12.38		2.01	0.19	0.05	0.11	0.6	3.12	5.19	0.03	588	20	89.7	18.7	4.22	4.9	19.9	13.7	73.2414	29.4	3.81633	21.2559	0.0945274	742.197
Although Shizhuyuan and Baiganhu deposit contain significant both Sn and W resource, they are not distinguished by simbols with that of Sn-granites in Figure 2.
Fe2O3T represents the total Fe content is expressed as Fe2O3
References
Bai, D.Y., Chen, J.C., Ma, T.Q., Wang, and X,H., 2005, Geochemical Characteristics and Tectonic Setting of Qitianling A-type Granitic Pluton in Southeast Hunan: Acta Petrologica et Mineralogica, v. 24, p.255-272 (in Chinese with English abstract)
Bai, D.Y., Lu, J.C., Ma, T.Q., and Wang, X.H., 2006, Geochemical characteristics of Wangxianling granitic pluton and its constraints on Late Indosinian tectonic setting of Southeast Hunan: Geochimica, v. 35, p. 113-125 (in Chinese with English abstract)
Cai, M.H., Chen, K.X., Qu, W.J., Liu, G.Q., Fu, J.M., and Yin, J.P., 2006, Geological characteristicsand Re-Os dating of molybdenites in Hehuaping tin-polymetallic deposit, southern Hunan Province: Mineral Deposits, v. 25, p. 263–268 (in Chinese with English abstract).
Chen, B., Ma, X.H., and Wang, Z.Q., 2014, Origin of the fluorine-rich highly differentiated granites from the Qianlishan composite plutons (South China) and implications for polymetallic mineralization: Journal of Asian Earth Sciences, v. 93, p. 301-314.
Chen, D., Chen, YM., Ma, AJ., Liu, W., Liu, YR., and Ni, Y.J., 2014, Magma mixing in the Xitian pluton of Hunan Province: Evidence from petrography, geochemistry and zircon U-Pb age: Geology in China, v. 41, p. 61-78 (in Chinese with English abstract).
Chen, D., Shao, Y.J., Liu, W., Ma A.J., and Liu YR.. 2013, Petrological and geochemical characteristics of Xitian pluton in Hunan province: Geology and Mineral Resources of South China, v. 31, p.11-25 (in Chinese with English abstract)
Chen, Y.X., Li, H., Sun, W.D., Ireland, T., Tian, XF., Hu, Y.B., Yang, W.B., Chen, C., and Xu, D.R., 2016, Generation of Late Mesozoic Qianlishan A2-type granite in Nanling Range, South China: Implications for Shizhuyuan W-Sn mineralization and tectonic evolution: Lithos, v. 266-267, p. 435-452.
Deng, X.G., Li, X.H., Liu, Y.M., Huang, G.F., and Hou, M.S., 2005, Geochemical characteristics of Qitianling granites and their implications for mineralization: Acta Petrologica et Mineralogica, v. 24, p. 93-102 (in Chinese with English abstract)
Du, Y., Shao, Y.J., Luo, X.Y., Guo, A.M., Huang, G.F., Tian, L., Wang, J.Y., and Chen, B.H., 2015, Geological Features and Genesis of Tianmuchong pollymetallic tungsten-tin Deposit in Guiyang County, Hunan Province: Geology and Mineral Resources of South China, v. 31, p. 354-367 (in Chinese with English abstract).
Fu, J.M., Xie, C.F., Peng, S.B., Yang, X.J., and Mei, Y.P., 2006, Geochemistry and Crust-Mantle Magmatic Mixing of the Qitianling Granites and Their Dark Microgranular Enclaves in Hunan Province: Acta Geoscientica Sinica, v. 27, p. 557-569 (in Chinese with English abstract).
Guo, C.L., Wang, R.C., Yuan, S.D., Wu, S.H., and Yin, B., 2015, Geochronological and geochemical constraints on the petrogenesis and geodynamic setting of the Qianlishan granitic pluton, Southeast China: Mineralogy and Petrology, v. 109, p. 253-282.
Huang, W.T., Wu, J., Zhang, J., Liang, H.Y., and Qiu, X.L., 2016, Geochemistry and Hf–Nd isotope characteristics and forming processes of the Yuntoujie granites associated withW–Mo deposit, Guangxi, South China: Ore Geology Reviews, v. 81, p. 953-964.
Jiang, Y.H., Jiang, S.Y., Zhao, K.D., and Ling, H.F., 2006, Petrogenesis of Late Jurassic Qianlishan granites and mafic dykes, Southeast China: implications for a back–arc extension setting: Geological Magazine, v. 143, p.457–474.
Lai, S.H., 2014, Research on mineralization of the Xianghualing tin polymetallic deposit, Hunan Province, China: A dissertation submitted to China University of Geosciences for doctoral degree (in Chinese with English abstract).
Li, X.M., Hu, R.Z., Bi, X.W., and Peng, J.T., 2010, Geochemistry and tin metallogenic potential for Qitianling granite mass in southern Hunan: Journal of jilin University, v. 40, p. 81-108 (in Chinese with English abstract).
Liu, G.Q., Wu, S.H., Du, A.D., Fu, J.M., Yang, X.J., Tang, Z.H., and Wei, J.Q., 2008, Metallogenic ages of the Xitian tungsten-tin deposit, eastern Hunan province: Geotectonica et Metallogenia, v. 32, p. 63-71 (in Chinese with English abstract).
Ma, L.Y., Liu, S.S., Fu, J.M., Cheng, S.B., Lu, Y.Y., and Mei, Y.P., 2015, Petrogenesis of the Tashan-Yangmingshan granitic batholiths: Constraints from zircon U-Pb age, geochemistry and Sr-Nd isotopes: Acta Geologica Sinica, v. 90, p. 284-303 (in Chinese with English abstract).
Mao, J.W., and Li, H.Y., 1995, Evolution of the Qianlishan granite stock and its relation to the Shizhuyuan polymetallic tungsten deposit: International Geology Review, v. 37, p. 63-80.
Qiu, R.Z., Deng, J.F., Cai, Z.Y., Zhou, S., Chang, H.L., and Du, S.H., 2003, Nd isotopic characteristics and genesis of Xianghualing 430 granitic body, Hunan Province: Acta Petrologica et Mineralogica, v.22, p. 41-46 (in Chinese with English abstract).
Su, H.Z., 2017, The petrogenesis studies of the Mesozoic Xiangyuan tungsten-tin deposit and related granites in Hunan Province: A Dissertation submitted to China University of Geosciences for master degree (in Chinese with English abstract).
Wang, X.B., Cai, M.H., Peng, Z.A., Xu, M., Liu, H., and Guo, T.F., 2012, Geochemical characteristics and mineralization of Wangxianling granite in Hehuaping area, southern Hunan Province : Geology and Mineral Resources of South China, v. 28, p. 115-123 (in Chinese with English abstract).
Wang, X.B., Wu, J., Cai, M.H., Chen, W.H., Xie, D.F., and Liu, X., 2013, Geochemical characteristics and Sr-Nd-Hf isotopic composition of Yanshanian granite porphyries in the Hehuaping area of southern Hunan and their geological significance: Geology and Exploration, v. 49, p. 300-312 ( in Chinese with English abstract)
Wen, C.H., Shao, Y.J., Huang, G.F., Luo, X.Y., and Li, S.M., 2017, Geochemical features and mineralization of Jianfengling rare metal granite in Hunan Province: Mineral Deposits, v. 36, p. 879-892 (in Chinese with English abstract)
Xu, D.M., Fu, J.M., Chen, X.Q., Cheng, S.B., Ma, L.Y., Zhang, K., and Huang, H., 2017, Formation Age and Petrogenesis of the Dupangling Rapakivi Granites and its Geological Significance: Geotectonica et Metallogenia, v. 41, p. 561-576 (in Chinese with English abstract)
Xuan, Y.S., Yuan, S.D., Yuan, Y.B., and Mi, J.R., 2014, Zircon U-Pb age, geochemistry and petrologenesis of Jianfengling pluton in southern Hunan Province: Mineral Deposits, v.33, p. 1379-1390 (in Chinese with English abstract).
Yao, Y., Chen, J., Lu, J.J., and Zhang, R.Q., 2013, Geochronology, Hf isotopic compositions and geochemical characteristics of Xitian A-type granite and its geological significance: Mineral Deposits, v. 32, p. 467-488 ( in Chinese with English abstract).
Yuan, S.D., 2007, Geochronology and geochemistry of the Xianghualing tin-polymetallic deposit, Hunan Province, China: A dissertation submitted for the degree of doctor of philosophy of the Chinese Academy of Sciences and for diploma of Institute of Geochemistry (in Chinese with English abstract).
Zhang, R.Q., Lu, J.J., Wang, R.C., Yao, Y., Ding, T., Hu, J.B., and Zhang, H.F., 2016, Petrogenesis of W- and Sn-bearing granites and the mechanism of their metallogenic diversity in the Wangxianling area, southern Hunan Province: Geochemica, v. 45, p. 105-132 (in Chinese with English abstract)
Zhao, K.D., Jiang, S.Y., Yang, S.Y., Dai, B.Z., and Lu, J.J., 2012, Mineral chemistry, trace elements and Sr-Nd-Hf isotope geochemistry and petrogenesis of Cailing and Furong granites and mafic enclaves from the Qitianling batholith in the Shi-Hang zone, South China: Gondwana Research, v. 22, p. 310-324.
Zheng, J.H., and Guo, C.L., 2012, Geochronology, geochemistry and zircon Hf isotopes of the Wangxianling granitic intrusion in South Hunan Province and its geological significance: Acta Petrol. Sin, v.28, p.75–90 (in Chinese with English abstract).
Zhou, Y., Liang, X.Q., Liang, X.R., Wu, S.C,. Jiang, Y., Wen, S.N., and Cai, Y.F., 2013, Geochronology and Geochemical Characteristics of the Xitian Tungsten-Tin-Bearing A-type Granites, Hunan Province, China: Geotectonica et Metallogenia, v. 37, p. 511-529 (in Chinese with English abstract).

## Sheet: 1B Jiangnan W belt
Table S1B Geochemical data of the W-related granite in the Jiangnan W belt, South China
Deposit	Sample Number	Rock type	SiO2	TiO2	Al2O3	Fe2O3T	FeOT	Fe2O3	FeO	MnO	MgO	CaO	Na2O	K2O	P2O5	Rb	Sr	Nb	Ta	Zr	Hf	W	Sn	Rb/Sr	Nb/Ta	Zr/Hf	Fe2O3/FeO	TZr(°C)	References
Zhuxi W deposit	zk2808-1090.1	granite porphyry	72.64	0.07	13.64	1.09	0.98			0.05	0.16	1.03	0.2	7.99	0.27	662	33	19.4	9.82	21	1.69			20.0606	1.97556	12.426		651	Li et al., 2014
	zk2808-1091.1		73.9	0.06	13.64	0.97	0.87			0.05	0.17	1.04	0.17	7.3	0.28	641	28.5	17.9	9.17	20.1	1.55			22.4912	1.95202	12.9677		653
	zk4207-902		76.06	0.06	13.48	1.1	0.99			0.05	0.51	0.5	0.08	4.07	0.27	399	7.83	19.3	8.6	20.8	1.62			50.9579	2.24419	12.8395		684
	ZK5406-1	fine-grained granite	72.59	0.22	14.71		1.86	0.27	1.62	0.1	0.4	1.48	3.75	4.73	0.13	251	115	14.1	2.56	79.3	2.73	2.28	4.25	2.18261	5.50781	29.0476	0.166667	728	Wang et al., 2015
	ZK5406-2		72.05	0.24	14.95		1.83	0.08	1.76	0.08	0.42	1.59	3.84	4.84	0.14	262	133	11.4	2.37	96.4	3.34	3.12	3.7	1.96992	4.81013	28.8623	0.0454545	741
	ZK5406-3		72.78	0.23	14.69		1.98	0.12	1.87	0.1	0.39	1.5	3.6	4.56	0.16	306	125	13.1	2.19	80.1	2.79	3.24	7.74	2.448	5.98174	28.7097	0.0641711	732
	ZK5406-4		73.01	0.23	14.56		1.9	0.08	1.83	0.09	0.38	1.51	3.41	4.72	0.16	287	121	12.7	2.35	66.1	2.38	18.4	7.79	2.3719	5.40426	27.7731	0.0437158	717
	ZK5406-5		73.21	0.23	14.52		1.85	0.1	1.76	0.09	0.43	1.96	3.14	4.39	0.17	239	126	12.2	2.7	67.9	2.49	16.7	7.53	1.89683	4.51852	27.2691	0.0568182	720
	Z-10	muscovite granite	72.75	0.06	12.82		0.12	0.02	0.1	0.01	0.15	4.25	2.14	2.47	0.09	221	137	12.3	6.76	28.2	1.38	98.7	8.73	1.61314	1.81953	20.4348	0.2	649	Liu et al., 2017
	Z-11		72.47	0.06	13.13		0.11	0.02	0.09	0.01	0.17	3.87	2.24	2.63	0.08	236	113	14.4	7.22	35.5	1.57	50.3	7.99	2.0885	1.99446	22.6115	0.222222	668
	Z-12		73.08	0.05	13.43		0.12	0.04	0.08	0.01	0.2	3.43	2.78	2.68	0.09	278	131	12.6	5.99	31.1	1.43	63.8	7.65	2.12214	2.10351	21.7483	0.5	659
	Z-13		75.13	0.04	10.3		1.06	0.07	1	0.11	0.11	6.61	1.03	0.75	0.07	118	120	8.38	4.45	24.6	1.19	442	79	0.983333	1.88315	20.6723	0.07	621
	Z-14		72.22	0.05	11.39		1.54	0.05	1.5	0.03	0.12	5.61	0.56	2.35	0.06	323	204	11.6	5.34	22.1	1.07	166	14.2	1.58333	2.17228	20.6542	0.0333333	626
	Z-15		73.02	0.06	12		1.69	0.05	1.65	0.02	0.28	4.76	1.2	1.86	0.07	249	192	16.4	7.47	28.1	1.24	248	13.1	1.29688	2.19545	22.6613	0.030303	652
	Z-16		76.55	0.03	10.89		1.21	0.08	1.14	0.02	0.08	5.47	1.37	0.95	0.08	130	157	11	4.78	25.1	1.13	512	16.9	0.828025	2.30126	22.2124	0.0701754	636
	Z-17		74.58	0.06	12.58		0.84	0.05	0.8	0.02	0.08	5.92	1.53	0.88	0.05	131	197	12.1	5.26	27.8	1.27	530	21	0.664975	2.30038	21.8898	0.0625	646
	Z-18		74.53	0.1	13.66		1.53	0.08	1.46	0.03	0.28	1.99	1.28	4.82	0.13	321	149	8.58	2.27	43.1	1.63	71.6	12.1	2.15436	3.77974	26.4417	0.0547945	701
	Z-19		73.54	0.1	14.34		1.21	0.05	1.17	0.03	0.27	2.51	0.41	4.16	0.15	368	122	8.11	2.55	46.9	1.66	20.5	18.6	3.01639	3.18039	28.253	0.042735	719
	Z-20		71.21	0.11	14.59		1.01	0.07	0.95	0.02	0.25	3.65	2.62	3.13	0.15	205	130	6.96	2.24	46.2	1.67	82.5	9.19	1.57692	3.10714	27.6647	0.0736842	687
	Z-21		73.24	0.11	13.92		0.91	0.05	0.87	0.02	0.21	3.9	3.9	1.64	0.16	156	232	7.56	2.32	44.8	1.68	415	21.9	0.672414	3.25862	26.6667	0.0574713	676
	Z-22		74.17	0.11	13.3		1.33	0.09	1.25	0.02	0.21	4.69	2.92	0.98	0.18	118	260	6.33	2.2	44.5	1.71	338	30.1	0.453846	2.87727	26.0234	0.072	679
	Z-23		75.73	0.05	12.91		1.19	0.05	1.15	0.02	0.07	4.02	3.42	0.55	0.12	77.2	57.4	6.38	2.61	28.6	1.27	410	9.16	1.34495	2.44444	22.5197	0.0434783	653
	Z-01	two-mica granite	71.12	0.27	15.23		1.78	0.01	1.77	0.07	0.52	1.69	3.71	4.31	0.15	290	134	16.4	3.57	100	3.01	0.84	7.42	2.16418	4.59384	33.2226	0.00564972	750
	Z-02		72.26	0.21	14.62		1.47	0.23	1.26	0.05	0.45	1.38	3.46	4.67	0.17	308	116	13.6	3.26	77.2	2.47	2.33	9.55	2.65517	4.17178	31.2551	0.18254	731
	Z-03		74.15	0.21	13.95		1.64	1.03	0.71	0.03	0.43	0.62	0.01	4.64	0.16	462	31.4	14.2	2.63	73.9	2.39	44.1	10.6	14.7134	5.39924	30.9205		779
	Z-06		72.98	0.22	14.18		1.94	0.45	1.54	0.05	0.38	1.53	2.13	4.98	0.1	321	99.8	12.4	2.23	66.7	2.35	15.2	7.67	3.21643	5.56054	28.383	0.292208	730
	Z-07		73.09	0.2	14.02		1.96	0.57	1.45	0.04	0.38	1.26	0.77	5	0.11	311	66.7	10.7	1.94	79.9	2.5	16.9	11.4	4.66267	5.51546	31.96	0.393103	764
	Z-08		70.15	0.22	15.1		1.97	0.43	1.58	0.07	0.39	1.62	1.17	5.58	0.16	327	80.3	15.4	2.86	77.1	2.49	69.5	23.4	4.07223	5.38462	30.9639	0.272152	750
	Z-09		72.15	0.25	14.08		2.49	0.35	2.18	0.07	0.4	1.44	2.85	4.36	0.15	320	102	14.5	2.55	78.5	2.56	16.4	10.5	3.13725	5.68627	30.6641	0.16055	739
	Z-24	muscovite granite porphyry	74.36	0.05	13.75		3.37	0.27	3.13	0.03	1.06	0.8	0.15	4.49	0.2	376	11.2	8.91	5.44	26.5	1.58	66.9	14.2	33.5714	1.63787	16.7722	0.086262	694
	Z-25		76.75	0.05	12.89		1.54	0.2	1.36	0.02	0.97	0.77	0.11	4.45	0.16	353	9.74	9.5	6.8	24.2	1.6	43.8	10.9	36.2423	1.39706	15.125	0.147059	687
	Z-26		74.99	0.05	14.39		2.24	0.35	1.93	0.02	0.59	0.8	0.1	4.98	0.21	399	9.89	13.6	7.47	27	1.73	90.8	13.3	40.3438	1.82062	15.6069	0.181347	694
	Z-27		75.02	0.05	13.19		0.3	0.02	0.28	0.03	0.39	2.36	0.17	3.85	0.2	481	48	8.57	10.7	23.8	1.51	7.17	14.4	10.0208	0.800935	15.7616	0.0714286	673
	ZX08	granite porphyry	75.8	0.05	13.74			0.16	0.45	0.02	0.6	0.89	0.01	4.38	0.27	605	20.9	19.8	8.85	23.5	1.77			28.9474	2.23729	13.2768	0.355556	688	Song et al., 2018
	ZXB34-1		76.07	0.05	12.68			0.17	0.48	0.04	0.22	1.96	0.01	3.92	0.25	508	34.9	18.3	9.31	23.1	1.88			14.5559	1.96563	12.2872	0.354167	675
	ZX14	fine-grained granite	73.85	0.1	12.92			0.14	0.05	0.02	0.24	2.66	2.98	2.48	0.14	225	152	6.2	1.98	43.3	1.84			1.48026	3.13131	23.5326		688
	ZX15-3		71.77	0.11	14.31			0.18	0.09	0.03	0.26	3.33	0.01	4.99	0.15	333	167	10.8	2.71	44.3	1.97			1.99401	3.98524	22.4873		703
	ZX15-4		74.23	0.1	14.69			0.14	0.09	0.02	0.25	1.32	0.01	5.53	0.13	440	102	10.7	2.5	43.4	1.92			4.31373	4.28	22.6042		723
	zxa23	biotite monzogranite	71.97	0.34	14.49			0.33	1.63	0.05	0.62	1.22	3.16	4.64	0.15	287	117	13.1	1.87	125	3.78			2.45299	7.00535	33.0688	0.202454	775
	zxa31-4		70.87	0.38	14.79			0.45	1.81	0.07	0.69	1.85	3.02	4.46	0.2	266	157	13.9	1.51	123	3.76			1.69427	9.2053	32.7128	0.248619	769
	zxa33		71.14	0.34	14.46			0.39	1.71	0.07	0.56	1.56	2.94	4.72	0.18	302	147	13.4	2.03	116	3.39			2.05442	6.60099	34.2183	0.22807	766
	1227	granite	77.68	0.05	14.13		0.21			0.03	0.58	0.89	0.56	4.23	0.27	505	6.44	20.17	12.83	34.52	2.05		17.22	78.4161	1.5721	16.839		712	Chen et al., 2015
	1227-1		77.93	0.06	13.56		0.26			0.03	0.63	0.93	0.61	4.41	0.26	551	7.49	21.34	12.48	31.33	2.18		17.66	73.5648	1.70994	14.3716		701
	1227-2		77.69	0.05	13.62		0.24			0.04	0.62	1.02	0.63	4.34	0.28	523	6.55	20.41	12.56	29.67	1.92		16.53	79.8473	1.625	15.4531		697
	1227-3		78.34	0.08	12.96		0.28			0.03	0.71	0.98	0.56	4.82	0.25	509	6.86	20.56	12.13	30.38	2.1		16.63	74.1983	1.69497	14.4667		694
	1228		78.28	0.05	13.95		0.09			0.02	0.52	0.97	0.58	4.31	0.25	513	8.12	20.86	12.69	32.36	1.98		16.78	63.1773	1.64381	16.3434		705
	1228-1		78.09	0.05	13.83		0.08			0.02	0.51	0.96	0.58	4.32	0.25	523	7.67	20.96	11.96	31.73	2.01		16.94	68.1877	1.75251	15.7861		704
	1228-2		77.76	0.06	13.84		0.08			0.02	0.5	0.96	0.57	4.27	0.25	531	6.39	21.13	12.53	32.21	2.13		16.98	83.0986	1.68635	15.1221		705
	1228-3		78.61	0.06	13.71		0.21			0.02	0.48	1.01	0.62	4.91	0.26	538	6.65	21.63	13.13	33.1	2.05		17.11	80.9023	1.64737	16.1463		701
	1228-4		77.85	0.07	13.86		0.25			0.03	0.63	0.97	0.65	4.89	0.28	542	7.13	21.18	13.35	30.76	1.96		17.18	76.0168	1.58652	15.6939		696
	1229	granite porphyry	77.76	0.07	13.47		0.16			0.04	0.81	0.86	0.62	4.76	0.24	513	7.24	20.56	12.96	31.06	2.21		17.31	70.8564	1.58642	14.0543		698
	1229-1		77.28	0.08	13.84		0.13			0.05	0.53	0.92	0.83	5.03	0.3	509	7.53	20.91	12.85	30.88	2.15		16.95	67.5963	1.62724	14.3628		694
	1229-2		77.82	0.08	13.68		0.19			0.05	0.49	0.96	0.58	5.12	0.28	511	6.39	20.68	12.79	29.78	2.23		16.88	79.9687	1.61689	13.3543		693
	1229-3		76.93	0.06	14.08		0.2			0.04	0.73	0.89	0.56	5.26	0.28	522	6.68	20.73	13.46	32.25	2.31		17.03	78.1437	1.54012	13.961		700
Dahutang W deposit	13DHT-5	Porphyritic biotite granite	72.81	0.18	14.68		1.18	0.33	0.88	0.03	0.34	0.95	3.75	4.74	0.16	405	73	9.1	2.04	90.2	2.84	18.5	23.5	5.54795	4.46078	31.7606	0.375	746	Mao et al., 2015
	13DHT-7		72.76	0.22	15.02		1.33	0.25	1.11	0.04	0.38	1.17	3.86	4.72	0.17	383	66	9.85	2.1	91.6	2.89	4.6	17.2	5.80303	4.69048	31.6955	0.225225	744
	13DHT-21		73.18	0.21	14.42		1.25	0.23	1.04	0.03	0.36	1.04	3.7	4.6	0.16	354	66.5	9.1	1.88	93	2.91	19.5	15	5.32331	4.84043	31.9588	0.221154	747
	13DHT-22		71.62	0.21	15.6		1.35	0.25	1.13	0.04	0.4	1.25	3.99	4.89	0.16	356	60.5	9.43	1.94	100	3.06	3.37	20.2	5.8843	4.86082	32.6797	0.221239	750
	13DHT-23		73.43	0.2	14.71		1.26	0.3	0.99	0.03	0.39	1.08	3.68	4.79	0.14	331	67.7	8.12	1.98	100	3.06	2	7.84	4.88922	4.10101	32.6797	0.30303	753
	13DHT-24		72.16	0.28	14.91		1.74	0.16	1.6	0.04	0.55	1.1	3.72	4.76	0.16	354	67.7	10.8	2	105	3.18	16.6	11.1	5.22895	5.4	33.0189	0.1	756
	13DLS-7		73.05	0.22	14.83		1.33	1.1	0.34	0.04	0.31	0.95	2.97	5.5	0.17	381	53.9	9.06	2.23	90.7	2.96	31.6	43.6	7.06865	4.06278	30.6419		750
	13DLS-8		72.93	0.21	14.39		1.24	0.92	0.41	0.04	0.31	0.94	2.8	5.47	0.18	404	52	8.85	2.16	99.6	3.1	68.7	42	7.76923	4.09722	32.129	2.2439	758
	13DLS-9		74.38	0.21	13.67		1.44	0.98	0.56	0.04	0.33	1.05	2.58	4.31	0.16	402	59.7	11.9	0.61	92.5	1.46	3373	78.4	6.73367		63.3562	1.75	761
	13DHT-4	Fine-grained granite	72.51	0.24	14.66		1.37	0.35	1.06	0.03	0.5	1.21	3.67	4.82	0.13	286	77.9	9.45	2.64	104	3.16	2.5	3.53	3.67137	3.57955	32.9114	0.330189	753
	13DHT-8		72.61	0.22	14.52		1.39	0.24	1.17	0.03	0.48	1.07	3.47	4.77	0.13	326	64.6	8.45	1.87	104	3.31	18.2	13.1	5.04644	4.51872	31.4199	0.205128	758
	13DHT-9		72.52	0.24	14.28		1.45	0.41	1.08	0.03	0.49	1.23	3.1	4.99	0.16	329	87.2	8.73	1.96	100	3.04	16.4	30.4	3.77294	4.45408	32.8947	0.37963	754
	13DHT-12		73.15	0.23	14.73		1.38	0.26	1.15	0.03	0.51	1.1	3.56	4.84	0.14	343	89.1	8.28	1.65	110	3.28	11.1	7.84	3.84961	5.01818	33.5366	0.226087	761
	13DHT-14		73.46	0.2	14.56		1.28	0.32	0.99	0.04	0.41	1.04	3.61	4.57	0.16	378	67	9.53	2.14	84.5	2.55	5.44	18	5.64179	4.45327	33.1373	0.323232	742
	13DHT-19		72.35	0.23	14.87		1.41	0.35	1.1	0.03	0.49	1.23	3.49	4.85	0.14	307	74.1	8.02	1.71	103	3.22	12.8	17.1	4.14305	4.69006	31.9876	0.318182	756
	13DHT-20		72.61	0.24	14.96		1.41	0.33	1.11	0.03	0.49	1.22	3.44	4.84	0.13	333	75.5	8.23	1.65	104	3.05	13.9	17.8	4.4106	4.98788	34.0984	0.297297	758
	13DLS-4		74.49	0.11	13.81		0.93	0.18	0.77	0.03	0.18	0.73	2.98	5.17	0.16	406	36.1	11.8	7	45.5	1.69	7.38	31.3	11.2465	1.68571	26.9231	0.233766	699
	13DLS-13		74.49	0.18	13.57		1.47	0.7	0.84	0.03	0.27	0.87	2.79	5.27	0.16	452	44.8	14.3	2.75	119	3.84	88.5	38.9	10.0893	5.2	30.9896	0.833333	772
	13DLS-14		73.87	0.13	14.45		0.98	0.16	0.84	0.03	0.25	0.73	3.32	5.35	0.19	437	40.1	14.2	6.57	48.4	1.84	227	39.6	10.8978	2.16134	26.3043	0.190476	700
	13DHT-1	granite porphyry	73.8	0.1	14.76		0.97	0.26	0.74	0.04	0.18	0.7	3.85	4.52	0.23	492	18.1	14.3	3.38	55.2	2.07	19.8	40.6	27.1823	4.23077	26.6667	0.351351	712
	13DHT-2		74.54	0.11	14.41		0.97	0.25	0.75	0.04	0.18	0.66	3.78	4.28	0.22	584	37.1	14.3	3.32	58.9	2.31	18.5	45.8	15.7412	4.30723	25.4978	0.333333	719
	13DHT-11		73.74	0.13	14.32		0.97	0.22	0.77	0.03	0.21	0.69	3.46	4.62	0.2	523	22.5	11.6	2.7	51	1.97	13	75.4	23.2444	4.2963	25.8883	0.285714	708
	13DHT-13		74.31	0.12	14.78		0.97	0.4	0.61	0.04	0.19	0.67	3.87	4.41	0.24	495	20.6	14.8	3.55	46.9	1.86	11.3	42	24.0291	4.16901	25.2151	0.655738	701
	13SWD-1		74.45	0.11	14.29		1.05	0.03	1.02	0.04	0.18	0.68	3.52	4.65	0.27	432	30.9	14.3	3.39	58.9	2.27	7.73	31.3	13.9806	4.21829	25.9471	0.0294118	718
	13SWD-2		74.12	0.15	13.88		1.13	0.36	0.81	0.03	0.28	0.62	3.07	4.77	0.22	381	41.5	12.2	2.62	64	2.25	7.99	138	9.18072	4.65649	28.4444	0.444444	728
	13DLS-2		75.33	0.15	13.74		1.28	0.3	1.01	0.03	0.26	0.78	3.43	4.26	0.23	422	26.8	14.1	3.11	87.7	3.12	23.2	56.8	15.7463	4.53376	28.109	0.29703	750
	13DLS-10		74.34	0.09	14.11		0.99	0.05	0.95	0.05	0.21	0.5	3.72	3.94	0.37	748	9.29	23.1	9.15	45.3	1.97	562	80.8	80.5167	2.52459	22.9949	0.0526316	703
	81#-12	porphyritic two-mica granite	74	0.15	13.91	1.25		0.272222	0.88	0.04	0.33	0.74	2.91	4.97	0.23	804	40.3	14.6	3.59	87.8	3.19	58.1	78.2	19.9504	4.06685	27.5235	0.309343	752	Huang and Jiang, 2014
	ZK0-26-1		72.52	0.17	14.21	1.36		0.137778	1.1	0.04	0.32	0.75	3.7	4.39	0.29	616	24.9	18.5	5.58	91.1	3.44	33.1	81.6	24.739	3.31541	26.4826	0.125253	750
	ZK0-26-2		72.88	0.18	14.27	1.47		0.225556	1.12	0.04	0.3	0.59	3.69	4.27	0.29	571	21.7	19.6	6.11	98.3	3.84	27.9	52.7	26.3134	3.20786	25.599	0.201389	760
	ZK0-26-3		73.33	0.16	14.02	1.5		0.277778	1.1	0.04	0.31	0.73	2.92	4.77	0.25	707	36.7	16.6	4.53	88.5	3.25	102	65.8	19.2643	3.66446	27.2308	0.252525	754
	DHT-60	Dahutang	73.73	0.12	14.36	1.12	1.01			0.05	0.23	0.73	2.45	5.03	0.18	597	53	15.9	3.47					11.2642	4.58213			715	Xiang et al., 2015
	DHT-61		74.57	0.12	13.98	0.96	0.86			0.03	0.23	0.74	2.03	5.18	0.17	604	54.6	11.2	2.18					11.0623	5.13761			721
	DHT-67		73.41	0.11	14.69	1.08	0.97			0.05	0.23	0.69	3.74	4.23	0.24	488	30.1	16.8	3.69					16.2126	4.55285			701
	16SMD1-H1	Coarse-grained porphyritic biotite granite	72.7	0.2	14.8	1.49	1.34			0.04	0.5	0.8	3.6	4.6	0.13	343	79.9	8.7	2	104	3.34	28.1				31.1377		763	Fan et al., 2019
	16SMD1-H2		72.8	0.19	14.3	1.32	1.19			0.04	0.49	1.2	3.4	4.8	0.13	370	84.2	9.5	2.2	101	3.41	31				29.6188		753
	16SMD1-H3		72.3	0.2	14.6	1.25	1.12			0.04	0.47	1.3	3.3	4.9	0.13	470	71.6	8.2	1.9	99.5	3.2	37.1				31.0938		753
	16SMD1-H4		73	0.2	14	1.36	1.22			0.04	0.49	1.2	3.5	4.7	0.13	367	82.2	9.4	1.9	98.7	3.2	19.3				30.8438		750
	16SMD1-H5		72.5	0.21	14.7	1.42	1.28			0.03	0.62	0.9	3.4	4.8	0.13	342	84	9.6	1.9	126	4.1	8.09				30.7317		778
	16SMD1-H6		73	0.21	14.4	1.37	1.23			0.03	0.58	1.1	3.7	4.5	0.14	325	104	10.5	2	115	3.69	1.55				31.1653		765
	16K13-H2		72.8	0.2	14.6	1.48	1.33			0.05	0.5	1.1	3.7	4.5	0.16	389	73.8	12.4	2.6	103	3.6	14				28.6111		756
	16K13-H4		73.6	0.19	14.3	1.36	1.22			0.04	0.46	1	3.5	4.3	0.16	351	59.8	10.4	2.4	103	3.42	5.72				30.117		761
	16K13-H6		73.4	0.19	14.3	1.33	1.2			0.04	0.42	1	3.4	4.6	0.18	381	67.6	11.4	2.3	98.2	3.31	3.39				29.6677		756
	16K13-H7		72.7	0.2	14.8	1.34	1.21			0.04	0.47	1.1	3.6	4.6	0.15	305	79.6	10.4	2.4	96.7	3.46	0.87				27.948		753
	16K13-H8		73.1	0.19	14.5	1.33	1.2			0.04	0.46	1.1	3.6	4.6	0.16	336	80	10.7	2.6	105	3.55	2.66				29.5775		758
	16K14-H1	Fine-grained porphyritic biotite granite	73.1	0.21	14.4	1.58	1.42			0.04	0.46	0.9	2.7	5.3	0.15	445	91.7	10.3	1.9	129	4.2	50.6				30.7143		784
	16K14-H2		73.5	0.2	14.1	1.67	1.5			0.04	0.46	1	2.7	4.9	0.17	467	94.5	10.9	2	120	3.98	44.4				30.1508		778
	16K14-H3		73	0.21	14.6	1.47	1.32			0.04	0.48	1.1	2.9	5	0.16	414	88.4	11.2	1.7	119	3.8	7.51				31.3158		775
	16K14-H4		73	0.21	14.5	1.62	1.46			0.04	0.5	1.1	2.8	5.1	0.15	390	92.2	9.8	1.7	130	4.26	6.18				30.5164		782
	16K14-H5		72.9	0.21	14.6	1.4	1.26			0.03	0.52	1.2	3.3	4.8	0.15	314	84.4	8.8	1.7	117	3.51	9.87				33.3333		768
	16K14-H6		73	0.22	14.6	1.5	1.35			0.04	0.53	1.2	3.2	4.7	0.15	335	104	9.3	1.5	113	3.54	5.86				31.9209		768
	16K14-H7		72.6	0.21	14.6	1.42	1.28			0.03	0.61	1.2	3.3	4.9	0.16	331	86.4	8.9	1.7	120	3.75	3.97				32		769
	17K2-01	Fine-grained biotite granite	71.7	0.2	14.9	1.42	1.28			0.03	0.48	1.1	3.2	5.2	0.16	426	81.9	8.3	1.6	102	3.11	211				32.7974		757
	17K2-02		72.7	0.2	14.6	1.47	1.32			0.04	0.5	0.9	3.2	5	0.15	390	78	8.7	1.6	102	3.27	84.4				31.1927		761
	17K2-03		73.3	0.2	14.2	1.44	1.3			0.03	0.5	0.9	2.9	5.2	0.15	422	78.9	8.4	1.5	81.7	3.04	132				26.875		743
	17K2-04		72.6	0.2	14.7	1.41	1.27			0.04	0.48	1	2.8	5.3	0.15	443	89.9	7.7	1.4	105	3.15	83				33.3333		765
	17K2-06		73.1	0.2	14.3	1.54	1.39			0.03	0.48	0.9	2.9	5.2	0.14	437	79.7	8.3	1.4	97.7	3.24	135				30.1543		758
	17K3-H1	Biotite granite porphyry	73.5	0.1	14.7	0.87	0.78			0.03	0.24	0.7	3.6	4.5	0.22	556	24.7	15.6	3.8	41.2	1.99	14.6				20.7035		693
	17K3-H2		73.1	0.1	15.1	0.97	0.87			0.03	0.24	0.7	3.9	4.4	0.23	558	22.8	15.2	3.8	38.1	2.02	14.2				18.8614		686
	17K3-H4		73.8	0.1	14.7	0.92	0.83			0.03	0.23	0.7	3.9	4.3	0.21	558	21.8	15.6	4.2	41.4	2.05	12.4				20.1951		691
	17K3-H5		73.2	0.1	15	0.99	0.89			0.04	0.24	0.7	3.9	4.5	0.23	542	23.1	15.8	4	36.6	1.95	31.9				18.7692		683
	17K3-H6		74.3	0.09	14.6	0.87	0.78			0.03	0.24	0.7	3.8	4.1	0.2	526	21.7	15.2	3.7	40.2	1.83	10.7				21.9672		692
	16SM-04		73.7	0.11	14.5	1.05	0.94			0.06	0.29	0.8	2.4	5.5	0.2	683	52.7	14	3.2	61.5	2.69	459				22.8625		728
	16SM-05		74	0.12	14.6	1.05	0.94			0.06	0.28	0.8	2.3	5.5	0.21	718	52	15.5	3.2	63.3	2.83	417				22.3675		731
	16SM-07		74.7	0.12	14	1.42	1.28			0.05	0.3	0.7	2.3	4.8	0.19	613	65.3	13.3	2.9	53.6	2.37	156				22.616		723
	MGD-08	granite porphyry	72.75	0.24	13.99		1.48	0.21	1.29	0.02	0.43	0.88	3.38	4.81	0.16	327	49.2	12.5	2.43	106	3.63	13		6.64634	5.14403	29.2011	0.162791	760	Chen et al., 2018
	GB-2-46		73.49	0.22	14.21		2.75	1.57	1.34	0.03	0.4	0.65	3.44	4.99	0.17	254	64.3	13	2.32	103	4.43	14.6		3.95023	5.60345	23.2506	1.17164	759
	GB-2-47		72.74	0.23	14.56		2.92	1.7	1.39	0.03	0.42	0.79	3.94	4.47	0.17	257	71.7	13.3	2.17	126	4.95	24.2		3.58438	6.12903	25.4545	1.22302	773
	GB-2-48		73.1	0.23	14.19		2.94	1.66	1.45	0.02	0.44	0.76	3.64	4.96	0.17	270	70.1	13.8	2.1	125	4.88	62.8		3.85164	6.57143	25.6148	1.14483	771
	MGD-01		72.76	0.09	14.69		1.06	0.47	0.64	0.04	0.27	0.48	3.16	4.9	0.3	539	22.3	17.1	5.25	51.7	2.34	6.02		24.1704	3.25714	22.094	0.734375	714
	MGD-02		73.54	0.09	14.34		1.01	0.49	0.57	0.04	0.27	0.47	3.54	4.59	0.29	497	19.2	16.3	4.57	50.1	2.13	7.68		25.8854	3.56674	23.5211	0.859649	709
	MGD-03		73.35	0.09	14.27		0.99	0.53	0.51	0.04	0.27	0.48	3.55	4.61	0.3	499	17.1	16.4	4.91	46.7	2.05	6.55		29.1813	3.34012	22.7805	1.03922	703
	GB-2-11		73.77	0.08	14.29		1.66	1.01	0.75	0.04	0.22	0.59	3.07	5.22	0.29	517	31	17.9	4.43	52.7	2.63	13.7		16.6774	4.04063	20.038	1.34667	711
	GB-2-12		73.7	0.08	14.4		1.48	1	0.58	0.04	0.21	0.58	3.42	4.87	0.28	456	28	16.8	4.07	51	2.6	12.6		16.2857	4.12776	19.6154	1.72414	708
	GB-2-13		73.85	0.09	14.39		1.9	1.09	0.92	0.05	0.23	0.6	3.73	4.46	0.29	450	23.3	19.5	4.96	53.8	2.75	21.4		19.3133	3.93145	19.5636	1.18478	711
	GB-2-44		76.66	0.04	12.97		1.11	0.66	0.52	0.02	0.09	0.38	3.43	4.94	0.2	252	27.3	4.71	1.64	19.4	1.68	33.4		9.23077	2.87195	11.5476	1.26923	638
	GB-2-45		76.65	0.07	13.51		3.37	2.21	1.38	0.05	0.14	0.36	4.79	1.32	0.18	75.8	10.5	11.5	6.22	44.5	6.18	20.9		7.21905	1.84887	7.20065	1.60145	708
	GB-2-9	muscovite granite	77.69	0.08	13.37		0.82	0.46	0.41	0.01	0.14	0.41	4.71	1.64	0.2	174	56.9	2.36	0.63	37.7	1.63	25.3		3.058	3.74603	23.1288	1.12195	695
	MGD-04		78.02	0.12	12.33		1.23	0.34	0.92	0.03	0.38	0.39	3.76	2.02	0.14	182	48.3	3.76	0.67	65	2.37	13.6	64.8	3.76812	5.61194	27.4262	0.369565	740
	MGD-05		76.67	0.06	13.58		0.73	0.2	0.55	0.01	0.2	0.43	5.3	1.33	0.18	105	43	7.23	2.75	28.8	1.8	77.8	35.8	2.44186	2.62909	16	0.363636	672
	MGD-07		77.15	0.07	13.27		1.02	0.22	0.82	0.02	0.2	0.51	5.37	1.13	0.18	105	45.6	8.64	3.67	28.5	1.84	66.6	28.7	2.30263	2.35422	15.4891	0.268293	669
	MGD-09		75.58	0.03	13.5		1.14	0.19	0.97	0.02	0.22	0.92	4.85	1.49	0.16	121	48.1	6.37	3.2	27.3	1.64	219	40.1	2.51559	1.99062	16.6463	0.195876	665
	MGD-10		78.86	0.06	12.34		0.63	0.01	0.62	0.01	0.15	0.35	4.15	1.81	0.2	236	46.5	3.56	1.13	27	1.56	74	109	5.07527	3.15044	17.3077	0.016129	673
	MGD-11		77.64	0.06	12.75		0.92	0.23	0.71	0.02	0.28	0.62	4.37	1.59	0.09	92.1	44.6	2.01	0.36	51.5	2.03	94.9	39.7	2.06502	5.58333	25.3695	0.323944	717
	GB-2-14		77.07	0.05	12.64		1.55	0.87	0.77	0.04	0.13	0.54	3.17	4.59	0.15	221	30	4.02	1.46	30	2	195		7.36667	2.75342	15	1.12987	669
	GB-2-36		76.82	0.04	12.79		1.16	0.65	0.58	0.03	0.11	0.37	2.96	5.39	0.15	231	35.3	3.37	1.02	26.3	1.74	23.3		6.54391	3.30392	15.1149	1.12069	659
	GB-2-37		77.59	0.03	12.59		0.96	0.58	0.44	0.02	0.09	0.35	3.35	4.73	0.18	256	21.8	2.43	0.56	27.1	1.97	8.48		11.7431	4.33929	13.7563	1.31818	661
	GB-2-38		77.33	0.05	12.68		1.18	0.68	0.57	0.02	0.11	0.41	3.33	4.71	0.19	265	28	3.6	2.64	21.6	1.31	589		9.46429	1.36364	16.4885	1.19298	646
	GB-2-39		76.96	0.05	13.2		1.27	0.72	0.62	0.03	0.13	0.43	3.89	3.73	0.19	236	36	4.65	1.48	35.4	2.36	1628		6.55556	3.14189	15	1.16129	682
	16K4-H1	porphyritic two-mica granite	72.94	0.11	14.98	1.06	0.95			0.05	0.28	0.67	3.9	4.8	0.25	460	45.7	14.9	6.36	62.1	2.31	6.42		10.0656	2.34277	26.8831		719	Wu et al., 2019
	16K4-H2		73.58	0.11	14.67	1.08	0.97			0.06	0.29	0.71	3.61	4.51	0.26	484	40.6	18.1	8.87	53.2	2.14	28.6		11.9212	2.04059	24.8598		712
	16K4-H3		72.83	0.1	15.03	1.12	1.01			0.06	0.29	0.72	3.71	4.78	0.26	543	46	18.6	7.9	54.5	2.13	7.84		11.8043	2.35443	25.5869		711
	16K11-H1		74.39	0.11	14.17	1.03	0.93			0.05	0.26	0.74	3.57	4.48	0.23	372	45	13.7	5.12	57.6	2.18	17.1		8.26667	2.67578	26.422		716
	16K11-H2		73.98	0.11	14.51	1	0.9			0.05	0.25	0.71	3.63	4.56	0.23	368	48.4	12.1	4.22	58.6	2.22	5.4		7.60331	2.8673	26.3964		718
	16K11-H3		73.65	0.11	14.62	1	0.9			0.05	0.28	0.69	3.63	4.8	0.23	384	45.4	12.7	4.24	52.6	2.02	4.98		8.45815	2.99528	26.0396		708
	16K11-H4		74.59	0.12	14.12	1.02	0.92			0.05	0.25	0.72	3.66	4.24	0.22	377	45.5	15.2	3.7	63.4	2.3	2.66		8.28571	4.10811	27.5652		724
	16K11-H5		74.51	0.11	14.1	1.05	0.94			0.05	0.25	0.75	3.46	4.41	0.23	405	42	13.4	4.25	58.2	2.18	9.31		9.64286	3.15294	26.6972		718
	16K12-H1		74.24	0.11	14.47	0.97	0.87			0.06	0.23	0.8	3.54	4.13	0.3	488	30.7	16.6	5.99	53.4	2.06	17.3		15.8958	2.77129	25.9223		714
	16K12-H2		73.84	0.12	14.4	1.16	1.04			0.08	0.27	0.79	3.57	4.28	0.31	536	39.2	17.4	6.22	61.1	2.3	52.5		13.6735	2.79743	26.5652		722
Xianglushan W deposit	15XLS -38-1	biotite granite	77.46	0.08	12.09			0.07	0.48	0.03	0.12	0.58	3.47	4.39	0.03	312	11.2	15.1	2.6	62.6	3.44	10.3	3.04	27.8571	5.80769	18.1977	0.145833	716.997	Dai, 2018
	15XLS -38-3		76.3	0.08	12.86			0.01	0.81	0.04	0.12	0.57	3.66	4.7	0.03	366	8.15	17.1	2.84	83	4.63	20.3	4.89	44.908	6.02113	17.9266	0.0123457	737.683
	15XLS -38-4		76.67	0.08	12.4			0.01	0.61	0.03	0.12	0.54	3.37	4.84	0.03	338	10.2	14.8	2.62	67.7	3.84	8.44	3.12	33.1373	5.64885	17.6302	0.0163934	722.425
	15XLS -38-5		76.65	0.08	12.54			0.01	0.7	0.03	0.13	0.46	3.61	4.69	0.03	328	13.9	16.6	2.92	71.9	4.22	9.68	3.18	23.5971	5.68493	17.0379	0.0142857	727.036
	15XLS -38-6		76.63	0.08	12.66			0.06	0.71	0.04	0.12	0.51	3.74	4.53	0.03	349	9.74	17.3	2.65	76.4	4	2.9	4.69	35.8316	6.5283	19.1	0.084507	731.434
	15XLS -38-7		76.01	0.09	12.84			0.06	0.72	0.04	0.13	0.53	3.75	4.62	0.03	364	9.49	18.3	2.97	82.1	4.66	3.05	4.51	38.3562	6.16162	17.618	0.0833333	736.709
	15XLS -38-8		76.89	0.08	12.79			0.07	0.68	0.04	0.12	0.53	3.74	4.56	0.03	338	9.74	17.2	2.88	86.7	4.94	2.81	4.24	34.7023	5.97222	17.5506	0.102941	741.751
	15XLS -67-1	aplite	76.55	0.03	13.91			0.01	0.28	0.01	0.05	5.99	1.68	0.14	0.02	12.4	173	27.8	5.61	33.5	3.43	294	0.86	0.0716763	4.95544	9.76676	0.0357143	669.173
	15XLS -67-2		76.72	0.04	13.63			0.13	0.18	0.02	0.11	5.12	2.6	0.15	0.02	12.7	173	32.7	5.35	38	3.44	262	1.63	0.0734104	6.11215	11.0465	0.722222	676.251
	15XLS -67-3		78.62	0.03	13.09			0.21	0.29	0.05	0.07	4.44	2.78	0.18	0.02	11.2	159	32.9	5.43	33.2	3.31	118	0.67	0.0704403	6.05893	10.0302	0.724138	670.288
	15XLS -67-4		77.79	0.03	13.14			0.01	0.17	0.01	0.06	4.87	2.32	0.12	0.02	8.63	146	26.7	5.23	33.4	3.23	53.5	1.5	0.0591096	5.10516	10.3406	0.0588235	671.444
	15XLS -67-5		76.65	0.03	13.3			0.01	0.17	0.01	0.05	4.76	2.68	0.11	0.02	8.29	156	30.4	5.68	32.1	3.23	86.7	1.85	0.053141	5.35211	9.93808	0.0588235	666.549
Xiaoyao W deposit	Xy06-2		67.04	0.5	14.85	2.84	2.56	0.4	2.19	0.07	1.45	4.96	4.12	3.31	0.19	82.6	491	9.08	0.74	161.9	6.09			0.168228	12.2703	26.5846	0.182648	739	Zhou et al., 2012
	xy08-2		64.05	0.45	16.31	3.37	3.03	0.28	2.78	0.07	1.24	5.32	4.38	3.89	0.2	98.8	542	9.94	0.81	168.2	6.79			0.182288	12.2716	24.7717	0.100719	736
	xy09		65.16	0.64	15.31	4.58	4.12	1.9	2.41	0.07	2.32	4.17	4.13	2.51	0.23	80.7	570	8.08	0.62	163.7	7.64			0.141579	13.0323	21.4267	0.788382	758
	JX01-B9		67.71	0.44	15.42	1.88	1.69	0.37	1.36	0.05	1.57	4.06	3.85	3.79	0.16	98.7	494	8.28	0.74	136.1	6.5			0.199798	11.1892	20.9385	0.272059	743
	JX01-B12		68.73	0.44	15.38	1.98	1.78	0.8	1.06	0.04	1.06	3.35	3.66	4.52	0.15	123	467	8.86	0.73	129.6	5			0.263383	12.137	25.92	0.754717	746
	JX01-B14		65.95	0.35	17.25	1.5	1.35	1.23	0.24	0.03	0.7	0.31	2.05	9.44	0.07	486	391	6.63	0.74	89.9	5			1.24297	8.95946	17.98		744
	JX01-B15		66.52	0.59	15.27	4.62	4.16	1.79	2.55	0.07	2.12	3.93	3.36	2.73	0.19	92.6	549	7.66	0.65	144.6	5			0.16867	11.7846	28.92	0.701961	761
	JX01-B16		64.77	0.69	15.6	5.02	4.52	1.83	2.87	0.08	2.68	4.17	3.53	2.79	0.24	85.2	541	8.43	0.69	139.5	5			0.157486	12.2174	27.9	0.637631	751
	JX01-B17		69.64	0.51	15.5	1.35	1.21	0.55	0.72	0.05	0.9	3.14	3.06	4.94	0.14	114	431	8.5	0.86	144.7	4.5			0.264501	9.88372	32.1556	0.763889	764
	JX01-B19		66.86	0.58	14.9	4.29	3.86	1.04	2.92	0.06	2.16	3.69	3.33	3.25	0.2	114	510	9.79	0.97	146.4	4.5			0.223529	10.0928	32.5333	0.356164	759
	JX01-B22		66.05	0.59	15.13	4.41	3.97	1.36	2.74	0.04	2.27	3.96	3.27	3.33	0.21	119	529	7.64	0.59	136.5	5			0.224953	12.9492	27.3	0.49635	750
	JX01-B28		66.21	0.56	15.48	3.94	3.55	0.46	3.13	0.06	1.81	4.19	3.07	3.6	0.18	83.9	551	9.07	0.78	138.4	5			0.152269	11.6282	27.68	0.146965	752
	15XY-D193-1	Granodiorite	63.97	0.63	16	4.84	4.36	0.99	3.23	0.08	2.22	4.15	3.69	2.83	0.19	109	549	8.39	0.8	177	4.93	41.1		0.198543	10.4875	35.9026	0.306502	771	Su et al., 2018
	15XY-D193-2		64.45	0.63	15.82	4.79	4.31	0.84	3.32	0.08	2.19	4.06	3.62	2.84	0.19	109	552	8.14	0.79	178	4.93	50.7		0.197464	10.3038	36.1055	0.253012	773
	15XY-183		65.3	0.58	15.96	4.06	3.65	1.41	2.23	0.05	1.89	3.82	3.7	2.94	0.2	117	605	6.22	0.5	174	4.69	6.41		0.193388	12.44	37.1002	0.632287	776
	15XY-186		65.42	0.56	15.95	3.93	3.54	1.37	2.15	0.05	1.85	4.01	3.75	2.93	0.19	106	606	6.35	0.48	195	5.17	7.21		0.174917	13.2292	37.7176	0.637209	782
	15XY-187		65.01	0.55	15.57	3.81	3.43	1.29	2.12	0.05	1.82	3.93	3.5	3.53	0.18	122	582	6.29	0.51	169	4.46	27		0.209622	12.3333	37.8924	0.608491	767
	15XY-188		65.29	0.56	16.22	3.96	3.56	1.44	2.12	0.06	1.83	3.97	3.86	2.88	0.19	105	607	5.9	0.49	183	5.19	0.83		0.172982	12.0408	35.2601	0.679245	778
	15XY-193		63.67	0.61	15.94	4.31	3.88	0.85	2.91	0.07	2.13	4.98	3.74	2.91	0.24	77.2	820	7.19	0.55	194	5.45	0.83		0.0941463	13.0727	35.5963	0.292096	765
	15XY-195		63.76	0.61	15.99	4.46	4.01	0.7	3.16	0.07	2.1	4.87	3.71	2.9	0.24	76.1	790	6.67	0.49	189	5.19	0.58		0.0963291	13.6122	36.4162	0.221519	766
	15XY-196		64.01	0.6	15.77	4.33	3.9	0.47	3.24	0.06	2.08	4.75	3.61	3.06	0.23	81.4	787	6.55	0.5	185	4.88	1.16		0.103431	13.1	37.9098	0.145062	764
	15XY-10		64.23	0.56	16.15	4.52	4.07	0.58	3.31	0.07	1.98	4.03	3.83	2.61	0.18	70	577	6.8	0.52	187	4.93	1		0.121317	13.0769	37.931	0.175227	780
	15XY-11		64.11	0.55	16.27	4.43	3.99	0.24	3.52	0.07	1.79	4.48	4.03	2.42	0.19	60.9	565	6.33	0.53	175	4.95	0.15		0.107788	11.9434	35.3535	0.0681818	768
	15XY-165		63.17	0.62	15.97	4.28	3.85	0.47	3.2	0.07	2.16	5.05	3.71	3.06	0.25	77.6	838	6.65	0.53	201	5.27	0.9		0.0926014	12.5472	38.1404	0.146875	766
Dongyuan W deposit	ZK002-04	Granodiorite porphyry	64.46	0.42	13.51	2.97				0.02	0.65	2.39	2.66	4.93	0.13	240	123	8.1	0.7	67.6	2.2	969		1.95122	11.5714	30.7273		705	Wang et al., 2017
	ZK002-05		67.3	0.38	13.08	3				0.02	0.6	1.98	2.71	4.65	0.12	222	151	10.1	0.9	72.6	2.4	452		1.4702	11.2222	30.25		716
	ZK002-07		65.75	0.45	14.78	2.7				0.02	0.98	1.81	3.05	4.12	0.14	216	140	8.7	0.8	77.6	2.5	139		1.54286	10.875	31.04		732
	ZK002-08		66.86	0.44	14.05	2.06				0.02	0.67	1.82	2.57	5.82	0.14	269	127	8.4	0.8	81	2.6	743		2.11811	10.5	31.1538		724
	ZK002-16		64.71	0.43	14.11	2.8				0.03	0.74	2.77	2.95	3.76	0.13	205	227	8.5	0.8	70	2.3	149		0.903084	10.625	30.4348		712
	ZK002-17		65.56	0.43	14.33	2.33				0.03	0.74	2.83	3.01	4.25	0.13	226	194	8.3	0.7	74.8	2.5	399		1.16495	11.8571	29.92		713
	ZK002-21		67.04	0.4	13.54	2.58				0.03	0.71	2.47	2.49	4.61	0.12	230	201	8	0.7	64.4	2.2	342		1.14428	11.4286	29.2727		707
	ZK002-35		63.65	0.41	14.31	2.43				0.03	0.69	2.76	2.76	4.18	0.13	231	192	8.2	0.7	67.7	2.3	279		1.20312	11.7143	29.4348		709
	ZK002-42		68.05	0.38	11.97	2.57				0.03	0.58	1.96	1.96	4.84	0.11	229	264	7.8	0.7	60.8	2	1140		0.867424	11.1429	30.4		706
Shangjinshan W deposit	ZKN21-1	Granodiorite	74.02	0.19	13.24	1.73	1.56			0.04	0.31	1.45	2.5	4.84	0.05	264	109.5	9.1	0.72	40.4	1.6	23.3		2.41096	12.6389	25.25		686	Tang et al., 2019
	ZKN21-2		72.56	0.16	13.56	1.58	1.42			0.06	0.3	1.51	3.11	5.13	0.07	257	111	10.8	0.84	40.3	1.7	19.9		2.31532	12.8571	23.7059		677
	ZKN01-1		68.33	0.52	14.57	3.85	3.47			0.09	1.03	3.13	3.3	3.37	0.17	150	234	12.3	1	33.9	1.3	2.8		0.641026	12.3	26.0769		658
	ZKN01-2		67.93	0.34	15.24	2.7	2.43			0.06	0.62	2.27	3.23	4.27	0.11	148.5	280	8.8	0.81	18.6	0.7	4.8		0.530357	10.8642	26.5714		627
	ZKN01-3		67.18	0.48	15.58	3.11	2.8			0.08	0.91	2.75	3.16	4.43	0.15	199.5	282	11	0.8	43	1.2	6.8		0.707447	13.75	35.8333		677
	ZK45-1		71.41	0.32	13.52	2.63	2.37			0.07	0.6	1.92	3.05	4.24	0.12	249	166	15.7	1.98	58.8	2.1	0.9		1.5	7.92929	28		705
	ZK45-2		70.92	0.32	13.78	2.74	2.47			0.07	0.59	1.96	3.11	4.28	0.12	250	180	15.7	2.16	60	2.2	2.1		1.38889	7.26852	27.2727		706
	ZK45-3		71.56	0.31	13.92	2.49	2.24			0.06	0.57	1.97	3.13	4.52	0.12	267	165	15	1.7	55	2.4	7.9		1.61818	8.82353	22.9167		699
Yangchuling W-Mo deposit	YCL-B1	granodiorite	67.58	0.52	15.72	3.96	3.56	1.2	2.48	0.07	1.55	3.17	3.35	3.98	0.17	111	200	7.78	1.1	120	3.86	2.11		0.555	7.07273	31.0881	0.483871	750	Mao et al., 2017
	YCL-B7		68.54	0.5	14.71	3.86	3.47	0.744444	2.8	0.07	1.51	3.11	3.12	3.47	0.16	161	231	7.4	0.86	148	4.27	268		0.69697	8.60465	34.6604	0.265873	771
	YCL-B21		68.62	0.49	15.01	4.03	3.63	1.45556	2.32	0.06	1.44	3.12	3.38	3.26	0.15	116	190	7.13	1.09	145	4.53	4.38		0.610526	6.54128	32.0088	0.627395	769
	YCL-B22		68.15	0.49	15.21	3.67	3.3	0.777778	2.6	0.07	1.37	2.93	3.35	3.49	0.15	152	227	7.23	0.82	138	4.03	17.4		0.669604	8.81707	34.2432	0.299145	767
	YCL-B23		67.53	0.53	15.56	3.93	3.54	1.12222	2.53	0.07	1.6	3.39	3.39	3.42	0.16	152	249	8.19	1.21	144	4.6	15.9		0.610442	6.7686	31.3043	0.443566	765
	YCL-B24		67.38	0.53	15.63	4.02	3.62	1.03333	2.69	0.07	1.62	3.43	3.38	3.26	0.16	129	244	7.53	0.9	136	4.07	1.89		0.528689	8.36667	33.4152	0.384139	762
	YCL-B8	monzogranidic porphyry	70.04	0.43	15.55	2.72	2.45	0.488889	2.01	0.03	0.96	2.5	3.27	4.54	0.13	136	211	6.88	0.82	115	3.44	29.5		0.64455	8.39024	33.4302	0.243228	754
	YCL-B10		69.13	0.47	15.57	2.99	2.69	0.0777778	2.62	0.04	0.96	2.84	3.25	4.19	0.15	150	238	7.67	0.81	138	4.06	122		0.630252	9.46914	33.9901	0.0296862	767
	YCL-B11		69.55	0.48	15.33	3.01	2.71	0.111111	2.61	0.03	1	2.55	3.01	4.7	0.15	154	236	7.78	0.91	136	4.16	122		0.652542	8.54945	32.6923	0.0425713	768
	YCL-B27		68.53	0.53	15.51	3.21	2.89	0.3	2.62	0.04	1.05	2.93	3.28	4	0.16	152	247	8.22	0.85	140	4.09	241		0.615385	9.67059	34.2298	0.114504	767
	YCL-B32		69.43	0.33	14.85	2.2	1.98	0.388889	1.63	0.02	0.75	1.83	2.92	5.2	0.12	157	178	8.47	1.12	114	3.63	67.8		0.882022	7.5625	31.405	0.238582	758
	YCL-B33		69	0.47	15.45	2.93	2.64	0.2	2.46	0.04	0.96	2.8	3.25	4.11	0.15	130	252	8.59	1	143	4.23	456		0.515873	8.59	33.8061	0.0813008	771
Fe2O3T and FeOT represents the total Fe content is expressed as Fe2O3 and FeO respectively.
References
Chen, F., Wang, D. H., Du, J. G., Xu, W., Wang, K. Y., Yu, Y. L., and Tang, J. L., 2015a, Geochemical Characteristics and LA-ICP-MS Zircon U-Pb Age of the Lanhualing Granite in Ningguo, Anhui Province: Geotectonica Et Metallogenia, v. 39, p. 369-377(in Chinese with English abstract).
Chen, G. H., Shu, L. S., Shu, L. M., Zhang, C., and Ouyang, Y., 2015b, Geological characteristics and mineralization setting of the Zhuxi tungsten (copper) polymetallic deposit in the Eastern Jiangnan Orogen: Science China Earth Sciences, v. 59, p. 803-823(in Chinese with English abstract).
Chen, W., Chen, B., and Sun, K., 2018, Petrogenesis of the Maogongdong highly differentiated granite in the Dahutang tungsten ore field, Jiangxi Province: Acta Petrologica Sinica, v. 34, p. 1704-1724(in Chinese with English abstract).
Chen, X., Wang, Y., Sun, W., and Yang, X., 2013, Zircon U-Pb chronology, geochemistry and genesis of the Zhuxiling granite in Ningguo, Southern Anhui: Acta Geol Sin, v. 87, p. 1662-1678(in Chinese with English abstract).
Duan, X., Chen, B., Sun, K., Wang, Z., Yan, X., and Zhang, Z., 2019, Accessory mineral chemistry as a monitor of petrogenetic and metallogenetic processes: A comparative study of zircon and apatite from Wushan Cu- and Zhuxiling W(Mo)-mineralization-related granitoids: Ore Geology Reviews, p. 102940, https://doi.org/10.1016/j.oregeorev.2019.102940.
Fan, X., Mavrogenes, J., Hou, Z., Zhang, Z., Wu, X., and Dai, J., 2019, Petrogenesis and metallogenic significance of multistage granites in Shimensi tungsten polymetallic deposit, Dahutang giant ore field, South China: Lithos, v. 336-337, p. 326-344.
Huang, L. C., and Jiang, S. Y., 2014, Highly fractionated S-type granites from the giant Dahutang tungsten deposit in Jiangnan Orogen, Southeast China: geochronology, petrogenesis and their relationship with W-mineralization: Lithos, v. 202–203, p. 207-226.
Huang, M., 2017, Metallogenetic ages and geochemical characteristics of Zhuxiling W-Ag polymetallic deposit in Ningguo City, Southern Anhui province [Master: Hefei University of Technology, p. 1-64 (in Chinese with English abstract).
Kong, Z., Liang, T., Mao, J., Xu, S., Xu, H., Yan, P., and Jin, X., 2018, Study on perogenesis of granodiorite, metallogenic epoch and petrogenetic-metallogenetic setting in the Zhuxiling tungsten polymetallic deposit, southern Anhui Province, China: Acta Petrologica Sinica, v. 34, p. 2632-2656(in Chinese with English abstract).
Li, P. J., Yu, X. Q., Li, H. Y., Qiu, J. T., and Zhou, X., 2013, Jurassic–Cretaceous tectonic evolution of Southeast China: geochronological and geochemical constraints of Yanshanian granitoids: International Geology Review, v. 55, p. 1202-1219.
Li, Y., Pan, X., Zhao, M., Chen, G., Zhang, T., Liu, Q., and Zhang, C., 2014, LA-ICP-MS zircon U-Pb age, geochemical features and relations to the W-Cu mineralization of granitic porphyry in Zhuxi skarn deposit, Jingdezhen, Jiangxi: Geol Rev, v. 60, p. 693-708(in Chinese with English abstract).
Liu, J. W., Chen, B., Chen, J. S., Li, Z., and Sun, K. K., 2017, Highly differentiated granite from the Zhuxi tungsten (copper) deposit in northeastern Jiangxi Province:Petrogenesis and their relationship with W-mineralization: Acta Petrologica Sinica, v. 33, p. 3161-3182(in Chinese with English abstract).
Mao, J. W., Xiong, B. K., Liu, J., Pirajno, F., Cheng, Y. B., Ye, H. S., Song, S. W., and Dai, P., 2017, Molybdenite Re/Os dating, zircon U–Pb age and geochemistry of granitoids in the Yangchuling porphyry W–Mo deposit (Jiangnan tungsten ore belt), China: Implications for petrogenesis, mineralization and geodynamic setting: Lithos, v. 286–287, p. 35-52.
Mao, Z. H., Liu, J. J., Mao, J. W., Deng, J., Zhang, F., Meng, X. Y., Xiong, B. K., Xiang, X. K., and Luo, X. H., 2015, Geochronology and geochemistry of granitoids related to the giant Dahutang tungsten deposit, middle Yangtze River region, China: Implications for petrogenesis, geodynamic setting, and mineralization: Gondwana Research, v. 28, p. 816-836.
Pan, X., Hou, Z., Zhao, M., Chen, G., Rao, J., Li, Y., Wei, J., and Ouyang, Y., 2018, Geochronology and geochemistry of the granites from the Zhuxi W-Cu ore deposit in South China: Implication for petrogenesis, geodynamical setting and mineralization: Lithos, v. 304-307, p. 155-179.
Song, G. X., Qin, K. Z., Li, G. M., Liu, T. B., Li, J. X., Li, X. H., and Chang, Z. S., 2012, Geochronologic and isotope geochemical constraints on magmatism and associated W–Mo mineralization of the Jitoushan W–Mo deposit, middle–lower Yangtze Valley: International Geology Review, v. 54, p. 1532-1547.
Song, S. W., Mao, J. W., Zhu, Y. F., Yao, Z. Y., Chen, G. H., Rao, J. F., and Ouyang, Y. P., 2018, Partial-melting of fertile metasedimentary rocks controlling the ore formation in the Jiangnan porphyry-skarn tungsten belt, south China: A case study at the giant Zhuxi W-Cu skarn deposit: Lithos, v. 304-307, p. 180-199.
Su, Q., Mao, J., Wu, S., Zhang, Z., and Xu, S., 2018, Geochronology and geochemistry of the granitoids and ore – forming age in the Xiaoyao tungsten polymetallic skarn deposit in the Jiangnan Massif tungsten belt, China: Implications for their petrogenesis, geodynamic setting, and mineralization: Lithos, v. 296-299, p. 365-381.
Tang, C., Yang, X., and Cao, J., 2019, Genesis of the Shangjinshan W–Mo polymetallic deposit in the Eastern Jiangnan tungsten belt: Evidences from geochemistry, geochronology and zircon Hf isotope analyses: Ore Geology Reviews, v. 115, p. 103172, https://doi.org/10.1016/j.oregeorev.2019.103172.
Wang, X., Liu, Z., Liu, S., Wang, C., Liu, J., Wan, H., Chen, G., Zhang, S., and Liu, X., 2015, LA-ICP MS Zircon U-Pb dating and petrologic geochemistry of fine-grained granite from Zhuxi Cu-W deposit, Jiangxi Province and its geological significance: Rock Miner Anal, v. 34, p. 592-599(in Chinese with English abstract).
Wang, Y., van den Kerkhof, A., Xiao, Y., Sun, H., Yang, X., Lai, J., and Wang, Y., 2017, Geochemistry and fluid inclusions of scheelite-mineralized granodiorite porphyries from southern Anhui Province, China: Ore Geology Reviews, v. 89, p. 988-1005.
Watson, E. B., and Harrison, T. M., 1983, Zircon saturation revisited: temperature and composition effects in a variety of crustal magma types: Earth and Planetary Science Letters, v. 64, p. 295-304.
Wei, W. F., Shen, N. P., Yan, B., Lai, C. K., Yang, J. H., Gao, W., and Liang, F., 2018, Petrogenesis of ore-forming granites with implications for W-mineralization in the super-large Shimensi tungsten-dominated polymetallic deposit in northern Jiangxi Province, South China: Ore Geology Reviews, v. 95, p. 1123-1139.
Wu, X., Zhang, Z., Zheng, Y., Dai, J., Fan, X., and Sheng, Y., 2019, Magmatism, genesis and significance of multi-stage porphyry-like granite in the giant Dahutang tungsten deposit, northern Jiangxi Province: Acta petrologica et mineralogica, v. 38, p. 318-338(in Chinese with English abstract).
Xiang, X. K., Yin, Q. Q., Sun, D. M., and Zhong, B., 2015a, Petrogenesis of Yanshanian granites in Shimenshi, Northern Jiangxi Province: Sr-Nd isotopic evidence: Geology of Jiangxi, v. 60, p. 79-87(in Chinese with English abstract).
Xiang, X. K., Yin, Q. Q., Sun, K. K., and Chen, B., 2015b, Origin of the Dahutang syn-collisional granite-porphyry in the middle segment of the Jiangnan orogen:Zircon U-Pb geochronologic,geochemical and Nd-Hf isotopic constraints: Acta Petrologica Et Mineralogica, v. 34, p. 581-600(in Chinese with English abstract).
Yan, P., Liang, T., Xu, S., Lu, L., Kong, Z., and Jin, X., 2019, Tracer origin of Zhuxiling granodiorite in the Southern Anhui, China: evidence from mineralogical and geochemical characteristics: Journal of Earth Sciences and Environment, v. 41, p. 141-155(in Chinese with English abstract).
Zhang, D., Zhou, T., Yuan, F., Fan, Y., Chen, X., White, N. C., Ding, N., and Jiang, Q., 2017, Petrogenesis and W-Mo fertility indicators of the Gaojiabang “satellite” granodiorite porphyry in southern Anhui Province, South China: Ore Geology Reviews, v. 88, p. 550-564.
Zhou, J., Ge, W. Y., Jiang, Y. H., Xu, S. F., and Fu, J. Z., 2015, Petrochemistry and mineralogy of Dongyuan tungsten-bearing pluton in eastern Jiangnan Orogen: Geochimica, v. 44, p. 117-130(in Chinese with English abstract).
Zhou, X., Yu, X. Q., Yang, H. M., Wang, D. E., Du, Y. D., and Ke, H. B., 2012, Petrogenesis and geochronology of the high Ba-Sr Kaobeijian granodiorite porphyry, Jixi county, south Anhui province: Acta Petrologica Sinica, v. 28, p. 3403-3417(in Chinese with English abstract).
Zhu, Z. Y., Jiang, S. Y., Hu, J., Gu, L. X., and Li, J. W., 2014, Geochronology, geochemistry, and mineralization of the granodiorite porphyry hosting the Matou Cu-Mo (± W) deposit, Lower Yangtze River metallogenic belt, eastern China: Journal of Asian Earth Sciences, v. 79, p. 623-640.

## Sheet: 1C Southeast Asian Sn belt
Table S1C Geochemical data for the Sn(-W)-related granite in the Southeast Asian Sn belt.
deposit	Pluton*	Rock type	Sample number**	SiO2	TiO2	Al2O3	Fe2O3T	FeOT	Fe2O3	FeO	MnO	MgO	CaO	Na2O	K2O	P2O5	LOI	Total	Rb	Sr	Nb	Ta	Zr	Hf	W	Sn	Rb/Sr	Nb/Ta	Zr/Hf	Fe2O3/FeO	Tzr(°C)	Reference
Hermyingyi and Wagone Sn-W deposits	Wagone pluton	Fresh biotite granite	W1	79.84	0.03	10.96		0.57			0.02	0.06	0.25	2.39	5.11	0.003	0.64	99.87	588	18.8	26	4.3	71	4.7	2	18	31.2766	6.04651	15.1064		733.8	Li et al., 2017
			W2	82.53	0.1	7.81		3.45			0.19	0.16	0.6	1.05	2.66	0.003	1.33	99.87	264	8.6	29.9	3.2	178	7.8	3	31	30.6977	9.34375	22.8205		834.957
			W3	75.62	0.05	12.92		0.79			0.05	0.07	0.58	2.91	5.76	0.005	1.09	99.83	630	26	12.3	2.4	72	4.4	1	24	24.2308	5.125	16.3636		727.342
			W4	75.54	0.06	12.78		1.25			0.08	0.08	0.86	3.33	4.76	0.006	1.11	99.85	583	21.2	33	6.8	93	6.4	6	27	27.5	4.85294	14.5312		745.651
			W5	77.2	0.05	12.46		0.87			0.06	0.08	0.86	3.19	4.79	0.003	0.3	99.86	621	19.2	28.3	6.1	75	4.3	1	23	32.3438	4.63934	17.4419		729.15
			W6	76.12	0.05	12.77		1.16			0.1	0.06	0.72	3.53	4.57	0.003	0.76	99.83	730	10.6	35.5	8.9	78	5.1	3	29	68.8679	3.98876	15.2941		732.874
			W7	75.15	0.02	13.1		0.66			0.38	0.05	0.47	2.63	6.45	0.004	0.91	99.81	710	19.5	24.1	9.4	35	5.8	1	24	36.4103	2.56383	6.03448		674.52
			W8	76.92	0.05	12.33		1.05			0.09	0.06	0.68	3.15	4.67	0.005	0.86	99.85	734	13.6	36	6.8	80	5.5	2	32	53.9706	5.29412	14.5455		737.456
	Hermyingyi pluton	biotite granite	H1	76.5	0.02	12.54		0.99			0.31	0.03	0.56	4.24	4.35	0.01	1.3	100.85	927	4.7	35	16.6	80	6.5	14	90	197.234	2.10843	12.3077		728.291
			H2	77.15	0.02	11.25		1.21			0.27	0.02	0.43	3.16	3.87	0.01	1.1	98.49	837	4.3	28	13.6	70	6	15.5	109	194.651	2.05882	11.6667		731.396
	Hermyingyi pluton	Medium- to fine-grained equigranular or porphyritic granite	HMG01	76.18	0.03	12.95			0.21	0.69	0.18	0.05	0.55	3.52	4.78	0.01	0.84	99.97	1091	9.2	35.6	13.8	73.4	5.3	11.9	69.4	118.587	2.57971	13.8491	0.304348	730.162	Jiang et al., 2017
			HMG03	76.87	0.03	12.42			0.18	0.69	0.19	0.04	0.6	2.6	5.36	0.01	0.96	99.94	1012	8.8	34.7	13.7	80.3	6	9	61.6	115	2.53285	13.3833	0.26087	741.02
			HMG04	75.69	0.02	13.21			0.14	0.46	0.2	0.04	0.63	4.52	4.33	0.01	0.73	99.97	880	7.1	38.5	17.7	91.9	6.8	11.6	47.2	123.944	2.17514	13.5147	0.304348	738.85
			HMG05	75	0.03	13.68			0.28	0.91	0.27	0.05	0.63	3.43	4.35	0.01	1.34	99.96	1116	7.2	41	15	86.7	6.7	151.4	88.8	155	2.73333	12.9403	0.307692	750.605
			HMG06	75.67	0.02	13.38			0.05	0.61	0.15	0.03	0.53	3.91	4.95	0.01	0.68	99.98	1003	5.1	37.3	16.3	68.5	5.5	14.4	56.4	196.667	2.28834	12.4545	0.0819672	720.867
			HMG07	77.17	0.02	12.71			0.1	0.5	0.19	0.03	0.44	3.78	4.3	0.01	0.73	99.97	901	3.5	38.1	19.2	69.8	6.2	7.3	49.5	257.429	1.98438	11.2581	0.2	727.61
			HMG08	76.48	0.02	12.8			0.11	0.89	0.23	0.04	0.59	3.29	4.66	0.01	0.86	99.97	1083	6.5	38.8	12	58.6	4.1	8.2	71	166.615	3.23333	14.2927	0.123596	715.491
	Taungphila pluton	Medium- to fine-grained monzogranite	TPL06	77.46	0.03	12.57			0.3	0.5	0.1	0.04	0.15	3.47	4.54	0.01	0.8	99.98	798	5.5	34.5	11.1	50.3	2.8	5.7	33.6	145.091	3.10811	17.9643	0.6	707.879
			TPL07	77.48	0.03	12.66			0.31	0.41	0.08	0.05	0.18	3.82	4.36	0.01	0.6	99.98	656	5.8	41.6	12.4	69.6	4	3.8	20.3	113.103	3.35484	17.4	0.756098	729.767
			TPL08	77.69	0.04	13.58			0.33	0.84	0.2	0.08	0.61	3.77	4.81	0.01	1.01	99.97	1135	8.6	38	10	85.1	4.8	10.6	82	131.977	3.8	17.7292	0.392857	741.297
			TPL09	77.03	0.03	12.48			0.25	0.53	0.12	0.04	0.68	3.92	4.13	0.01	0.74	99.96	737	8.4	36.4	9	83.2	4.9	5.8	36	87.7381	4.04444	16.9796	0.471698	736.164
	Hermyingyi aplogranite		n=6	76	0.03	12.83				0.99	0.23	0.01	0.5	3.45	4.38	0.01	0.98		979	4	36		75			72	244.75				736.113	Lehmann and Mahawat, 1989
Tagu Sn(-W) deposit/largest in the Myeik area		Biotite granite	G1	71.53	0.31	13.67				2.08	0.04	0.71	1.23	1.62	6.7	0.16	1.74	99.79	911	32	28		188		36	114	28.4688				808.639	Htun et al., 2019
			G2	73.56	0.38	13.68				2.27	0.04	0.79	1.25	2.19	4.61	0.2	0.86	99.83	633	31	32		204		32	57	20.4194				828.758
			G3	71.65	0.32	14.95				2.07	0.04	0.77	1.11	2.28	5.01	0.18	1.42	99.8	634	35	27		197		51	50	18.1143				828.511
			G4	71.79	0.36	14.72				2.08	0.04	0.78	1	2.07	5.02	0.17	1.78	99.81	621	36	29		200		60	56	17.25				833.475
			G5	72.34	0.3	14.45				2.06	0.03	0.67	1.05	2.5	4.46	0.17	1.51	99.54	680	26	32		154		48	63	26.1538				806.71
			G6	71.15	0.27	15.06				1.82	0.03	0.61	1.04	2.39	5.92	0.14	1.35	99.79	801	40	27		158		35	53	20.025				800.06
			G7	71.15	0.31	15.09				1.88	0.06	0.65	1.16	2.37	5.49	0.15	1.51	99.81	846	46	36		181		349	72	18.3913				814.888
			G8	69.48	0.31	15.88				1.58	0.02	0.64	0.71	2.3	7.37	0.18	1.3	99.78	757	66	23		192		8	49	11.4697				813.856
			G9	71.68	0.36	14.36				2.18	0.04	0.72	1.18	2.24	5.59	0.17	1.27	99.78	727	49	29		210		23	59	14.8367				825.28
			G10	75.98	0.3	12.83				1.68	0.06	0.57	0.61	1.89	4.62	0.15	1.09	99.77	835	25	27		217		35	152	33.4				846.659
Lailishan Sn deposit	Lailishan granite	Biotite granite	LLS-1	73.33	0.05	12.69			1.73		0.04	0.75	0.65	3.3	5.03	0.02	1.03		478	7.6	54.5	5.9	182	5.4		12.8	62.8947	9.23729	33.7037		800.943	Chen et al., 2015
			LLS-2	74.1	0.05	12.53			1.62		0.03	0.86	0.78	3.28	5.06	0.02	1.37		565	7.7	44	6.7	187	5.2		15.2	73.3766	6.56716	35.9615		800.322
			LLS-3	74.77	0.05	12.72			1.97		0.04	0.93	0.53	3.68	4.89	0.02	1.64		509	8.3	48.5	5.4	168	5.1		14.7	61.3253	8.98148	32.9412		791.617
			LLS-4	74.94	0.04	13.17			1.27		0.03	0.16	0.44	3.89	4.83	0.01	0.81		550	7.7	91.8	7.8	109	6.2		11.5	71.4286	11.7692	17.5806		758.252
			LLS-5	75.98	0.04	12.79			1.29		0.03	0.02	0.67	3.95	4.64	-	0.54		561	7.6	81	6.7	89	5.3		16.2	73.8158	12.0896	16.7925		737.645
			LLS-6	75.83	0.04	12.76			1.19		0.03	0.22	0.62	3.87	4.68	-	0.58		620	7.7	73	5.8	133	7.6		15.7	80.5195	12.5862	17.5		771.598
			LLS-7	76.11	0.04	12.76			1.24		0.03	0.2	0.66	3.87	4.61	-	0.64		556	6.9	72.9	5.4	91	5.9		14.8	80.5797	13.5	15.4237		740.597
			LLS-8	76.17	0.06	12.69			1.06		0.02	0.05	0.43	3.42	5.35	-	0.71		573	7	75.5	5.3	94	5.5		14.8	81.8571	14.2453	17.0909		745.913
Xiaolonghe Sn deposit	Xiaolonghe granite	Biotite granite	XLHY-1	76.16	0.1	12.51			1.23		0.01	0.06	0.74	3.86	5.11	0.01	1.19		518	13.9	41.3	4.2	149	6.3		18.1	37.2662	9.83333	23.6508		773.771
			XLHY-2	74.74	0.1	12.78			1.32		0.02	0.05	0.98	3.96	5.21	0.01	1.58		513	14.2	41.2	4.3	151	6.5		18.4	36.1268	9.5814	23.2308		769.945
			XLHY-3	76.14	0.02	12.82			1.34		0.03	0.01	0.43	4.31	4.1	-	0.81		433	14.1	37.2	4	138	5.8		11.1	30.7092	9.3	23.7931		777.496
			XLHY-4	75.69	0.1	12.54			1.16		0.02	0.06	0.78	3.57	5.07	0.01	1.05		415	14.7	38.6	5	144	5.8		15.9	28.2313	7.72	24.8276		775.141
			XLHY-5	75.38	0.09	12.66			1.35		0.02	0.07	0.7	3.5	5.26	0.01	0.91		486	15.1	34.8	3.3	152	6.8		12.9	32.1854	10.5455	22.3529		780.757
			XLHY-6	77.37	0.02	12.72			0.22		0.01	0.06	0.5	4.57	3.96	-	0.62		427	10	41.6	11.7	131	6.7		13.7	42.7	3.55556	19.5522		770.105
			XLHY-7	75.79	0.07	13.11			1.04		0.03	0.03	0.65	3.56	5.16	-	0.98		698	7.3	83.1	8.8	135	6.8		38.5	95.6164	9.44318	19.8529		774.95
Dasongpo ore block in Xiaolonghe Sn deposit	Xiaolonghe granite	Biotite granite	DSP-1	76.09	0.06	12.81			1.02		0.02	0.02	0.63	4.21	4.35	-	0.8		726	12.7	67.3	11.9	114	6.3		10.9	57.1654	5.65546	18.0952		757.607
			DSP-2	76.22	0.03	12.7			0.83		0.01	0.01	0.53	4	4.44	-	0.79		712	10.6	50.4	8.8	105	6.2		12.8	67.1698	5.72727	16.9355		754.01
			DSP-3	73.79	0.04	12.49			0.89		0.01	0.01	0.45	3.92	4.58	-	4.01		701	8.8	40.8	11.2	107	7.7		7	79.6591	3.64286	13.8961		754.305
			DSP-4	75.64	0.06	13.14			0.9		0.01	0.05	0.56	3.97	4.77	0.01	0.79		735	7.9	48.2	9.9	100	6.6		8.6	93.038	4.86869	15.1515		749.376
			DSP-5	75.58	0.12	12.53			1.58		0.03	0.08	0.79	3.72	4.79	-	0.81		529	14	41.5	4.5	171	8.1		21	37.7857	9.22222	21.1111		789.855
			DSP-6	75.44	0.1	12.74			1.43		0.02	0.07	0.75	3.73	4.94	-	0.82		516	16.1	37.9	4.4	160	7.2		20.2	32.0497	8.61364	22.2222		784.623
			DSP-7	75.79	0.1	12.58			1.28		0.02	0.07	0.6	3.35	5.26	-	0.93		401	13.1	38.3	4.3	152	6.3		11.4	30.6107	8.90698	24.127		784.291
			DSP-8	76.15	0.1	12.27			1.44		0.02	0.06	0.69	3.94	5.12	0.01	1.02		503	10.9	39.5	3.8	141	5.9		13.3	46.1468	10.3947	23.8983		766.598
	central Thailand and Burma	Rayong granite	121	71.58	0.35	14.03			0.19	2.63	0.05	0.9	1.55	2.67	4.81	0.16	0.93		279	123			144			15	2.26829			0.0722433	784.24	Schwart et al., 1995
			n=25	72.6	0.31	13.8				2.08	0.05	0.66	1.26	2.74	5	0.16	0.83		351	81	15		146			10	4.33333				786.968	Lehmann and Mahawat, 1989
		Border range granites	n=20	73.42	0.25	13.53				1.88	0.06	0.35	1	2.92	5.11	0.09	0.88		442	65	24		149			14	6.8				788.4
	Tanjungpandan Batholith/biotite granite suite	main-phase granite	n=19	75.54	0.18	12.2				1.79	0.04	0.13	1.29	2.46	5.23	0.03	0.65		355	72	15		165		12	3	4.93056				791.102	Lehmann and Harmanto, 1990
		megacrystic microgranite	n=19	76.1	0.14	12.06				1.63	0.04	0.07	1.05	2.51	5.2	0.02	0.73		399	48	17		145		14	4	8.3125				782.748
		microgranite	n=5	76	0.07	12.61				1.05	0.03	0.02	1.05	3.01	5.1	0.01	0.67		408	26	19		81		19	2	15.6923				732.604
		aplite	n=1	75.84	0.09	12.63				0.71	0.02	0.04	0.75	2.15	6.72	0.04	0.74		318	102	6		53		2	2	3.11765				702.002
		Biotite granite/granodiorite	324	75.03	0.81	12.7			0.07	1.86	0.04	0.23	1.3	2.67	5.27	0.04	0.51		355	79			142		<7	<3	4.49367			0.0376344	776.874	Schwart et al., 1995
Pilok Sn-W deposit	Pilok aplogranite		21	77.45	0.02	12.35			0.58		0.11	0	0.38	4.07	3.52	0.02	0.71	99.36	575	18	35	21	69		689	18	31.9444	1.66667			728.591	Lehmann et al., 1994
			24	73.18	0.2	14.26			1.45		0.04	0.17	0.52	2.98	5.65	0.15	0.9	99.59	534	47	33	6	117		<5	27	11.3617	5.5			773.348
			28	76.77	0.07	12.46			0.9		0.05	0.04	0.32	3.4	4.54	0.01	0.75	99.48	464	35	33	12	83		21	36	13.2571	2.75			744.202
			31	76.46	0.06	12.81			0.74		0.03	0	0.48	3.42	4.42	0.01	0.85	99.41	443	19	39	9	40		31	7	23.3158	4.33333			689.311
			32	76.1	0.02	13.19			0.48		0.04	0	0.39	3.82	4.64	0.01	0.66	99.49	692	8	51	12	93		16	15	86.5	4.25			750.009
			33	75.97	0.02	13.22			0.61		0.09	0	0.37	3.99	4.43	0.01	0.59	99.46	688	9	41	22	56		33	9	76.4444	1.86364			710.342
			34	76.55	0.01	12.77			0.63		0.23	0	0.4	4.14	4.18	0	0.64	99.67	678	7	38	11	125		205	15	96.8571	3.45455			771.684
			35	76.11	0.02	13.31			0.64		0.07	0	0.42	3.88	4.44	0.01	0.65	99.66	762	9	33	9	42		<5	21	84.6667	3.66667			690.318
			36	77.67	0.01	12.14			0.16		0.06	0	0.38	3.76	4.85	0.01	0.55	99.71	795	17	43	9	31		2325	10	46.7647	4.77778			662.374
			37	75.76	0.08	12.98			0.92		0.06	0.04	0.43	3.43	4.58	0.02	0.1	99.42	526	21	55	10	78		90	2	25.0476	5.5			739.481
			39	74.57	0.24	13.18			1.91		0.06	0.43	0.55	3.36	4.41	0.06	0.71	99.58	395	56	23	<5	116		13	44	7.05357				772.368
			40	74.84	0.2	12.81			2.09		0.08	0.47	0.36	3.32	4.29	0.06	0.88	99.5	335	56	19	5	102		<5	13	5.98214	3.8			763.972
			41	74.94	0.19	12.82			1.66		0.08	0.23	0.7	3.07	5.04	0.05	0.78	99.67	492	54	20	8	119		<5	23	9.11111	2.5			768.938
			42	73.82	0.2	13.19			1.64		0.08	0.26	0.76	3.52	5.25	0.05	0.79	99.65	502	52	24	<5	131		<5	23	9.65385				769.419
			43	76.22	0.04	13.1			0.67		0.04	0	0.24	3.77	4.69	0.02	0.8	99.7	611	12	32	14	60		<5	2	50.9167	2.28571			717.274
			44	76.79	0.05	12.72			0.66		0.03	0	0.22	3.83	4.44	0.01	0.78	99.62	580	17	42	8	45		23	6	34.1176	5.25			695.64
			45	75.17	0.1	13.2			1.27		0.06	0.09	0.61	3.42	4.66	0.03	0.85	99.58	518	41	34	8	109		24	18	12.6341	4.25			764.327
			46	72.7	0.05	15.26			0.58		0.07	0.11	0.17	3.74	5.79	0.13	0.86	99.55	799	31	59	32	6		78	80	25.7742	1.84375			569.501
			52	77.87	0	12.22			0.02		0.01	0	0.03	4	4.77	0.02	0.63	99.65	571	15	11	5	69		45	2	38.0667	2.2			723.05
			53	77.78	0.01	12.43			0.16		0.01	0	0.05	4.39	3.91	0.01	0.59	99.45	480	15	21	<5	47		72	8	32				697.407
			56	76.58	0.03	12.73			0.49		0.08	0	0.49	3.96	4.16	0.01	0.84	99.52	525	17	54	<5	86		<5	25	30.8824				742.171
			58	76.32	0.07	12.76			0.82		0.03	0.02	0.38	3.44	4.63	0.01	0.8	99.38	445	24	27	<5	66		15	2	18.5417				725.577
			59	72.36	0.34	13.7			2.36		0.08	0.48	1.14	2.89	5.36	0.13	0.73	99.67	491	88	25	<5	190		<5	16	5.57955				805.934
			60	73.92	0.19	13.55			1.2		0.04	0.27	0.76	3.27	5.27	0.08	0.9	99.59	522	71	24	<5	110		<5	13	7.35211				760.701
			63	72.54	0.29	13.76			2.12		0.06	0.5	1.12	2.65	5.02	0.11	1.25	99.54	448	84	21	<5	160		<5	15	5.33333				798.424
			64	72.2	0.32	13.94			2.25		0.06	0.58	1.29	2.77	5.33	0.12	0.63	99.61	467	87	22	10	173		11	17	5.36782	2.2			798.67
			65	73.02	0.28	13.53			2.03		0.06	0.42	1.22	2.99	4.68	0.1	1.15	99.58	368	88	29	7	171		42	18	4.18182	4.14286			800.089
			66	73.11	0.2	14.37			1.39		0.04	0.21	0.83	2.7	5.63	0.14	0.9	99.62	555	44	33	5	109		5	34	12.6136	6.6			767.504
			67	72.91	0.2	14.35			1.39		0.04	0.23	0.82	2.78	5.55	0.16	0.95	99.48	589	47	33	10	114		<5	40	12.5319	3.3			770.843
			70	74.54	0.03	14.71			0.46		0.06	0	0.2	4.48	4.01	0.12	0.89	99.6	659	21	87	41	8		112	32	31.381	2.12195			587.972
			75	75.58	0.03	13.77			0.49		0.09	0	0.23	3.58	4.46	0.16	0.98	99.49	771	19	95	59	16		437	150	40.5789	1.61017			632.202
			76	73.87	0.02	14.85			0.5		0.07	0	0.22	4.82	4.17	0.09	0.7	99.45	692	11	87	44	24		51	26	62.9091	1.97727			651.679
	Pin Yok		7711-0308-1	73.83	0.36	12.88	2.32				0.05	0.82	0.97	2.54	5.27	0.11	0.76	99.91	429	65	15	2.1	153	3.2		21	6.6	7.14286	47.8125		790.388	Wu and Ishihara, 1994
	Khara khiri		7711-0202-3	71.31	0.37	13.99	2.27				0.05	0.71	1.35	3.08	5.4	0.15	0.98	99.66	401	79	14	3	166	4.2		35	5.07595	4.66667	39.5238		788.274
			7711-0203-1*	71.77	0.34	13.81			0.71	1.47	0.05	0.61	1.4	3.14	5.02	0.15		99.32	456	60	16	3.8	140	5.3		17	7.6	4.21053	26.4151	0.482993	775.511
	Songkhla		7711-2805-3*	70.84	0.35	14.53			0.39	1.83	0.05	0.88	1.61	2.54	5.4	0.13		99.38	361	116	18	2.3	186	5.5		5	3.11207	7.82609	33.8182	0.213115	805.576
			7711-2805-1	74.21	0.19	13.38	1.87				0.03	0.28	0.65	3.02	4.99	0.23	0.79	99.64	408	30	13	3	99	3.6		11	13.6	4.33333	27.5		758.054
			7711-2804-2	73.6	0.2	13.31	1.75				0.03	0.28	0.67	2.87	5.28	0.19	0.92	99.1	473	28	17	3	109	3.9		14	16.8929	5.66667	27.9487		764.683
			7710-2502-1	74.99	0.09	13.35	1.36				0.05	0.11	0.48	3.34	4.86	0.2	0.9	99.73	802	11	17	8	66	2.6		19	72.9091	2.125	25.3846		725.628
			7710-2501-2*	73.73	0.05	14.91			0.52	0.61	0.06	0.11	0.41	3.63	4.55	0.28		99.44	1009	2	30	19.5	35	1.6		15	504.5	1.53846	21.875	0.852459	685.318
			7710-2501-1	74.05	0.05	13.73	1.26				0.04	0.08	0.4	3.52	5.03	0.22	0.7	99.08	977	2	19	9.7	48	1.6		15	488.5	1.95876	30		700.711
		Biotite granite/granodiorite	70	74.39	0.2	13.21			0.26	1.43	0.05	0.29	0.86	3.21	5.08	0.18	0.44		496	38			94		7	21	13.0526			0.181818	746.64	Schwart et al., 1995
	Ko Phuket		7711-3001-2	73.2	0.31	13.15	2.28				0.03	0.38	1.54	2.47	5.42	0.06	0.73	99.57	394	73	18	2.2	221	7.4		13	5.39726	8.18182	29.8649		815.975	Wu and Ishihara, 1994
			7711-3004-1*	71.76	0.27	14.27			0.76	1.37	0.06	0.51	1.02	2.61	5.92	0.11		99.25	627	44	34	5.1	189	6.4		37	14.25	6.66667	29.5312	0.554745	809.828
			DMR-1	73.18	0.47	13.05	2.58				0.03	0.67	1.73	2.2	5.16	0.09	0.6	99.76	301	94	16	1.5	222	6.9		6	3.20213	10.6667	32.1739		818.759
			DMR-4	70.41	0.61	13.33	3.86				0.06	1.06	1.76	2.23	4.84	0.15	0.76	99.07	387	97	22	2.5	253	8.9		9	3.98969	8.8	28.427		832.229
			DMR-7	72.03	0.34	13.6	2.32				0.04	0.48	1.36	2.59	5.98	0.07	0.6	99.41	456	91	22	3	173	7.3		16	5.01099	7.33333	23.6986		791.573
	Khao Luang		7711-2304-2*	72.59	0.25	14.57			0.64	1.33	0.06	0.55	0.93	3.17	4.44	0.21		99.6	565	44	15	3.8	112	3.1			12.8409	3.94737	36.129	0.481203	772.832
			7711-2304-4	74.54	0.02	14.06	0.79				0.05	0.01	0.42	4.65	3.68	0.38	0.65	99.25	817	5	34	16.9	25	1.9			163.4	2.01183	13.1579		653.97
			7711-2301-2	73.66	0.05	14.52	1.15				0.04	0.14	0.44	4.08	4.31	0.19	0.64	99.21	395	13	4	1.8	31	2.1			30.3846	2.22222	14.7619		671.462
	Yod Nam Mine		77-T10-4*	72.2	0.35	13.74			0.8	1.15	0.02	0.64	1.5	3.38	4.8	0.14		99.48	337	119	24	4	222	8.4			2.83193	6	26.4286	0.695652	813.217
			7711-1402-3*	71.89	0.3	14.43			0.84	1.54	0.06	0.51	1.02	2.96	5.13	0.19		99.53	404	57	24	4.1	195	6.5			7.08772	5.85366	30	0.545455	815.95
			77-T11-9	72.74	0.27	13.66	1.48				0.02	0.35	0.77	3.38	5.38	0.18	0.99	99.22	556	30	27	4.1	189	7			18.5333	6.58537	27		804.273
			77-T11-11*	72.62	0.25	14.15			0.35	1.47	0.03	0.26	0.7	3.08	5.67	0.19		99.59	635	21	26	4.6	180	7.3			30.2381	5.65217	24.6575	0.238095	805.687
			77-T10-2	74.23	0.14	13.74	1.49				0.04	0.17	0.66	3.19	4.16	0.31	1.27	99.4	635	10	25	5.8	87	4.2		27	63.5	4.31034	20.7143		754.571
			77-T10-6*	72.54	0.12	15.04			0.32	1.01	0.04	0.2	0.6	3.6	5.08	0.29		99.65	693	12	26	5	85	2.7		25	57.75	5.2	31.4815	0.316832	746.331
			77-T10-3*	73.43	0.04	15.02			0.36	0.54	0.03	0.16	0.51	3.92	4.48	0.27		99.64	623	10	20	4.4	47	1.3		23	62.3	4.54545	36.1538	0.666667	703.208
	Belinyu	Biotite granite/granodiorite	310	70.95	0.39	14.13			0.11	2.69	0.07	0.85	2.12	2.78	5.09	0.11	0.52		309	128			184		10	10	2.41406			0.0408922	793.055	Schwart et al., 1995
	Pemali		311	76.49	0.13	12.02	1.32				0.04	0.06	0.74	2.84	5	0.02	0.76		551	59			136		28	15	9.33898				779.274
	Permisan		321	74.21	0.19	13.2			0.06	1.93	0.06	0.24	1.06	3.05	5.03	0.07	0.66		321	60			132		<7	<3	5.35			0.0310881	774.334
	Pading		322	72.62	0.28	13.55			0.1	2.26	0.05	0.49	0.196	2.7	5.14	0.06	0.47		284	145			178		<7	<3	1.95862			0.0442478	819.201
	Toboali	biotite granite and hornblende-bitite granite/granodiorite	323	74.91	0.18	12.77			0.07	1.9	0.03	0.29	1.36	2.82	5.09	0.04	0.44		324	75			126		<7	<3	4.32			0.0368421	766.116
	Menum-bing	Biotite granite/granodiorite	320	72.85	0.25	13.46			0.1	2.17	0.05	0.37	1.37	3.18	5.06	0.06	1.02		510	61			156		9	22	8.36066			0.0460829	782.375
	Singkep-Dabo		300	76.26	0.12	12.81			0.04	1.17	0.05	0.22	0.81	3.47	4.47	0.03	0.46		376	48			81		9	21	7.83333			0.034188	736.271
	BuBu(Bintang)		42	73.32	0.3	13.23			0.22	1.94	0.03	0.3	1.05	3.03	5.43	0.11	0.95		435	52			203		11	17	8.36538			0.113402	808.103
	Dindings		41	75.96	0.23	12.89			0.17	1.68	0.05	0.27	0.94	2.99	5.1	0.06	0.84		382	31			134		13	19	12.3226			0.10119	776.402
	Bujang-Melaka		40	71.33	0.33	14.19	2.3				0.04	0.35	1.36	3.13	5.39	0.12	0.91		453	73			192		17	25	6.20548				802.19
	Berenang		32	73.35	0.27	13.65			0.03	1.72	0.05	0.5	1.2	2.7	5.42	0.09	0.57		452	61			106		<7	18	7.40984			0.0174419	757.358
	UluKali		31	73.29	0.36	12.95			0.49	1.73	0.03	0.39	1.34	2.97	5.19	0.09	0.8		416	66			213			21	6.30303			0.283237	808.958
	Kulim-Bongsu		50	71.75	0.39	13.76			0.21	2.19	0.06	0.71	1.66	2.99	5.24	0.14	0.52		355	155			175		<7	14	2.29032			0.0958904	789.64
	Kulim-Jelutong		51	74.47	0.19	13.76			0.26	1.65	0.09	0.32	0.7	3.26	4.84	0.11	0.6		400	52			92		7	24	7.69231			0.157576	751.567
	Doi Saket		192	71.92	0.23	14.1			0.52	1.29	0.03	0.62	1.06	3.02	5.13	0.33	0.41		384	61							6.29508			0.403101
	Fang-Huai		191	73.66	0.22	13.4			0.22	1.39	0.06	0.66	1.1	3.09	5.26	0.13	0.45		344	59			103		<7	24	5.83051			0.158273	751.062
	Hup Kapong		120	72.98	0.35	13.39			0.17	2.09	0.05	0.69	1.44	2.47	5.21	0.12	0.56		334	90							3.71111			0.0813397
	Satun		64	75.05	0.27	12.43			0.32	1.61	0.06	0.43	1.2	2.75	5.3	0.07	0.21		330	98			140		<7	6	3.36735			0.198758	773.964
	CR	Biotite granite	CR-1	69.44	0.557	14.5	4.03			3.62619	0.045	1.07	2.83	2.41	3.58	0.136	1.6	100.198	193	342	14.4	1.46	181	5.35	1.07	1.24	0.564327	9.86301	33.8318		801.358	Liu et al., 2020
			CR-2	67.9	0.492	14.88	3.87			3.48223	0.051	0.91	3.02	2.86	3.84	0.195	2.04	100.058	224	359	16.4	1.37	212	5.99	1.33	2.12	0.623955	11.9708	35.3923		805.215
	SK		SK-10(1)	76.35	0.141	13.34	0.74			0.665852	0.036	0.15	0.59	3.73	4.56	0.047	0.72	100.404	794	17.9	16.9	4.19	65.6	3.16	7.33	23.5	44.3575	4.03341	20.7595		722.066
	PK	Two-mica granite	PK-1	73.91	0.345	13.76	1.36			1.22373	0.016	0.47	0.7	2.31	5.89	0.148	1.25	100.159	568	69.9	25.5	2.51	187	5.53	3.81	7.35	8.12589	10.1594	33.8156		816.587
		Biotite granite	PK-2	68.23	0.698	13.8	3.36			3.02333	0.043	2.34	2.76	1.93	5.39	0.244	0.98	99.775	403	284	19.7	1.74	280	8.12	7.08	2.9	1.41901	11.3218	34.4828		824.078
*If the name of deposit is not reported, only the name of the mineralizing pluton is shown.
**In this column, n=XX refers to the whole-rock geochemical composition and is the average of XX measurements
Fe2O3T and FeOT represents the total Fe content is expressed as Fe2O3 and FeO respectively.
References
Chen, X.C., Hu, R.Z., Bi, X.W., Zhong, H., Lan, J.B., Zhao, C.H., and Zhu, J.J., 2015, Petrogenesis of metaluminous A-type granitoids in the Tengchong–Lianghe tin belt of southwestern China: Evidences from zircon U–Pb ages and Hf–O isotopes, and whole-rock Sr–Nd isotopes: Lithos, v. 212-215, p. 93-110.
Htun, K.T., Yonezu, K., Myint, A.Z., Tindell, T., and Watanabe, K., 2019, Petrogenesis, ore mineralogy, and fluid inclusion studies of the Tagu Sn–W deposit, Myeik, southern Myanmar: minerals, v.9, p. 654
Jiang, H., Li, W.Q., Jiang, S.Y., Wang, H., and Wei, X.P., 2017Geochronological, geochemical and Sr-Nd-Hf isotopic constraints on the petrogenesis of Late Cretaceous A-type granites from the Sibumasu Block, Southern Myanmar, SE Asia: Lithos, v. 268-271, p. 32-47.
Lehmann, B., and Harmanto, 1990, Large-scale tin depletion in the Tanjungpandan tin granite, Belitung, Island, Indonesia: Economic Geology, v. 85, p. 99-111.
Lehmann, B., and Mahawat, C., 1989, Metallogeny of tin in central Thailand: A genetic concept: Geology, v. 17, p. 426-429.
Lehmann, B., Jungyusuk, N., Khositanont, S., Hohndorf, A., and Kuroda, Y., 1994, The tin-tungsten ore system of Pilok, Thailand: Journal of Southeast Asian Earth Sciences, v. 10, p. 51-63.
Li, H., Myint, A.Z., Yonezu, K., Watanabe, K., Algeo, T.J., Wu, J.H., 2018, Geochemistry and U–Pb geochronology of the Wagone and Hermyingyi Atype granites, southern Myanmar: Implications for tectonic setting, magma evolution and Sn–W mineralization: Ore Geology Reviews, v. 95, p. 575-592.
Liu, L., Hu, R.Z., Zhong, H., Yang, J.H., Kang, L.F., Zhang, X.C., Fu, Y.Z., Mao, W., and Tang, Y.W., 2020, Petrogenesis of multistage S-type granites from the Malay Peninsula in the Southeast Asian tin belt and their relationship to Tethyan evolution: Gondwana Research, v.84, p. 20-37.
Schwartz, M.O., Rajah, S.S., Askury, A.K., Putthapiban, P., and Djaswadi, S., 1995, The Southeast Asian Tin Belt: Earth-Science Reviews, v. 38, p. 95-293.
Wu, C., and Ishihara, S., 1994, REE geochemistry of the Southern Thailand granites: Journal of Southeast Asian Earth Sciences, v. 10, p. 81-94.

## Sheet: 1D Youjiang Sn belt
Table S1D Geochemical data of the Sn-related granites in the Youjiang Sn belt.
Deposit	Rock type	Sample number	SiO2	TiO2	Al2O3	Fe2O3T	FeOT	Fe2O3	FeO	MnO	MgO	CaO	Na2O	K2O	P2O5	LOI	Total	Rb	Sr	Nb	Ta	Zr	Hf	W	Sn	Rb/Sr	Nb/Ta	Zr/Hf	Tzr(°C)	Fe2O3/FeO	Reference
Gejiu Sn deposit	porphyritic granite	Cyb0707002	73.01	0.28	13.96	2.03				0.05	0.5	1.32	3.2	4.91	0.18	0.76	100.21	390.79	171.58	26.35	5.05	173.76	4.9			2.2776	5.21782	35.4612	798.52		Cheng and Mao, 2010
		Cyb0707003	71.3	0.27	13.94	1.93				0.06	0.51	1.68	2.21	5.48	0.16	1.98	99.52	556.93	180.1	28.43	9.23	169.25	4.94			3.09234	3.08017	34.2611	798.907
		Cyb0707006	74.79	0.12	13.18	1.01				0.03	0.2	0.87	3.44	5.03	0.1	1.46	100.23	543.03	60.98	43.78	11.81	100.55	3.84			8.90505	3.70703	26.1849	750.64
		Cyb0707007	75.33	0.12	13.59	1.26				0.08	0.21	0.75	3.58	4.76	0.11	0.95	100.72	619.72	49.58	48.24	15.99	85.25	3.4			12.4994	3.01689	25.0735	742.033
		Cyb0707008	74.95	0.11	12.78	1.41				0.04	0.14	0.93	3.71	4.4	0.06	1.1	99.63	523.83	71.27	37.97	8.85	132.23	5.07			7.34994	4.2904	26.0809	772.196
		Cyb0707011	76.49	0.09	12.46	1.29				0.04	0.12	0.85	3.27	4.76	0.07	0.77	100.22	592.64	40.71	42.25	7.05	112.99	4.54			14.5576	5.99291	24.8877	761.672
		D007	76.3	0.03	12.47	0.57				0.02	0.07	0.6	3.45	4.76	0.05	0.77	99.1	763.99	30.76	53.86	19.42	78.47	5.62			24.8371	2.77343	13.9626	733.477
		D008	75.46	0.09	12.36	1.49				0.03	0.25	0.69	2.78	4.52	0.07	1.35	99.1	891.19	32.64	38.1	7.52	128.71	5.74			27.3036	5.06649	22.4233	783.582
	porphyritic granite	CYB0807056	70.34	0.44	14.82	2.35				0.05	0.78	1.8	3.09	5.24	0.15	0.71	99.75	229	349	19.4	1.46	228	5.71			0.65616	13.2877	39.9299
		CYB0807057	63.83	0.65	16.65	3.82				0.07	1.44	3.28	3.29	5.83	0.26	0.57	99.67	226	805	19.4	1.26	327	7.36			0.280745	15.3968	44.4293
		CYB0807058	70.84	0.35	14.76	2.07				0.05	0.68	1.78	3.17	5.2	0.14	0.73	99.76	285	368	14.4	0.89	234	5.95			0.774457	16.1798	39.3277
		CYB0807059	63.4	0.68	16.1	3.96				0.08	1.48	3.28	3.35	5.55	0.28	1.51	99.66	260	738	21.9	1.47	383	8.1			0.352304	14.898	47.284
		CYB0807060	67.72	0.53	15.21	2.99				0.05	1.1	2.48	3.15	5.24	0.2	1.03	99.7	236	517	15.1	0.92	217	4.62			0.45648	16.413	46.9697
		CYB0807061	62.98	0.75	16.4	4.35				0.07	1.62	3.52	3.18	5.48	0.31	1	99.66	227	741	22.1	1.27	336	6.62			0.306343	17.4016	50.7553
		CYB0807062	59.87	0.91	16.85	5.65				0.09	2.05	3.73	3.21	6.17	0.38	0.7	99.61	272	747	25.8	1.19	419	6.62			0.364123	21.6807	63.2931
		CYB0807063	65.89	0.65	15.48	3.95				0.08	1.38	3.11	3.36	4.81	0.25	0.74	99.69	249	555	23.5	1.04	295	4.69			0.448649	22.5962	62.8998
		CYB0807064	67.83	0.64	14.68	3.85				0.07	1.37	2.4	3.3	4.31	0.25	1	99.71	296	347	20.6	1.35	350	8.03			0.853026	15.2593	43.5866
		CYB0807065	64.91	0.75	16.1	4.16				0.07	1.56	3.2	3.14	4.93	0.31	0.58	99.69	241	730	20.6	1.5	336	8.04			0.330137	13.7333	41.791
		CYB0807072	74.94	0.14	14.75	0.23				0.01	0.29	0.41	3.6	4.62	0.18	0.71	99.87	321	96	22.7	4.81	76.6	2.5			3.34375	4.71933	30.64
		CYB0807079	61.95	0.69	15.93	3.93				0.06	1.5	3.04	5.43	5.98	0.3	0.84	99.66	247	729	18.7	1.26	325	7.7			0.33882	14.8413	42.2078
		CYB0707001	72.08	0.32	14.38	1.83				0.06	0.55	1.29	3.15	5.08	0.16	0.85	99.75	313	134	25.9	2.58	155	2.75			2.33582	10.0388	56.3636	789.983
		CYB0807031	71.11	0.43	14.11	2.42				0.04	0.72	1.75	2.97	5.3	0.17	0.74	99.74	314	188	30.2	2.39	157	3.09			1.67021	12.636	50.8091	782.45
		CYB0807032	71.18	0.42	14.07	2.63				0.05	0.77	1.74	3.04	4.8	0.17	0.86	99.75	346	173	31.5	3.82	218	5.94			2	8.24607	36.7003	815.398
		CYB0807033	67.26	0.56	13.78	3.35				0.07	1.33	4.55	2.98	3.89	0.27	1.57	99.59	190	395	33.7	3.19	252	6.59			0.481013	10.5643	38.2398	787.946
		CYB0807034	74.65	0.17	13.27	1.39				0.06	0.28	1.14	3.44	4.58	0.06	0.74	99.78	375	61.8	38.9	6.25	130	4.59			6.06796	6.224	28.3224	772.576
		CYB0807035	73.26	0.31	13.38	2.03				0.06	0.52	1.44	3.06	4.77	0.12	0.82	99.77	324	108	35.3	4.52	201	5.7			3	7.80973	35.2632	809.66
		CYB0807036	73.54	0.26	13.35	1.79				0.06	0.45	1.12	3.17	4.93	0.1	0.99	99.76	344	77.9	39.5	6.2	173	5.63			4.41592	6.37097	30.7282	798.016
		CYB0807037	73.99	0.23	13.39	1.59				0.04	0.39	1.22	3.2	4.69	0.09	0.94	99.78	338	81.3	32.5	3.49	147	4.33			4.15744	9.31232	33.9492	784.612
		CYB0807038	73.67	0.22	13.65	1.46				0.05	0.41	1.1	3.11	4.88	0.11	1.12	99.78	495	94.1	35.4	10.4	80.3	2.94			5.26036	3.40385	27.3129	737.098
		CYB0807039	73.82	0.26	13.24	1.64				0.04	0.44	1.36	2.8	4.97	0.1	1.14	99.8	495	82.9	39.4	5.95	158	5			5.97105	6.62185	31.6	790.846
	equigranular granite	CYB0807020	73.51	0.32	13.6	1.46				0.03	0.59	1.56	2.88	5.07	0.14	0.61	99.78	450	127	32.9	3.55	185	4.55			3.54331	9.26761	40.6593	801.443
		CYB0807021	77.25	0.05	12.3	<0.01				0.01	0.27	0.31	0.39	8.64	0.02	0.87	99.82	760	58.9	38.1	8.62	92.3	4.3			12.9032	4.41995	21.4651	756.833
		CYB0807022	77.18	0.05	12.63	<0.01				0.01	0.37	0.14	0.91	7.73	0.02	1.04	99.82	695	83.8	42.3	7.9	84.8	3.33			8.29356	5.35443	25.4655	755.097
		CYB0807023	77.87	0.05	11.94	<0.01				0.01	0.34	0.77	2.6	5.05	0.02	1.37	99.82	441	62.4	40.9	9.48	76.6	4.12			7.06731	4.31435	18.5922	735.174
		CYB0807024	77.2	0.05	12.05	<0.01				0.01	0.18	0.47	0.84	8.58	0.02	0.73	99.82	713	85.5	37.7	7.47	84.6	3.24			8.33918	5.04685	26.1111	740.211
		CYB0807025	76.94	0.05	12.85	<0.01				0.01	0.2	0.46	2.5	6.33	0.02	0.75	99.81	474	67.5	49.3	12.1	85.4	4.99			7.02222	4.07438	17.1142	743.324
		CYB0807026	76.86	0.06	12.99	<0.01				0.01	0.2	0.73	3.13	5.09	0.02	1	99.85	501	69.8	40.7	10.9	91.9	5.29			7.17765	3.73394	17.3724	748.712
		CYB0807027	77.25	0.05	12.75	<0.01				0	0.13	0.36	2.65	6.37	0.02	0.53	99.82	565	59.3	42.9	10.6	93.8	5.27			9.52782	4.04717	17.7989	749.491
		CYB0807028	76.82	0.06	12.6	<0.01				0.01	0.23	0.34	1	8.28	0.02	0.78	99.82	720	103	43.1	11.5	91.9	5.72			6.99029	3.74783	16.0664	752.438
		CYB0807029	75.51	0.06	12.96	<0.01				0.01	0.39	1.04	1.43	6.89	0.02	1.77	99.81	632	133	41.6	11.1	85.3	4.95			4.75188	3.74775	17.2323	744.502
	phrphyritic granite	CYB0807001	75.8	0.18	12.83	0.25				0.02	0.33	1.82	2.5	5.18	0.07	0.82	99.8	309	99.4	30.8	5.52	142	4.69			3.10865	5.57971	30.2772	775.26
		CYB0807002	73.41	0.3	13.74	1.32				0.03	0.47	1.56	2.87	5.37	0.13	0.58	99.78	335	123	30.2	3.4	181	4.98			2.72358	8.88235	36.3454	797.759
		CYB0807005	73.16	0.31	13.61	1.56				0.04	0.47	1.34	2.82	5.77	0.15	0.55	99.77	348	118	29.2	3.12	183	4.63			2.94915	9.35897	39.5248	797.967
		CYB0807006	75.59	0.05	12.5	<0.01				0.02	0.47	1.49	1.36	6.29	0.02	2.28	99.81	331	124	31.2	4.33	204	5			2.66935	7.20554	40.8	816.474
		CYB0808093	76.78	0.1	13	0.61				0.01	0.17	0.7	3.15	4.64	0.03	0.66	99.85	457	105	33.1	3.81	196	4.9			4.35238	8.68766	40	818.706
		CYB0808094	75.55	0.15	12.65	0.36				0.02	0.22	1.04	2.81	5.89	0.06	1.02	99.78	548	123	40.7	8.06	84.1	4.12			4.45528	5.04963	20.4126	731.811
		CYB0808095	76.02	0.17	12.88	0.56				0.02	0.33	0.95	2.32	5.77	0.11	0.71	99.84	432	39.9	38.4	4.5	102	3.54			10.8271	8.53333	28.8136	757.873
		CYB0808096	75.72	0.13	13.09	0.82				0.02	0.22	0.71	2.93	5.48	0.05	0.65	99.81	469	119	37.2	5.66	111	3.39			3.94118	6.57244	32.7434	763.853
		CYB0808097	76.18	0.1	13	0.61				0.02	0.15	0.77	3.48	4.92	0.04	0.54	99.81	450	183	64.1	10.1	113	3.04			2.45902	6.34653	37.1711	761.64
		CYB0808099	75.08	0.13	13.14	0.86				0.03	0.54	1	3.35	4.83	0.25	0.6	99.8	514	57.9	36.2	6.13	90.3	3.63			8.87737	5.90538	24.876	742.466
		CYB0707012	74.84	0.21	13.07	0.58				0.02	0.34	1.7	3	5.34	0.09	0.59	99.78	429	26.6	33.3	5.13	87.4	3.82			16.1278	6.49123	22.8796	730.054
		CYB0707013	74.76	0.24	13.08	1.22				0.02	0.4	1.22	3.3	4.75	0.1	0.69	99.78	544	178	59.1	16.8	92	4.23			3.05618	3.51786	21.7494	741.993
		CYB0807014	73.86	0.21	13.47	1.28				0.02	0.36	1.1	2.96	5.75	0.12	0.64	99.78	396	32.8	31.3	5.4	96	3.96			12.0732	5.7963	24.2424	744.829
		CYB0807015	74.14	0.29	13.19	1.57				0.04	0.48	1.4	3.08	4.8	0.13	0.66	99.78	533	68	37.8	7.54	97.8	3.89			7.83824	5.01326	25.1414	747.191
		CYB0707016	73.94	0.26	13.81	1.24				0.02	0.46	1.19	3.07	5.05	0.12	0.64	99.81	359	155	33.1	5.94	139	4.67			2.31613	5.57239	29.7645	781.047
		CYB0807003	73.82	0.31	13.4	1.22				0.02	0.47	1.42	2.78	5.46	0.14	0.73	99.77	370	111	39.9	8.54	109	3.9			3.33333	4.67213	27.9487	755.011
		CYB0807004	74.2	0.31	14.16	1.4				0.03	0.51	1.3	2.6	4.54	0.15	0.68	99.87	384	112	25.4	4.73	70	2.37			3.42857	5.36998	29.5359	735.431
		CYB0808098	75.86	0.1	13.25	0.51				0.01	0.19	0.87	2.43	5.74	0.04	0.81	99.82	299	136	31.8	4.78	166	4.61			2.19853	6.65272	36.0087	802.047
		CYB0808100	75.86	0.14	13.01	1.28				0.01	0.25	0.52	2.36	5.55	0.06	0.79	99.82	365	110	31.3	3.33	154	3.79			3.31818	9.3994	40.6332	802.092
Dachang Sn deposit		16LM14-1	73.73	0.09	14.41	1.56				0.11	0.19	0.86	3.59	4.69	0.28		101.6	429	45.9	39.5	10.3	59	2.3			9.34641	3.83495	25.6522	714.94		Huang et al., 2019
		16LM14-3	74.14	0.1	14.4	1.69				0.11	0.21	0.73	3.12	5.12	0.29		102.1	486	35.2	45.7	12.7	55	2.2			13.8068	3.59843	25	713.474
		16LM12-1	73.42	0.08	14.26	1.48				0.09	0.17	0.71	2.95	5.8	0.29		101.5	623	37	45.8	11.2	55	2.2			16.8378	4.08929	25	709.704
		16LM12-2	74.1	0.07	14.07	1.47				0.09	0.1	0.61	3.07	5.3	0.31		101.6	851	20.2	63.3	18.8	41	1.9			42.1287	3.36702	21.5789	691.238
	alkali-feldspar granite	DC04-01	74.07	0.1	14.44	1.44				0.09	0.14	0.49	3	4.21	0.32	0.84283	12.3	1051.28	27.5961	84.4764	28.9607	49.865	2.47455			38.0952	2.91693	20.1511	717.52		Wang et al., 2019
		DC04-03	73.35	0.1	14.6	1.26				0.13	0.12	0.5	3.47	4.7	0.34	0.621398	12.53	1033.16	13.8301	73.5081	23.3843	53.9598	2.587			74.7041	3.14348	20.858	714.63
		DC04-02	73.83	0.11	14.37	1.27				0.07	0.13	0.5	3.32	4.57	0.27	0.763851	10.9	1036.06	16.4859	72.534	21.2771	53.976	2.48653			62.8449	3.40903	21.7073	716.661
		DC04-04	73.74	0.12	14.66	1.31				0.08	0.14	0.49	3.33	4.4	0.25	0.577046	11.72	1065.98	14.9537	73.7777	17.8664	68.9633	3.16991			71.2851	4.12941	21.7556	738.186
		DC04-05	74.39	0.12	14.05	1.32				0.09	0.16	0.57	2.85	4.76	0.3	1.01107	10.59	982.85	20.9204	74.1194	20.8592	55.2809	2.56045			46.9805	3.55333	21.5903	720.436
	Biotite granite		70.8	0.12	14.35			0.16	1.99	0.06	0.09	2.02	3.53	4.24	0.44			788	22.8	72.9	18.2	50.3	2.16			34.5614	4.00549	23.287	690.869	0.080402	Cai 2004b
	Alaskite		71.82	0.04	14.97			0.84	2.43	0.04	0.63	0.5	3.5	3.6	0.18			863	38	59	14.3	26	2.24			22.7105	4.12587	11.6071	669.234	0.345679
			72.44	0.07	14.07			0.04	1.98	0.44	0.04	0.66	3.43	3.8	0.2			508	5	77	25.6	12	2.65			101.6	3.00781	4.5283	614.688	0.020202
	Biotite granite		72.62	0.08	13.93			0.59	1.63	0.05	0.24	1.04	3.13	5.27	0.35			904	29.7	73.7	18.5	48.2	1.94			30.4377	3.98378	24.8454	695.083	0.361963	Cai et al., 2004a
	Alaskite		67.62	0.34	14.86			0.74	2.39	0.15	0.85	2.39	2.35	4.13	0.51			1130	37.7	78	25.2	44.8	1.9			29.9735	3.09524	23.5789	693.091	0.309623
			72.71	0.04	14.29			0.68	2.08	0.07	0.36	0.74	3.6	3.49	0.32			535	21.5	68	44.5	19				24.8837	1.52809		644.161	0.326923
			73.73	0.13	13.86			0.2	0.124	0.07	0.12	1.05	2.33	4.67	0.48			1012	100	94	23.6	93	2.01			10.12	3.98305	46.2687	762.841
	Granite porphyry		75.6	0.27	13.66			1	1.55	0.02	0.55	0.36	2.15	3.98	0.18			1060	116	76	25.2	63.1	2.67			9.13793	3.01587	23.633	746.951	0.645161
			72.58	0.08	14.5			0.55	1.42	0.11	0.22	1.23	2.41	4.52	0.44			552	36	62.5	8.85	127	4.53			15.3333	7.06215	28.0353	788.894	0.387324
			74.26	0.13	13.98			0.5	1.48	0.04	0.4	0.75	2.98	4.7	0.4			1035	1523	83	15	207	2.42			0.67958	5.53333	85.5372	828.181	0.337838
			71.6	0.18	15.12			0.64	1.46	0.07	0.65	1.34	0.31	3.4	0.37			1028	863	150	17	120	2.5			1.19119	8.82353	48	821.092	0.438356
			72.23	0.16	14.76			0.82	0.75	0.03	0.36	0.67	0.14	2.94	0.18			874	135.5	144.5	18	95.5	2.18			6.45018	8.02778	43.8073	814.639
			74	0.09	14.66	1.39				0.097	0.17	0.68	3.57	4.92	0.34		99.917	904	29.7	73.7	18.5	48.2	1.94			30.4377	3.98378	24.8454	701.53		Liang 2008
			74.06	0.094	13.97	1.78				0.12	0.16	0.66	3.26	4.62	0.33		99.054	816	18.6	66.8	17	64.1	2.46			43.871	3.92941	26.0569	726.065
			72.62	0.08	13.93	2.41				0.05	0.24	1.04	3.13	5.27	0.35		99.12	411	50.5	34.9	3.45	165	4.24			8.13861	10.1159	38.9151	793.597
			74.16	0.28	13.1	2.11				0.079	0.45	1.18	2.23	4.92	0.26		98.769	855	34.7	48.7	13.4	65.9	2.17			24.6398	3.63433	30.3687	727.121
			72.58	0.08	14.5	2.128				0.11	0.22	1.23	2.41	4.52	0.44		98.218	552	36	62.5	8.85	127	4.53			15.3333	7.06215	28.0353	788.122
			70.42	0.23	14.74	3.108				0.1	1.12	2.24	2.45	3.58	0.56		98.548	863	38	59	14.3	26	2.24			22.7105	4.12587	11.6071	659.388
			73.28	0.03	15.01			0.08	2.16	0.1	0.49	0.19	2.8	4.23	0.27			411	50.5	34.9	3.45	165	4.24			8.13861	10.1159	38.9151	826.582	0.037037
			73.97	0.13	14.49			1.06		0.13	0.25	2.38	0.08	3.6	0.44			793	56.3	70.7	17.7	51.3	1.85			14.0853	3.99435	27.7297	735.468
	Tourmaline-bearing fine-grained granite	LXG-1	73.83	0.08	14.7	0.734		0.0228889	0.64	0.034	0.158	0.573	3.36	5.29	0.284	0.95		814	30.7	63.8	13.3	33.2	1.37	24.1		26.5147	4.79699	24.2336	676.53	0.0357639	Zhao and Yuan unpublished data
		LXG-2	74.5	0.086	14.41	0.877		0.0214444	0.77	0.033	0.143	0.523	3.03	5.11	0.26	0.93		819	29.7	67.8	15.1	40.5	1.6	26.2		27.5758	4.49007	25.3125	695.203	0.0278499
		LXG-3	74.28	0.103	14.61	0.912		0.0342222	0.79	0.041	0.159	0.555	3.22	4.84	0.256	0.92		777	28.4	71.2	15	42.9	1.69	27.1		27.3592	4.74667	25.3846	699.604	0.0433193
		LXG-4	74.72	0.077	14.63	0.739		0.0167778	0.65	0.031	0.135	0.562	3.04	4.81	0.306	0.95		782	26.1	67.4	15.1	38.4	1.64	26.6		29.9617	4.46358	23.4146	693.951	0.025812
		LXG-5	74.6	0.084	14.48	0.834		0.034	0.72	0.036	0.161	0.568	3.12	4.95	0.274	0.87		786	26.7	65.5	14.1	36.3	1.5	25.6		29.4382	4.64539	24.2	687.268	0.0472222
		LXG-6	74.19	0.098	14.67	1.05		0.205556	0.76	0.044	0.166	0.586	3.26	4.6	0.301	1.02		726	27.5	70.9	15.8	40.2	1.64	24.7		26.4	4.48734	24.5122	696.012	0.270468
	Midium-grained equigranular granite	LXG-7	73.89	0.093	14.81	0.888		0.110222	0.7	0.04	0.146	0.561	3.17	5.19	0.279	0.83		849	26.5	68.1	14.6	45.7	1.81	26.3		32.0377	4.66438	25.2486	702.903	0.15746
		LXG-8	75.99	0.087	13.81	1.27		0.0477778	1.1	0.062	0.148	0.532	2.98	4.11	0.257	0.73		705	11.7	74.6	21.2	53.6	2.05	97.8		60.2564	3.51887	26.1463	722.014	0.0434343
		LXG-9	75.13	0.099	13.95	0.59		0.0344444	0.5	0.041	0.131	0.954	2.76	4.94	0.3	1.1		717	56.9	66.5	20.1	50.5	1.96	64.9		12.6011	3.30846	25.7653	709.044	0.0688889
		LXG-10	74.35	0.093	14.4	0.914		0.0362222	0.79	0.048	0.141	0.721	2.65	5.23	0.267	1.17		776	40	65.6	21.9	51.9	2.03	63.3		19.4	2.99543	25.5665	714.579	0.0458509
		LXG-11	74.51	0.143	13.99	1.36		0.0266667	1.2	0.091	0.211	0.65	3.41	4.46	0.265	0.9		708	12.7	58.5	14.2	69.6	2.31	49.8		55.748	4.11972	30.1299	732.891	0.0222222
		LXG-12	75.37	0.07	14.28	0.845		0.0561111	0.71	0.084	0.116	0.43	3.32	4.39	0.334	0.75		826	6.49	67.6	19.1	25.6	1.07	97.9		127.273	3.53927	23.9252	665.682	0.0790297
		LXG-13	75.13	0.067	13.97	0.583		0.0496667	0.48	0.029	0.098	0.545	3.24	5.51	0.27	0.54		866	46.1	65.6	15.4	34.1	1.5	35.3		18.7852	4.25974	22.7333	675.881	0.103472
		LXG-14	74.72	0.154	13.63	1.48		0.102222	1.24	0.094	0.286	0.823	2.51	4.74	0.243	1.31		715	14.7	54.7	12.3	75.4	2.39	50.9		48.6395	4.44715	31.5481	744.325	0.0824373
	Porphyritic granite	LXG-15	73.69	0.141	14.7	1.55		0.127778	1.28	0.072	0.206	0.781	3.92	3.8	0.296	0.85		806	17.8	117	27.7	79.1	3.02	92.2		45.2809	4.22383	26.1921	743.353	0.0998264
		LXG-16	69.71	0.311	15.86	2.12		0.131111	1.79	0.039	0.427	1.16	2.95	6.4	0.23	0.78		511	102	38.6	3.8	141	3.65	7.06		5.0098	10.1579	38.6301	780.041	0.0732464
		LXG-17	73.46	0.065	15.05	0.895		0.0283333	0.78	0.086	0.115	0.531	3.34	5.38	0.387	0.6		1058	15.8	99	32.4	38.9	1.69	112		66.962	3.05556	23.0178	689.013	0.0363248
		LXG-18	73.68	0.096	14.87	0.979		0.0456667	0.84	0.086	0.183	0.812	3.49	4.69	0.252	0.85		898	41.5	43.4	13.2	46.8	1.64	31		21.6386	3.28788	28.5366	701.883	0.0543651
		LXG-19	74.73	0.203	13.44	1.71		0.0544444	1.49	0.078	0.3	0.963	2.76	4.58	0.227	1		585	35.4	53.7	10.1	107	2.81	43.8		16.5254	5.31683	38.0783	768.052	0.0365399
		LXG-20	74.71	0.152	13.93	1.39		0.112222	1.15	0.089	0.218	0.644	3	4.59	0.228	1.02		731	32.6	52.1	11.6	76.6	2.37	45.8		22.4233	4.49138	32.3207	744.502	0.0975845
		LXG-22	74.63	0.098	14.48	0.96		0.0266667	0.84	0.082	0.197	0.804	3.34	4.35	0.233	0.82		834	33	33.8	8.74	63.7	2	29.2		25.2727	3.86728	31.85	728.297	0.031746
		LXG-23	75.05	0.101	14.21	1.25		0.161111	0.98	0.092	0.14	0.54	3.23	4.46	0.308	0.63		815	12.7	65.7	18.6	55.8	2.01	56.8		64.1732	3.53226	27.7612	720.719	0.164399
		LXG-24	75.95	0.08	13.72	0.853		0.053	0.72	0.054	0.141	0.549	2.86	4.81	0.223	0.67		716	18.9	59.6	11.8	50	1.89	58.9		37.8836	5.05085	26.455	712.28	0.0736111
Dulong Sn-Pb-Zn deposit	fine-grained granite	11TJ-62	73.21	0.1	14.46	0.99				0.04	0.22	0.77	3.64	4.41	0.24	1.23	99.31	429	28.1	27.1	7.09	56	2	17	25	15.2669	3.82228	28	714.129		Xu et al., 2015
		11TJ-61	72.54	0.11	14.38	0.9				0.04	0.21	0.93	3.19	5.55	0.2	1.45	99.48	506	30.7	22.5	5.25	72	2.2	20	47	16.4821	4.28571	32.7273	727.155
		11TJ-58	71.81	0.17	14.97	1.35				0.04	0.27	0.94	3.39	5	0.24	1.6	99.77	443	46.5	28.9	7.62	98	3.1	14	30	9.52688	3.79265	31.6129	755.856
		11TJ-55	71.31	0.1	15.4	1.47				0.06	0.34	0.84	3.59	4.69	0.21	1.57	99.58	459	37.8	25.8	7.32	53	1.9	16	55	12.1429	3.52459	27.8947	710.564
		11LJS-96-2	72.05	0.13	14.6	1.39				0.05	0.3	0.82	3.06	5.14	0.26	1.12	98.93	435	34.2	19.9	4.95	81	2.6	12	47	12.7193	4.0202	31.1538	743.305
		11LJS-68	73.59	0.13	13.95	1.16				0.04	0.26	0.78	3.15	4.86	0.23	1.19	99.34	344	37	16.8	3.24	76	2.5	22	27	9.2973	5.18519	30.4	737.58
		DL-43	73.12	0.09	14.65	0.9				0.03	0.21	0.82	3.83	4.42	0.22	1.53	99.83	402	30.8	22.1	6.72	57	2	17	28	13.0519	3.28869	28.5	713.424
		DL-30	73.84	0.07	14.38	0.71				0.03	0.15	0.81	3.77	4.41	0.22	1.39	99.78	409	25.1	20.5	5.44	42	1.5	44	25	16.2948	3.76838	28	691.016
		DL-29	73.09	0.09	14.49	0.87				0.05	0.15	0.82	3.78	4.55	0.2	1.33	99.4	435	26.2	17.3	7.15	53	1.9	230	55	16.6031	2.41958	27.8947	706.907
		DL-28	73.53	0.08	14.59	0.76				0.03	0.18	0.88	3.77	4.42	0.23	1.19	99.66	403	28.7	22.3	7.24	56	2	32	30	14.0418	3.08011	28	712.048
		DL-27	73.91	0.08	14.45	0.9				0.03	0.18	0.7	3.42	4.72	0.21	1.22	99.82	433	20	19.7	5.62	50	1.7	82	68	21.65	3.50534	29.4118	706.978
		13MG-11	72.85	0.1	14.66	1.06				0.04	0.25	0.72	4.02	4.38	0.24	1	99.31	416	30.7	25.5	6.6	50	1.9	21	26	13.5505	3.86364	26.3158	702.73
	Coarse-grianed granite	13MG-12	72.67	0.1	14.71	1				0.04	0.23	0.72	3.91	4.42	0.26	1.2	99.27	417	33	26.1	7.06	52	2	13	30	12.6364	3.69688	26	706.826
		13MG-13	73.11	0.1	14.74	1.09				0.04	0.19	0.68	4.01	4.45	0.24	1.1	99.75	425	29.8	25.7	5.93	53	2	11	26	14.2617	4.3339	26.5	707.611
		13MG-14	73.14	0.1	14.48	0.94				0.04	0.29	0.69	3.89	4.59	0.24	1.1	99.51	447	35.7	23.9	6.33	48	1.9	15	37	12.521	3.77567	25.2632	699.308
		13HST-5	72.27	0.1	15.1	1.11				0.04	0.18	0.73	3.94	4.6	0.23	1.3	99.61	440	33.5	24.3	7.03	52	2	11	24	13.1343	3.45661	26	706.56
		13HST-6	72.97	0.11	14.79	1.03				0.04	0.26	0.68	3.66	4.38	0.25	1.5	99.64	437	34.1	26.1	7.6	52	2	11	26	12.8152	3.43421	26	710.928
		13HST-1	70.39	0.22	14.8	1.85				0.06	0.46	1.05	3.37	5.18	0.26	1.4	99.04	430	77	26.5	6.31	134	4.3	9	25	5.58442	4.19968	31.1628	777.136
	Porphyritic granite	13HST-2	71.68	0.24	14.68	1.97				0.06	0.49	1.04	3.4	4.68	0.28	1.4	99.91	357	79.3	28.8	5.69	149	4.7	9	24	4.50189	5.06151	31.7021	790.377
		13HST-3	70.73	0.25	14.92	1.74				0.06	0.49	1.11	3.65	5.29	0.24	1	99.48	395	84	31.3	6.43	144	4.5	7	21	4.70238	4.86781	32	778.422
		13HST-4	71.64	0.23	14.67	1.86				0.06	0.38	1.1	3.62	4.45	0.26	1.2	99.47	362	67.2	29.4	6.71	132	4.2	8	26	5.3869	4.38152	31.4286	778.24
		13HST-7	71.02	0.23	14.38	1.74				0.09	0.34	1.59	2.77	5.11	0.27	1.9	99.44	537	59.2	29.9	6.09	141	4.4	12	51	9.07095	4.90969	32.0455	780.925
		13HST-20	72.92	0.12	14.5	1.07				0.03	0.24	0.65	3.87	4.43	0.24	1.1	99.17	434	26.7	30.3	8.88	55	2.2	82	21	16.2547	3.41216	25	711.361
		13HST-23	72.3	0.15	15.37	1.21				0.07	0.36	0.67	2.22	6.77	0.28	0.4	99.81	697	35.2	24.7	5.13	90	3.2	7	32	19.8011	4.81481	28.125	754.468
		13HST-24	72.03	0.15	14.32	1.07				0.04	0.52	0.59	2.32	6.68	0.27	1.5	99.49	628	39.4	24.9	5.01	87	3.2	7	18	15.9391	4.97006	27.1875	747.19
Bainiuchang Sn-Pb-Zn-Ag deposit	bitite monzogranite	126-14-552	69.3	0.5	13.6			0.524	2.84	0.04	1.02	2.23	2.74	5.46	0.176		99.989	284	267	46	2.28	128		1.22	14.9	1.06367	20.1754		752.261	0.184507	Zhang, 2017
		126-14-559	69.62	0.46	13.24			0.557	3.04	0.047	0.894	2.12	2.78	5.43	0.163		100.373	294	294	48.4	2.89	131		3.16	14.5	1	16.7474		753.194	0.183224
		ZKD-1-503	65.65	0.73	14.35			0.186	4.98	0.049	1.21	2.53	2.69	5.46	0.216		99.492													0.0373494
		ZKD-1-509	65.67	0.69	14.31			0.066	5.25	0.05	1.21	2.08	2.69	5.46	0.2		99.106													0.0125714
		ZK130-11	67.23	0.49	15.16			0.62	3.06	0.08	1.46	2.28	3.33	4.85	0.16		99.49		247	22.28		54.9		4.2	12.1				691.53	0.202614
		ZK126-10	67.64	0.42	15.51			0.55	2.53	0.07	1.01	2.11	3.14	5.02	0.15		99.37		291	18.11		46.11		4.3	11.9				685.019	0.217391
		BZ-1	67.09	0.63	14.63			0.516	3.45	0.056	1.2	2.48	2.75	5.4	0.242		99.69	314	305	42.9	2.19	137		6.8	11.8	1.02951	19.589		759.129	0.149565
	granite porphyry	Ch-1	68.62	0.678	15.73			1.96	1.62	0.046	1.05	0.306	0.967	5.15	0.114			251	69.7	44.9	2.28	176				3.60115	19.693		847.849	1.20988
		D80-4-5	63.96	0.808	14.65			1.91	4.41	0.309	1.24	1.22	0.089	4.67	0.311			346	15.9	47	1.91	138				21.761	24.6073		821.309	0.433107
		D60-5	69.35	0.528	13.91			1.55	3.25	0.058	0.907	0.644	0.104	4.44	0.237			316	22.7	36	1.93	157				13.9207	18.6528		844.729	0.476923
		880-4	62.78	0.7	14.42			3.21	1.38	0.097	1.56	3.63	0.099	4.01	0.298			274	134	44.8	2.11	178				2.04478	21.2322		812.736	2.32609
		880-6	59.66	0.748	13.81			4.91	1.12	0.987	1.19	4.22	0.106	3.55	0.947			355	38.2	43.3	1.85	156				9.29319	23.4054		789.837
		880-14	64.48	0.656	14.32			2.54	1.21	0.048	1.32	3.13	0.11	5.32	0.28			29	137	41.8	1.91	160				0.211679	21.8848		799.057	2.09917
		1760-4	64.87	0.766	14.58			1.03	2.81	1.18	1.21	1.59	0.075	5.15	0.289			568	21.6	46.3	1.85	169				26.2963	25.027		831.57	0.366548
Fe2O3T and FeOT represents the total Fe content is expressed as Fe2O3 and FeO respectively.
Reference
Cheng, Y.B., and Mao, J.W., 2010, Age and geochemistry of granites in Gejiu area, Yunnan province, SW China: Constraints on their petrogenesis and tectonic setting: Lithos, v. 120, p. 258-276.
Cai, M.H., Liang, T., Wu, D.C., and Huang, H.M., 2004a, Geochemical characteristics of granites and its structural genetic environment in the Nandan-Hechi metallogenetic belt, northwest Guangxi: Geotectonic et Metallogenia, v. 28, p. 306-313 (in Chinese with English abstract).
Cai, M.H., Liang, T., WU, D.C., and Huang, H.M., 2004b, Geochemical characteristics of granties and their tectonic setting of Dachang ore field in Guangxi: Geological Science and Technology Information, v.23, p. 57-62 (in Chinese with English abstract)
Huang, W.T., Liang, H.Y., Zhang, J., Wu, J., Chen, X.L., and Re, L., 2019, Genesis of the Dachang Sn-polymetallic and Baoshan Cu ore deposits, and formation of a Cretaceous Sn-Cu ore belt from southwest China to western Myanmar: Ore Geology Reviews, v. 112, p. 103030
Liang, T., 2008. Ph.D. Thesis (in Chinese with English abstract) In: Metallogenic Mechanism of Changpo–Tongkeng Tin Polymetallic Deposit in Dachang area, Guangxi, pp. 1–248.
Wang, T.Y., Li, G.J., Wang, Q.F., Santosh, M., Zhang, Q.Z., and Deng J., 2019, Petrogenesis and metallogenic implications of Late Cretaceous I- and S-type granites in Dachang–Kunlunguan ore belt, southwestern South China Block: Ore Geology Revies, v. 113, p. 103079
Xu, B., Jiang, S.Y., Wang, R., Ma, L., Zhao, K.D., and Yang, X., 2015, Late Cretaceous granites from the giant Dulong Sn-polymetallic ore district in Yunnan Province, South China: Geochronology, geochemistry, mineral chemistry and Nd–Hf isotopic compositions: Lithos, v. 218-219, p. 54-72
Zhang, H.P., 2007, Bainiuchang super-large silver-polymetallic ore deposit related to granitic magmatism in Mengzi, Yunnan, China: Ph.D. Thsis.

## Sheet: 1E Qin-Qi-Kun W-Sn belt
Table S1E Geochemical data of the W(-Sn)-related granites in the Qin-Qi-Kun W-Sn belt.
Deposit	Rock type	Sample number	SiO2	TiO2	Al2O3	Fe2O3T	FeOT	Fe2O3	FeO	MnO	MgO	CaO	Na2O	K2O	P2O5	LOI	Total	Rb	Sr	Nb	Ta	Zr	Hf	W	Sn	Zr/Hf	Nb/Ta	Rb/Sr	Tzr(°C)	Fe2O3/FeO	Reference
Xiaoliugou W deposit	Granite	QB1	73.11	0.23	14.5	1.52				0.03	0.58	0.9	2.21	4.57	0.07	1.86	99.58	336	123	10.6	1.3	129	4	10	5	32.25	8.15385	2.73171	797.981		Wang et al., 2019
		QB2	76.4	0.14	11.96	1.24				0.02	0.23	0.67	2.45	4.71	0.04	1.07	98.93	263	70.6	24.7	3.1	92	3.5	4	4	26.2857	7.96774	3.72521	756.487
		QB4	74.66	0.16	13	1.38				0.02	0.28	1.1	3.17	4.51	0.05	0.96	99.29	278	101	27.2	3.8	105	4	1	5	26.25	7.15789	2.75248	758.163
		QB6	75.28	0.16	13.19	1.43				0.03	0.33	0.76	3.08	4.79	0.04	0.75	99.84	277	85.6	22.6	2.9	96	3.5	2	6	27.4286	7.7931	3.23598	755.61
		QB13	75.73	0.06	12.81	0.67				0.01	0.28	0.5	2.1	6.51	0.06	1.15	99.88	387	27.3	44.4	6.8	51	3.4	4	6	15	6.52941	14.1758	705.991
		QB15	73.94	0.16	12.46	1.36				0.03	0.25	1.4	2.79	4.63	0.04	1.95	99.01	287	67.8	23	2.7	97	3.7	4	5	26.2162	8.51852	4.23304	748.035
		QB16	74.3	0.09	11.84	1.09				0.02	1.84	3.58	0.09	4.44	0.02	3.29	100.6	277	34.3	30.2	5.4	75	3.8	5	6	19.7368	5.59259	8.0758	729.739
		QB17	76	0.13	12.85	0.8				0.01	0.14	0.83	2.72	5.46	0.03	1.14	100.11	311	46.1	28	3.2	85	3.7	3	3	22.973	8.75	6.7462	742.234
		QB18	74.62	0.18	13.32	1.14				0.02	0.2	0.96	2.91	4.91	0.05	1.11	99.42	283	102	23	2.4	108	3.8	3	4	28.4211	9.58333	2.77451	764.398
		QB19	77.13	0.14	11.82	1.21				0.02	0.24	0.87	2.82	4.28	0.04	0.84	99.41	260	83.7	26.1	4	95	3.6	1	5	26.3889	6.525	3.10633	754.166
		QB20	74.6	0.16	13.27	1.3				0.02	0.27	1.16	3.27	4.48	0.04	1.03	99.6	265	106	25.4	3.5	95	3.7	2	5	25.6757	7.25714	2.5	749.587
	Monazgranite	XLG-6	76.92	0.09	12.16			0.12	0.34	0.01	0.19	0.56	2.64	5.48	0.03			314	25.1	33.1	7.2	55.4	3.59			15.4318	4.59722	12.51	709.755	0.352941	Zhao et al., 2014
		XLG-7	76.97	0.1	12.41			0.17	0.34	0.01	0.21	0.6	2.61	5.54	0.03			313	26.5	35.1	8	56.8	3.69			15.393	4.3875	11.8113	712.322	0.5
		XLG-8	76.93	0.08	12.09			0.18	0.34	0.01	0.25	0.69	2.37	5.8	0.04			319	43	32.8	8.91	56.3	3.57			15.7703	3.68126	7.4186	709.445	0.529412
		XLG-48	76.05	0.13	13.48			0.11	0.7	0.03	0.23	0.92	3.91	4.13	0.03			259	58.5	22.4	3.3	59.5	3.07			19.3811	6.78788	4.42735	712.104	0.157143
		XLG-54	75.57	0.15	12.989			0.36	0.59	0.03	0.38	0.83	3.78	4.34	0.05			268	50.1	19.9	3.29	62.3	3.04			20.4934	6.04863	5.3493	713.527	0.610169
		XLG-132	76	0.12	12.37			0.09	0.63	0.02	0.2	0.75	2.61	5.67	0.04			303	34.6	25.8	6.35	62.1	3.73			16.6488	4.06299	8.75723	715.201	0.142857
		XLG-145	75.86	0.08	12.15			0.05	0.31	0.01	0.1	1.07	2.43	6.15	0.03			325	30.9	34.8	10.3	43.3	3.34			12.9641	3.37864	10.5178	681.736	0.16129
Baiganhu Sn-W deposit	Syenogranite	c1	72.27	0.25	14.35			0.46	1.42	0.07	0.63	1.87	3.29	4.03	0.1	1.65	100.39	257	173	14.2	4.32	100	3.61	113	23	27.7008	3.28704	1.48555	750.835	0.323944	Zhou et al., 2016
		c2	71.31	0.26	14.57			0.42	1.38	0.07	0.64	1.83	3.32	4.03	0.12	1.7	99.65	267	182	13.8	4.44	119	4.1	51.8	24.9	29.0244	3.10811	1.46703	766.155	0.304348
		c3	71.57	0.29	14.8			0.46	1.56	0.08	0.71	2.06	3.62	3.71	0.11	1.47	100.44	250	159	17.2	3.75	116	4.08	39.1	23.1	28.4314	4.58667	1.57233	760.718	0.294872
		c4	71.1	0.26	14.55			0.39	1.85	0.1	0.64	1.97	3.33	4.23	0.11	1.44	99.97	305	244	16.5	3.61	152	5.24	69.5	26	29.0076	4.57064	1.25	782.46	0.210811
		c5	71.88	0.3	13.84			0.87	1.7	0.12	0.71	1.79	3.32	3.54	0.13	1.77	99.97	257	208	17.5	2.72	168	5.59	55.6	34	30.0537	6.43382	1.23558	796.403	0.511765
	Monzogranite	BKN-03-01	71.92	0.33	13.21			1.02	1.8	0.06	0.31	1.69	3.05	5.25	0.07	1.16	99.86	112	86.4	18.2	1.26	416	9.65		4.14	43.1088	14.4444	1.2963	865.728	0.566667	Gao and Li, 2011
		BKN-03-02	71.6	0.33	13.4			1.08	1.74	0.05	0.29	1.64	3.08	5.56	0.06	1.02	99.86	115	84.6	18	1.01	430	9.7		3.95	44.3299	17.8218	1.35934	867.254	0.62069
		BKN-03-03	71.99	0.33	13.35			0.99	1.78	0.05	0.28	1.56	3.09	5.45	0.06	0.94	99.87	111	85.9	17.9	1.02	478	10.9		3.9	43.8532	17.549	1.2922	880.534	0.55618
		BGH2-06	70.99	0.25	13.29			0.24	1.52	0.08	0.75	2.03	3.24	4.01	0.1	1.78	98.28	231	230	0.48	0.93	112	4.13		20.2	27.1186	0.516129	1.00435	751.751	0.157895
	K-feldspar granite	BG11	70.95	0.32	13.79	3.27				0.07	0.24	1.37	3.33	5.46	0.06	0.82	99.68	99.5	92.7	22	1.13	448	10.8			41.4815	19.469	1.07335	878.803		Li et al., 2012
		BG12	73.82	0.19	13.05	2.49				0.06	0.21	0.93	3.15	5.44	0.05	0.93	100.32	108	81.1	16.2	0.88	445	10.8			41.2037	18.4091	1.33169	885.423
		BG13	71.85	0.28	13.34	2.98				0.08	0.28	1.04	3.09	5.83	0.06	0.7	99.53	118	86.9	26.2	1.25	423	10.4			40.6731	20.96	1.35788	875.762
		BG14	70.68	0.32	14.01	3.35				0.07	0.29	1.12	3.34	6.02	0.08	1	100.28	121	88	21.5	1.18	506	12.2			41.4754	18.2203	1.375	890.768
		BG19	71.87	0.25	13.75	2.73				0.07	0.22	0.86	3.14	6.24	0.05	0.94	100.12	110	85.8	18.7	0.94	359	8.83			40.6569	19.8936	1.28205	860.16
	Monzogranite	BG20	65.15	0.58	15.84	5.42				0.1	0.49	2.45	3.73	5.81	0.14	0.64	100.35	126	146	46.6	2.19	799	18.5			43.1892	21.2785	0.863014	920.82
		BG21	65.44	0.53	15.44	5.06				0.11	0.48	2.33	3.51	6.09	0.13	0.65	99.77	143	156	37.7	2.03	676	15.5			43.6129	18.5714	0.916667	902.586
		BG22	65.62	0.54	15.27	5.22				0.1	0.48	2.18	3.72	5.82	0.13	0.57	99.65	149	137	41.5	2.46	812	18.5			43.8919	16.8699	1.08759	923.519
		BG23	66.11	0.49	15.44	4.63				0.1	0.45	2.21	3.4	6.29	0.11	0.83	100.06	137	138	35.6	2.24	624	14.3			43.6364	15.8929	0.992754	896.527
		BG24	64.74	0.59	15.59	5.76				0.11	0.58	2.51	3.5	6.08	0.14	0.62	100.22	119	148	44.4	2.18	767	17.2			44.593	20.367	0.804054	913.539
	BGH-4.1	BGH-4.1	70.98	0.28	15.11			2.16			0.66	1.8	3.88	3.53	0.12	1.4	99.91	171.9	301.3	13.7	2.9	116.8	4			29.2	4.72414	0.570528	764.457		Wang et al., 2014
	BGH-4.2	BGH-4.2	70.57	0.3	14.81			2.36			-0.73	1.97	3.48	4.13	0.12	1.4	99.9	226.1	294.6	13.1	2.9	109.9	3.2			34.3438	4.51724	0.767481	757.141
	BGH-4.3	BGH-4.3	71.73	0.26	14.35			2.02			0.61	1.76	3.58	3.97	0.11	1.5	99.9	206	206	11.8	1.8	107.3	3			35.7667	6.55556	1	754.556
	BGH-4.4	BGH-4.4	70.62	0.29	14.86			2.33			0.69	2.08	3.76	3.49	0.11	1.6	99.88	186.7	186.7	14	2.2	126	3.6			35	6.36364	1	767.236
	BGH-4.5	BGH-4.5	70.69	0.31	15.18			2.4			0.73	2.2	3.91	2.88	0.11	1.4	99.89	179	179	15.7	3.2	118.1	3.4			34.7353	4.90625	1	765.145
Taergou W deposit	Fine-grained equigranular granite	YM-2	65.63	0.59	15.65			0.74	4.93	0.13	2.19	4.07	3.09	2.29	0.27			125	343.1			42.86						0.364325	674.092	0.150101	Mao et al., 2000
		YM-3	65.14	0.47	15.93			0.5	4.31	0.08	1.79	3.28	2.74	4.38	0.39			159	244.3			37.96						0.650839	665.41	0.116009
		YM-9	65.21	0.62	14.99			0.66	6.07	0.09	2.04	4.27	2.4	2.34	0.24			144	257.9			84.77						0.558356	725.513	0.108731
		YM-10	66.37	0.51	15.33			1.11	5.01	0.09	1.77	3.75	3.18	2.12	0.27			112	305.9			84.77						0.366133	727.634	0.221557
	Medium-grained equigranular granite	YM-5	71.18	0.23	15.02			0.68	2.42	0.06	0.57	2.14	3.15	4.11	0.07			98	73.26			38.46						1.3377	678.472	0.280992
		YM-6	71.48	0.25	14.98			0.42	2.56	0.06	0.61	2.29	3.68	3.48	0.06			90	167.5			96.32						0.537313	744.046	0.164062
		YM-7	67.35	0.47	14.86			0.87	4.16	0.11	1.69	3.14	2.61	3.64	0.2			159	318.4			69.11						0.499372	713.594	0.209135
		YM-8	70.33	0.38	14.76			0.67	3.83	0.09	1.6	2.56	2.61	2.68	0.18			138	240.6			49.53						0.573566	705.223	0.174935
	Porphyritic granodiorite	YM-13	63.66	0.63	15.22			0.87	4.35	0.13	2.38	4.42	2.53	4.6	0.28			168	294.5			48.14						0.570458	662.821	0.2
		YM-15	60.41	0.87	15.36			1.19	5.16	0.15	2.97	5.66	2.59	2.53	0.34			126	421.2			62.12						0.299145	677.257	0.23062
		YM-16	58.99	0.81	15.54			1.01	5.41	0.14	3.12	5.03	2.23	6.06	0.35			188	420			65.1						0.447619	662.634	0.186691
		YM-18	62.4	0.69	15.24			1.15	5.87	0.5	2.86	4.6	2.38	6.91	0.34			180	305.7			48.5						0.588813	640.592	0.195911
		YM-19	61.06	0.74	15.41			1.09	5.9	0.13	2.91	4.63	2.55	5.09	0.33			161	374.1			58.64						0.430366	665.9	0.184746
Fe2O3T and FeOT represents the total Fe content is expressed as Fe2O3 and FeO respectively.
References
Gao, Y.B., and Li, W.Y., 2011, Petrogenesis of granites containing tungsten and tin ores in the Baiganhu deposit, Qimantage, NW China: constraints from petrology, chronology and geochemistry: Geochimica, v. 40, p. 324-336 (in Chinese with English abstract).
Li, G.C., Feng, C.Y., Wang, R.J., Ma, S.C., Li, H.M., and Zhou, S.A., 2012, SIMS zircon U=Pb age, petrochemistry and tectonic implications of granitoids in northeastern Baiganhu W-Sn orefield, Xinjiang: Acta Geoscientica Sinica, v. 33, p. 215-226 (in Chinese with English abstract).
Mao, J.W., Yang, J.M., Zhang, Z.H., Zhang, Z.C., Wang, Z.L., and Tian, F., 2000, The study on petrology, mineralogy and geochemistry of tungsten-bearing granitic rocks in the Yeniutan, Subei County, Gansu Province: Acta Geologica Sinica, v. 74, p. 142-155 (in Chinese with English abstract).
Wang, T.G., Li, H., Liu, J.S., Evans, N.J., Wang, Y.C., and Zha, D.H., 2019, Whole-rock and zircon geochemistry of the Xiaoliugou granites, North Qilian Orogen (NW China): Implications for tectonic setting, magma evolution and W–Mo mineralization: Ore Geology Reviews, v. 115, p. 103166.
Wang, Z.Z., Han, B.F., Feng, C.Y., and Li, G.C., 2014, Geochronology, geochemistry and tectonic significance of granites in Baiganhu area, Xinjiang: Acta Petrologica et Mineralogica, v. 33, p. 597-616 (in Chinese with English abstract).
Zhao, X.M., Zhang, Z.H., Liu, M., Li, Y.S., and Guo, S.F., 2014, Zircon U-Pb geochronology, geochemistry and petrogenesis of the granites from the Xiaoliugou deposit in the western of the North Qilian: Acta Petrologica Sinica, v. 30, p. 16-34 (in Chinese with English abstract)
Zhou, J.H., Feng, C.Y., Li, D.X., and Li, G.C., 2016, Geological, geochemical, and geochronological characteristics of CaledonianW–Sn mineralization in the Baiganhu orefield, southeastern Xinjiang, China: Ore Geology Reviews, v. 75, p. 125-149.

## Sheet: 1F Cornwall Sn region
Table S1E Geochemical data of the Sn-related granites in theCornwall Sn region.
Pluton	Rock type	Sample number	SiO2	TiO2	Al2O3	Fe2O3T	FeOT	Fe2O3	FeO	MnO	MgO	CaO	Na2O	K2O	P2O5	LOI	Total	Rb	Sr	Nb	Ta	Zr	Hf	W	Sn	Rb/Sr	Nb/Ta	Zr/Hf	Tzr(°C)	Fe2O3/FeO	Reference
Isles of Scilly	Two-mica granite	SC01	71.85	0.2	14.85			1.42		0.017	0.35	0.53	2.76	5.57	0.2	1.38	99.127	430	114	9.3		115				3.77193			777.545		Simons et al., 2016
		SC02	72.3648	0.223015	14.9254			1.48062		0.0265618	0.376177	0.584279	2.65803	5.95984	0.225298	1.204	100.028	365.217	90.5463	8.2		88.2192				4.03349			753.088
		SC03	72.08	0.19	14.94			1.46		0.028	0.36	0.63	2.95	5.15	0.21	1.28	99.278	449	103	10.4		105				4.35922			770.037
		SC04	73.13	0.05	14.78			0.85		0.022	0.12	0.44	3.31	4.83	0.26	1	98.792	446	52	12.9		24				8.57692			659.554
		SC05	71.99	0.3	15.17			1.97		0.022	0.53	0.9	2.59	5.66	0.24	1.28	100.652	398	131	8.5		151				3.03817			798.549
		SC06	73.29	0.24	14.79			1.59		0.018	0.41	0.98	3.31	5.02	0.07	1.19	100.908	255	157	16.1		186				1.6242			811.126
		SC07	73.03	0.2	14.75			1.49		0.021	0.39	0.85	3.19	5.27	0.13	1.13	100.451	314	132	6.8		133				2.37879			782.387
Land's End	Biotite granite	LE01	70.4139	0.388173	15.0935			2.79056		0.0418859	0.643369	0.744209	2.73847	5.81982	0.295176	1.189	100.158	371.144	79.8131	19		138.112				4.65016			787.662		Simons et al., 2016
		LE02	69.77	0.39	14.78			2.85		0.046	0.69	0.8	2.68	5.43	0.28	1.5	99.216	418	85	19.4		174				4.91765			809.923
		LE03	70.86	0.35	14.57			2.6		0.042	0.62	0.75	2.76	5.19	0.27	1.3	99.312	418	88	18.7		159				4.75			803.313
	Tourmaline granite	LE04	73.5	0.11	14.57			1.51		0.027	0.11	0.37	3.31	4.47	0.35	1.22	99.547	952	16	33.6		47				59.5			709.62
		LE05	73.9083	0.104144	14.3534			1.5392		0.0357563	0.0703135	0.375303	3.42399	4.49504	0.350597	1.002	99.658	826.866	13.7167	33.2		41.4818				60.2819			698.099
	Biotite granite	LE06	70.92	0.27	14.49			1.98		0.026	0.36	0.63	2.74	5.56	0.25	1.29	98.516	414	81	20.2		139				5.11111			790.397
	Muscovite granite	LE07	71.57	0.16	14.48			1.6		0.024	0.34	0.39	2.14	6.35	0.26	1.61	98.924	547	41	19.1		71				13.3415			739.18
		LE08	71.9	0.15	14.65			1.5		0.019	0.31	0.54	2.69	5.73	0.27	1.39	99.149	532	47	18.9		69				11.3191			734.156
		LE09	71.87	0.16	14.62			1.48		0.026	0.3	0.6	3	5.27	0.27	1.45	99.046	521	54	18.9		71				9.64815			735.419
	Biotite granite	LE10	71.7275	0.355562	14.5616			2.34112		0.0255402	0.649228	0.519241	2.65923	5.63494	0.265056	1.473	100.212	364.14	77.7926	19.5		132.761				4.68092			788.44
		LE11	70.62	0.35	14.48			2.28		0.015	0.66	0.5	2.5	5.54	0.26	1.74	98.945	417	96	17.2		161				4.34375			808.228
		CW37*	73.71	0.29	13.94			1.90797		0.03	0.35	0.58	2.55	5.55	0.25		99.158	436	73	19.6		120				5.9726			779.375
	Tourmaline granite	CW01*	74.08	0.08	14.22			3.36459		0.03	0.08	0.49	0.56	5.89	0.38		99.1746	505	24			38				21.0417			711.041
		CW68*	73.88	0.1	14.07			0.760089		0.01	0.05	0.38	2.85	7.1	0.25		99.4501	434	51			51				8.5098			699.037
		LE1	70.46	0.38	14.81			0.32	2.19	0.07	0.65	0.85	2.52	5.57	0.29		100.15	415	97	19	3.8	169	4.6	6	9	4.27835	5	36.7391	808.065	0.146119	Chappell and Hine, 2006
		GPE19	70.24	0.38	14.92			0.16	2.35	0.05	0.71	0.88	2.67	5.43	0.29		99.83	411	86	18.5	5.2	163	4.4	9	9	4.77907	3.55769	37.0455	803.904	0.0680851
		LE4	70.31	0.35	14.72			0.31	2.07	0.05	0.61	0.85	2.65	5.4	0.28		99.8	425	86	19	4.7	152	4.2	10	16	4.94186	4.04255	36.1905	797.941	0.149758
		LE3	71.11	0.29	14.75			0.47	1.53	0.03	0.46	0.8	2.61	5.69	0.3		100.17	458	78	20.5	4.2	140	3.9	12	9	5.87179	4.88095	35.8974	790.267	0.30719
		GPE20	73.23	0.15	14.13			0.52	0.77	0.02	0.22	0.65	2.69	5.24	0.31		99.98	675	29	26	8.8	66	2.1	18	78	23.2759	2.95455	31.4286	731.499	0.675325
		LE2	72.21	0.16	14.67			0.32	1.15	0.07	0.32	0.64	3.05	4.99	0.27		99.84	484	53	20	5.3	68	2.1	15	28	9.13208	3.77358	32.381	733.407	0.278261
		GPE18	72.5	0.16	14.92			0.39	0.98	0.03	0.35	0.51	2.98	5.19	0.28		100.11	493	60	19.5	5.4	69	2.1	14	29	8.21667	3.61111	32.8571	736.639	0.397959
	Fine-grained porphyritic granite	CW12	65.79	0.97	15.5			1.6	3.84	0.08	1.32	1.89	3.45	3.46	0.39	1.18	99.9	547	73	26	1.94	378	9.14		5	7.49315	13.4021	41.3567	873.44	0.416667	Muller-2006(albite microgranite is not included, because of different source)
		CW25	72.67	0.34	14			0.56	1.59	0.03	0.48	0.81	2.8	5.24	0.24	0.98	99.9	412	90	21	2.75	138	3.97		15	4.57778	7.63636	34.7607	786.947	0.352201
	Medium- to coarse-grained porphyritic granite	CW20	71.24	0.35	14.77			0.57	1.66	0.04	0.44	0.76	2.77	6.03	0.28	0.86	99.9	460	85	23	2.94	180	4.87		12	5.41176	7.82313	36.961	807.817	0.343373
	Flow banded medium- to coarse-grained porphyritic granite	CW04	68.85	0.74	16.45			1.82	1.45	0.04	0.38	0.51	3.47	4.58	0.32	1.17	100	564	29	71	12.15	308	9.55		20	19.4483	5.84362	32.2513	873.446	1.25517
	Prphyritic pellitras granite	CW37	73.71	0.29	13.94			1.03	0.79	0.03	0.35	0.58	2.55	5.55	0.25	0.77	99.9	436	73	21	4.13	120	3.53		12	5.9726	5.08475	33.9943	779.375	1.3038
	Pellitras tourmaline granite	CW34	75.52	0.1	13.42			0.97	0.36	0.01	b0.05	0.29	2.5	5.84	0.16	0.8	100.1	520	15	21	4.33	36	1.51		100	34.6667	4.84988	23.8411	686.113	2.69444
	Porphyritic Lithian siderophyllite granite	CW44	73.74	0.24	13.94			0.84	1.3	0.03	0.3	0.68	2.44	4.69	0.26	1.28	100.1	731	18	31	6.5	101	3.18		30	40.6111	4.76923	31.761	772.329	0.646154
	Equigranular Li-siderophyllite Granite	CW32	75.46	0.15	13.45			0.94	0.65	0.02	0.18	0.42	2.62	4.96	0.23	0.81	100	592	18	23	5.97	66	2.27		15	32.8889	3.8526	29.0749	735.219	1.44615
	Tourmaline-rich Porthmeor granite	CW68	73.88	0.1	14.07			0.36	0.36	0.01	0.05	0.38	2.85	7.1	0.25	0.57	100	434	51	27	7.5	51	2.19		10	8.5098	3.6	23.2877	699.037	1
	Tourmaline micro-granite	CW71	75.91	0.16	13.98			1.49	0.36	0.02	0.26	0.64	5.75	0.4	0.35	0.55	100	13	52	11	3.41	38	1.54		25	0.25	3.22581	24.6753	691.415	4.13889
	Pink tourmaline granite	CW01	74.08	0.08	14.22			2.72	0.58	0.03	0.08	0.49	0.56	5.89	0.38	0.63	99.9	505	24	29	8.78	38	1.53		10	21.0417	3.30296	24.8366	711.041	4.68966
	Contact tourmaline granite	CW03	77.39	0.08	12.1			2.71	0.5	0.02	0.16	0.47	0.43	4.94	0.32	0.69	99.9	322	33	37	9.94	39	1.64		25	9.75758	3.72233	23.7805	715.927	5.42
Godolphin-Tregonning	Two-mica granite	GD01	70.59	0.31	14.73			2.31		0.012	0.47	0.37	1.8	6.03	0.24	2.12	98.982	435	92	12.1		177				4.72826			825.771		Simons et al., 2016
	Topaz granite	TR01	73.88	0.03	15.17			1.57		0.079	0.08	0.61	1.67	5.05	0.42	2.02	100.579	740	32	69.7		16				23.125			646.606
		TR02	70.22	0.07	17.15			1.34		0.063	0.11	0.44	4.17	4.27	0.49	1.41	99.733	1360	25	67.3		37				54.4			691.482
		TR03	71.09	0.05	16.55			0.97		0.076	0.03	0.3	4.02	4.24	0.47	1.32	99.116	1530	22	79.5		24				69.5455			662.97
		TR04	70	0.08	17.89			1.46		0.061	0.15	0.55	4.14	4.17	0.54	1.72	100.761	1320	68	64.1		39				19.4118			697.163
		OT06	72.87	0.04	15.87			0.63		0.081	0.02	0.21	4.71	3.44	0.43	0.89	99.191	1180	14	39.3		21				84.2857			651.896
Carnmenellis	Two-mica granite	CN01	72.04	0.18	14.98			1.49		0.027	0.32	0.69	3.06	4.99	0.21	1.07	99.057	427	95	11.1		78				4.49474			744.911		Simons et al., 2016
		CN02	71.39	0.27	14.57			1.94		0.031	0.5	0.92	2.84	4.81	0.23	1.19	98.691	436	98	13.8		120				4.44898			779.343
		CN03	72.5789	0.271405	14.6707			1.96642		0.0398427	0.480476	0.929728	3.0062	4.88887	0.237346	1.091	100.161	370.969	77.7099	13.3		96.0928				4.77377			758.531
		CN05	71.2127	0.24276	14.536			1.74953		0.0381223	0.401628	0.777929	3.09474	4.83954	0.233073	1.105	98.231	402.331	71.9483	12.5		83.581				5.59194			747.578
		CN08	71.62	0.23	14.92			1.68		0.033	0.43	0.87	3	5.03	0.24	1.22	99.273	469	90	12.9		103				5.21111			765.049
		CN09	72.439	0.229327	14.7962			1.74119		0.0408643	0.45235	0.814579	2.88254	5.44131	0.236141	1.191	100.264	356.804	67.6544	11.2		82.8761				5.27392			745.666
		CN10	72.05	0.21	14.79			1.63		0.054	0.43	0.67	2.74	5.57	0.22	1.29	99.654	485	91	11.2		92				5.32967			756.752
		CN11	71.17	0.18	15.02			1.37		0.027	0.31	0.61	2.89	5.5	0.23	1.27	98.577	434	107	10.9		80				4.05607			745.87
		CN12	71.68	0.22	14.63			1.66		0.08	0.39	0.75	2.8	5.19	0.22	1.38	99	438	88	10.1		101				4.97727			765.027
		CN13	71.58	0.25	14.85			1.85		0.038	0.47	0.72	2.85	5.21	0.24	1.31	99.368	515	94	16.9		109				5.47872			771.764
		CN14	71.69	0.23	14.53			1.75		0.019	0.43	0.66	2.6	5.42	0.23	1.45	99.009	434	107			106				4.05607			770.389
		CN15	71.29	0.25	14.77			1.77		0.036	0.43	0.7	2.63	5.57	0.24	1.43	99.116	410	119	11.2		115				3.44538			775.987
		CN16	71.9196	0.25247	14.4939			1.88663		0.0633397	0.401959	0.457401	1.19936	7.72439	0.233731	1.4	100.033	445.148	52.0966	12.4		90.6993				8.54467			758.486
		GPE11	71.23	0.25	15.18			0.3	1.32	0.04	0.49	0.99	3.01	5.03	0.24		100.13	431	95	10	2.5	110	3.2	20	12	4.53684	4	34.375	769.74	0.227273	Chappell and Hine, 2006
		GPE16	70.99	0.28	15.15			0.21	1.53	0.04	0.51	0.98	2.98	5.08	0.26		99.8	443	102	12	2.9	121	3.4	8	11	4.34314	4.13793	35.5882	777.557	0.137255
		GPE14	72.3	0.27	14.48			0.12	1.54	0.04	0.48	0.99	3.02	4.7	0.24		99.98	420	92	11.5	3.1	113	3.3	7	10	4.56522	3.70968	34.2424	771.764	0.0779221
		GPE12	70.86	0.25	15.44			0.19	1.44	0.04	0.47	0.96	3.13	5.1	0.25		100.19	462	96	13	3.4	113	3.3	10	13	4.8125	3.82353	34.2424	771.321	0.131944
		GPE15	72.31	0.24	14.82			0.14	1.38	0.04	0.44	0.88	3.05	4.85	0.23		100.21	475	90	12	3.6	104	2.9	10	15	5.27778	3.33333	35.8621	766.389	0.101449
		GPE17	70.84	0.25	15.44			0.25	1.42	0.04	0.52	0.91	3.16	5.11	0.25		99.97	466	95	12.5	2.9	110	3.1	10	16	4.90526	4.31034	35.4839	769.156	0.176056
		GPE13	71.74	0.21	14.99			0.21	1.25	0.04	0.4	0.83	3.11	5.05	0.23		100.01	475	88	13	3.3	99	2.9	11	16	5.39773	3.93939	34.1379	761.168	0.168
St. Austell	Biotite granite	AU01	72.1678	0.0873126	14.943			0.875647		0.0132809	0.271879	1.68567	2.65683	4.70071	0.397584	1.825	99.6246	175.078	26.8769	12.4		42.236				6.51405			693.167		Simons et al., 2016
		AU02	71.15	0.28	14.87			2.17		0.045	0.5	0.77	2.55	5.48	0.24	1.4	99.455	406	113	12.4		125				3.59292			784.12
	Tourmaline granite	AU03	72.08	0.16	14.56			1.72		0.033	0.24	0.23	2.33	5.19	0.27	1.78	98.593	775	48	23		78				16.1458			756.549
		AU04	72.81	0.13	14.45			1.38		0.028	0.17	0.51	3.4	4.99	0.31	1.12	99.298	749	33	29.2		63				22.697			724.336
		AU07	73.54	0.09	15.26			0.91		0.006	0.14	0.89	3.34	4.63	0.39	1.47	100.666	601	61	25		38				9.85246			689.422
		AU08	72.9	0.1	14.32			1.25		0.018	0.14	0.58	3.32	4.44	0.33	1.29	98.688	725	27	31		59				26.8519			723.327
		AU09	72.99	0.09	14.43			1.25		0.017	0.14	0.46	2.71	4.98	0.38	1.28	98.727	816	29	33.9		47				28.1379			710.992
		AU10	72.45	0.09	14.41			1.39		0.02	0.13	0.49	2.48	5.69	0.41	1.26	98.82	854	24	25		47				35.5833			707.563
		AU11	73.15	0.13	14.98			1.35		0.015	0.22	0.56	3.4	4.89	0.34	1.27	100.305	796	37	32.3		68				21.5135			732.827
		AU12	72.9	0.08	14.8			1.16		0.008	0.09	0.44	3.47	4.64	0.39	1.22	99.198	713	40	32.6		40				17.825			694.735
		AU13	72.17	0.21	14.61			1.62		0.016	0.28	0.45	2.9	5.32	0.27	1.21	99.056	538	53	16.6		93				10.1509			760.017
		AU14	72.87	0.17	14.18			1.87		0.02	0.2	0.57	3.08	4.64	0.29	1.19	99.08	612	33	27		78				18.5455			745.732
	Topaz	AU06	72.57	0.06	15.66			0.87		0.022	0.12	0.4	3.62	4.8	0.46	1.43	100.012	1260	34	27		21				37.0588			650.896
		AU15	72.33	0.05	15.28			0.9		0.016	0.06	0.47	4.01	4.47	0.44	1.13	99.156	1070	19	35.2		23				56.3158			653.175
		AU16	72.51	0.05	15.27			1.05		0.012	0.14	0.54	4.06	4.18	0.44	1.18	99.432	888	46	37.5		21				19.3043			647.714
		AU17	71.88	0.05	15.65			1.05		0.016	0.13	0.45	3.72	4.56	0.45	1.29	99.246	935	60	37.8		21				15.5833			650.653
		GPE9	72.04	0.32	14.08			0.12	1.92	0.06	0.49	0.99	2.88	4.9	0.25		99.82	408	75	19	3.8	145	4	9	8	5.44	5	36.25	790.882	0.0625	Chappell and Hine, 2006
		GPE10	72.32	0.22	14.43			0.28	1.33	0.04	0.36	0.68	2.95	5.21	0.28		99.95	498	57	19	5.1	98	3	16	17	8.73684	3.72549	32.6667	760.55	0.210526
Bodmin	Two-mica granite	BD01	70.94	0.24	14.63			1.75		0.034	0.41	0.78	2.67	5.45	0.25	1.59	98.744	444	101	10.4		110				4.39604	#DIV/0!	#DIV/0!	770.864		Simons et al., 2016
		BD03	71.67	0.22	14.69			1.7		0.041	0.36	0.75	2.77	5.45	0.25	1.25	99.151	449	91	10.3		92				4.93407	#DIV/0!	#DIV/0!	755.732
		BD05	71.94	0.21	14.86			1.51		0.041	0.35	0.85	3.27	4.97	0.24	1.22	99.461	418	97	8		95				4.30928	#DIV/0!	#DIV/0!	755.693
		BD07	71.72	0.24	15.01			1.69		0.039	0.38	0.82	3.05	5.07	0.26	1.33	99.609	436	92	8		110				4.73913	#DIV/0!	#DIV/0!	770.744
		GPE7	71.79	0.23	14.88			0.16	1.37	0.04	0.42	0.88	2.73	5.34	0.27		100.25	449	93	11	3.1	105	3	10	13	4.82796	3.54839	35	767.249	0.116788	Chappell and Hine, 2006
		GPE6	71.41	0.22	15.22			0.21	1.22	0.05	0.41	0.89	3.1	4.96	0.29		99.97	433	84	12.5	3.5	113	3.2	7	23	5.15476	3.57143	35.3125	773.25	0.172131
		GPE5	72.28	0.19	14.54			0.31	0.97	0.05	0.27	0.74	2.84	5.19	0.29		99.87	510	64	14.5	4.5	92	2.8	18	29	7.96875	3.22222	32.8571	756.966	0.319588
Dartmoor	Tourmaline granite	DT03	73.8	0.17	13.53			1.01		0.003	0.2	0.61	3.59	4.49	0.23	1.03	98.663	447	55	25.9		40				8.12727			687.277		Simons et al., 2016
		DT04	74.3	0.16	13.29			1.05		0.001	0.21	0.76	3.43	4.52	0.21	0.99	98.921	436	54	26		63				8.07407			719.603
	Biotite granite	DT07	73.02	0.28	13.12			2.49		0.059	0.38	0.73	3	4.84	0.18	0.86	98.959	449	54	14.5		166				8.31481			800.576
		DT08	74.57	0.17	13.07			1.85		0.059	0.23	0.34	2.86	5.06	0.2	0.84	99.249	602	19	14.2		101				31.6842			764.469
		DT11	72.35	0.27	13.79			2.25		0.058	0.38	0.67	3.05	4.96	0.2	0.93	98.908	462	60	15.7		149				7.7			793.803
		DT16	73.59	0.23	13.4			1.82		0.043	0.35	0.47	3.11	5.05	0.19	0.9	99.153	362	52	11.6		103				6.96154			762.109
		DT17	71.27	0.32	14.19			2.32		0.029	0.54	0.97	3.09	5.21	0.15	0.97	99.059	358	126	16		153				2.84127			790.195
		DT19	71.43	0.32	13.94			2.23		0.04	0.57	1.16	3.06	4.64	0.16	1.21	98.76	321	110	16.3		154				2.91818			792.441
		DT20	71.41	0.32	14.37			2.37		0.044	0.6	1.24	3.12	4.93	0.17	0.77	99.344	351	112	16.1		156				3.13393			791.038
	Muscovite granite	DT21	72.89	0.2	14.56			0.65		< 0.001	0.34	0.03	0.36	9.65	0.04	1.21	99.93	898	98	11.4		78				9.16327			747.906
		DT25	70.42	0.45	14.35			3.3		0.053	0.58	0.81	2.87	4.8	0.24	1.48	99.353	532	80	21.4		233				6.65			838.196
		DG1	71.14	0.42	13.85			0.23	2.48	0.08	0.64	1.48	3	4.78	0.23		99.81	370	91	17	4.2	148	4.4	12	20	4.06593	4.04762	33.6364	782.236	0.0927419	Chappell and Hine, 2006
		GPE4	72.4	0.3	13.83			0.23	1.79	0.06	0.57	1.17	3.13	4.57	0.18		99.89	346	95	16	4.7	139	4	6	12	3.64211	3.40426	34.75	782.775	0.128492
		GPE3	73.01	0.26	13.7			0.17	1.69	0.07	0.44	0.75	2.99	5.03	0.19		99.8	382	56	17.5	4.3	110	3.2	7	11	6.82143	4.06977	34.375	766.54	0.100592
		DG2	73.69	0.22	13.63			0.16	1.62	0.08	0.4	0.54	2.98	5.01	0.18		100.14	381	45	17	4.5	96	2.8	9	13	8.46667	3.77778	34.2857	758.545	0.0987654
		GPE1	74.08	0.18	13.35			0.33	1.41	0.08	0.25	0.51	3.01	4.94	0.21		100.16	610	23.5	17	5.8	95	3.1	26	22	25.9574	2.93103	30.6452	757.215	0.234043
		GPE2	74.02	0.21	13.35			0.48	1.41	0.07	0.3	0.6	2.96	4.89	0.21		100.37	575	31.5	18	7.1	112	3.3	23	27	18.254	2.53521	33.9394	770.598	0.340426
		DG3	73.84	0.17	13.23			0.31	1.41	0.07	0.27	0.44	2.74	5.22	0.21		99.95	650	20.5	17.5	7	92	3	26	26	31.7073	2.5	30.6667	756.043	0.219858
Fe2O3T and FeOT represents the total Fe content is expressed as Fe2O3 and FeO respectively.
References
Chappell, B.W., Hine, R., 2006. The Cornubian Batholith: an example of magmatic fractionation on a crustal scale. Resource Geology 56, 203–244.
Müller, A., Seltmann, R., Halls, C., Siebel, W., Dulski, P., Jeffries, T., Spratt, J., Kronz, A., 2006. The magmatic evolution of the Land's End pluton, Cornwall, and associated preenrichment of metals. Ore Geology Reviews 28, 329–367
Simons, B., Shail, R.K., Andersen, J.C.Ø., 2016. The petrogenesis of the Early Permian Variscan granites of the Cornubian Batholith-lower plate post-collisional peraluminous magmatism in the Rhenohercynian Zone of SW England. Lithos 260, 76–94.

## Sheet: 1G Bolivian Sn belt
Table S1G Geochemical data of the Sn-related granites in the Bolivian Sn belt.
deposit	Rock type	Sample number**	SiO2	TiO2	Al2O3	Fe2O3T	FeOT	Fe2O3	FeO	MnO	MgO	CaO	Na2O	K2O	P2O5	LOI	Total	Rb	Sr	Nb	Ta	Zr	Hf	W	Sn	Rb/Sr	Nb/Ta	Zr/Hf	Tzr(°C)	Fe2O3/FeO	Reference
Llallagua		n=21	71.8	0.58	15.3		2.46			0.02	1.01	0.1	0.3	3.5	0.14	2.89	98.3	255	48					1.6	570	206	46	20	5.4		Dietrich et al., 2000
Chorolque		n=18	68.7	0.57	14.8		4.69			0.02	1.39	0.14	0.46	2.65	0.11	3.47	97.5	161	72					1.5	170	135	62	24	3.9
Cerro Rico		n=11	72.5	0.64	12.2		3.62			0.02	0.28	0.11	0.58	2.46	0.35	4.87	97.8	235	985					3.4	566	294	26	9	6.8
Oruro		n=8	69	0.67	14.1		3.25			0.15	0.87	0.87	1.25	4.02	0.14	4.11	98.8	206	130					1.5	58	209	41	5	5.7
San Rafael Tin deposit	tourmaline leucogranite/monzogranite-granodiorite	COCA154	70.7	0.35	14.67			2.06	NA	0.07	0.91	0.89	2.86	4.66	0.16		97.33	317	174	7		135			7	1.82184			790.725		Kontak and Clark, 2002, EG
		COCA165	69.5	0.34	15.5			2.74	NA	0.03	1.12	1.04	2.79	4.96	0.21		98.23	377	142	10		135			23	2.65493			789.56
		COCA248	70	0.4	15.22			2.31	NA	0.05	1.02	1.07	3	4.82	0.18		98.07	351	165	6		127			12	2.12727			781.519
		COCA406	66.4	0.48	16.1			2.62	NA	0.07	1.55	1.34	3.41	4.59	0.21		96.77	310	294	7		186			20	1.05442			809.446
		COCA408	66.5	0.49	15.91			3.27	NA	0.1	1.44	0.78	2.71	5.64	0.21		97.05	358	209	8		187			4	1.71292			817.177
		COCA194	69.11	0.4	16.29			0.34	2.17	0.05	1.63	1.54	2.91	4.83	0.21		99.48	329	227	17		122			9	1.44934			777.717	0.156682
		COCA202	68.4	0.43	15.32			2.74	NA	0.1	1.1	1.1	2.81	4.79	0.16		96.95	308	256	9		156			13	1.20312			801.458
		COCA197	68.34	0.45	16.65			0.3	2.38	0.07	1.57	1.45	3.47	4.7	0.25		99.63	306	298	13		158			8	1.02685			796.599	0.12605
		COCA166A	68.1	0.4	15.31			3.07	NA	0.07	1.17	1.14	3.24	4.78	0.18		97.46	322	168	9		147			23	1.91667			789.203
		COCA403	64.4	0.38	15.61			2.27	NA	0.05	1.3	0.95	4.08	3.23	0.18		92.45	230	256	9		143			7	0.898438			792.087
		COCA203	68.5	0.37	15.8			2.57	NA	0.05	1.23	1.02	2.46	4.96	0.19		97.15	308	168	7		134			17	1.83333			794.486
**In this column, n=XX refers to the whole-rock geochemical composition is the average of XX measurements
Fe2O3T and FeOT represents the total Fe content is expressed as Fe2O3 and FeO respectively.
References
Dietrich, A., Lehmann, B., and Wallianos, A., 2000, Bulk rock and melt inclusion geochemistry of Bolivian tin porphyry systems: Economic Geology, v. 95, p. 313-326.
Kontak, D.J., and Clark, A.H., 2002, Genesis of the giant, Bonanza San Rafael lode tin deposit, Peru: origin and significance of pervasive alteration: Economic Geology, v. 97, p. 1741-1777.

## Sheet: G49248
Zhao, P., et al., 2021, The role of phyllosilicate partial melting in segregating tungsten and tin deposits in W-Sn metallogenic provinces: Geology, https://doi.org/10.1130/G49248.1
